# Supplementary material
Source: Research Square preprint supplement (doi:10.21203/rs.3.rs-8921356/v1)
Supplement: Supplementary file 1 [file 44b4562b72460bc23d6efdd3.xlsx]

## Sheet: ALL-INSOLUBLE
CPFP Simple Protein Overview
Results										SPECTRAL COUNTS			SPECTRAL INDEX (MIC SIn)
Protein	Gene	Description	Length (AA)	mw (Da)	Indistinguishable Proteins	PSMs	Peptide Seqs	% Coverage	Modifications Observed	DHFR-Ub	219	247	DHFR-Ub	219	247
P06576	ATPB	ATP synthase subunit beta, mitochondrial OS=Homo sapiens GN=ATP5B PE=1 SV=3	529	56668.7		477	29	79	Gln->pyro-Glu (N-term Q),Oxidation (M)	151.76	177.57	141.82	6.707e-05	0.0001116	8.16e-05
P0CG47	UBB	Polyubiquitin-B OS=Homo sapiens GN=UBB PE=1 SV=1	229	34373.6	sp|P0CG48|UBC_HUMAN;sp|P62979|RS27A_HUMAN;sp|P62987|RL40_HUMAN;tr|B4DV12|B4DV12_HUMAN;tr|F5GXK7|F5GXK7_HUMAN;tr|F5GYU3|F5GYU3_HUMAN;tr|F5H265|F5H265_HUMAN;tr|F5H2Z3|F5H2Z3_HUMAN;tr|F5H388|F5H388_HUMAN;tr|F5H6Q2|F5H6Q2_HUMAN;tr|F5H747|F5H747_HUMAN;tr|J3QKN0|J3QKN0_HUMAN;tr|J3QS39|J3QS39_HUMAN;tr|J3QTR3|J3QTR3_HUMAN;tr|Q5PY61|Q5PY61_HUMAN;tr|Q96C32|Q96C32_HUMAN;	315	7	64.4	Glu->pyro-Glu (N-term E)	144.09	74.92	70.94	0.001274	0.000418	0.0005486
P25705	ATPA	ATP synthase subunit alpha, mitochondrial OS=Homo sapiens GN=ATP5A1 PE=1 SV=1	553	59875.7		307	27	60.4	Oxidation (M)	106.23	105.09	90.33	5.428e-05	6.03e-05	5.839e-05
P0DMV8	HS71A	Heat shock 70 kDa protein 1A OS=Homo sapiens GN=HSPA1A PE=1 SV=1	641	70246.2	sp|P0DMV9|HS71B_HUMAN;tr|A0A0G2JIW1|A0A0G2JIW1_HUMAN;	279	37	64.6	Ammonia-loss (N-term C) + Carbamidomethyl (C),Carbamidomethyl (C),Gln->pyro-Glu (N-term Q),Oxidation (M)	107.36	85.54	75.56	4.029e-05	3.494e-05	3.656e-05
P68363	TBA1B	Tubulin alpha-1B chain OS=Homo sapiens GN=TUBA1B PE=1 SV=1	451	50245.7		195	15	42.1	Carbamidomethyl (C),Gln->pyro-Glu (N-term Q)	59.3	71.92	55.58	2.633e-05	5.136e-05	4.742e-05
O60814	H2B1K	Histone H2B type 1-K OS=Homo sapiens GN=HIST1H2BK PE=1 SV=3	126	18828.4	sp|P57053|H2BFS_HUMAN;sp|P58876|H2B1D_HUMAN;sp|P62807|H2B1C_HUMAN;sp|Q5QNW6|H2B2F_HUMAN;sp|Q93079|H2B1H_HUMAN;sp|Q99877|H2B1N_HUMAN;sp|Q99879|H2B1M_HUMAN;sp|Q99880|H2B1L_HUMAN;tr|U3KQK0|U3KQK0_HUMAN;	186	6	45.2	Gln->pyro-Glu (N-term Q),Oxidation (M)	25	37	35.5	0.0001713	0.0002768	0.0002867
P13639	EF2	Elongation factor 2 OS=Homo sapiens GN=EEF2 PE=1 SV=4	858	95529.1		159	24	38.7	Carbamidomethyl (C),Oxidation (M)	52	58	47	6.747e-06	9.106e-06	8.315e-06
Q00839	HNRPU	Heterogeneous nuclear ribonucleoprotein U OS=Homo sapiens GN=HNRNPU PE=1 SV=6	825	90762.1		159	25	28.2	Acetyl (Protein N-term),Carbamidomethyl (C),Oxidation (M)	45.12	54.92	52.02	9.374e-06	1.624e-05	1.785e-05
P52272	HNRPM	Heterogeneous nuclear ribonucleoprotein M OS=Homo sapiens GN=HNRNPM PE=1 SV=3	730	77734.5	tr|A0A087X0X3|A0A087X0X3_HUMAN;	156	30	54.8	Acetyl (Protein N-term),Carbamidomethyl (C),Oxidation (M)	46.49	51.39	52.37	1.084e-05	1.096e-05	1.51e-05
Q08211	DHX9	ATP-dependent RNA helicase A OS=Homo sapiens GN=DHX9 PE=1 SV=4	1270	141247		146	37	36.4	Carbamidomethyl (C),Gln->pyro-Glu (N-term Q),Oxidation (M)	42	52	47	3.063e-06	4.759e-06	5.65e-06
P35232	PHB	Prohibitin OS=Homo sapiens GN=PHB PE=1 SV=1	272	29857.9		143	15	69.5		46.68	49.66	43.72	3.39e-05	6.035e-05	5.047e-05
P11142	HSP7C	Heat shock cognate 71 kDa protein OS=Homo sapiens GN=HSPA8 PE=1 SV=1	646	71034.3		132	26	49.7	Carbamidomethyl (C),Gln->pyro-Glu (N-term Q),Oxidation (M)	57.72	36.21	31.34	1.544e-05	1.232e-05	1.021e-05
Q12905	ILF2	Interleukin enhancer-binding factor 2 OS=Homo sapiens GN=ILF2 PE=1 SV=2	390	38976.2	tr|B4DY09|B4DY09_HUMAN;	129	15	59.1	Gln->pyro-Glu (N-term Q),Oxidation (M)	47.85	41.86	36.91	1.46e-05	1.613e-05	1.716e-05
P26599	PTBP1	Polypyrimidine tract-binding protein 1 OS=Homo sapiens GN=PTBP1 PE=1 SV=1	531	57329.7		126	14	56.1	Oxidation (M)	37.58	41.49	41.56	7.559e-06	1.318e-05	1.559e-05
P08670	VIME	Vimentin OS=Homo sapiens GN=VIM PE=1 SV=4	466	53745.2		125	27	59.4	Carbamidomethyl (C),Oxidation (M)	42.69	37.67	37.68	1.322e-05	1.723e-05	1.595e-05
Q9NYF8	BCLF1	Bcl-2-associated transcription factor 1 OS=Homo sapiens GN=BCLAF1 PE=1 SV=2	920	106329		117	25	28.5	Oxidation (M)	28.57	41.38	39.39	5.34e-06	9.423e-06	1.176e-05
P04406	G3P	Glyceraldehyde-3-phosphate dehydrogenase OS=Homo sapiens GN=GAPDH PE=1 SV=3	335	36120.4		113	11	54.3	Carbamidomethyl (C),Oxidation (M)	29	41.98	36.98	1.584e-05	3.173e-05	2.793e-05
Q13148	TADBP	TAR DNA-binding protein 43 OS=Homo sapiens GN=TARDBP PE=1 SV=1	414	44819.4		113	9	61.1	Carbamidomethyl (C),Oxidation (M)	3.91	61.2	43.61	4.326e-07	0.0001645	0.0002993
P40926	MDHM	Malate dehydrogenase, mitochondrial OS=Homo sapiens GN=MDH2 PE=1 SV=3	338	35570.8		111	13	51.5	Carbamidomethyl (C),Oxidation (M)	30	45	34	1.191e-05	4.534e-05	2.495e-05
P08238	HS90B	Heat shock protein HSP 90-beta OS=Homo sapiens GN=HSP90AB1 PE=1 SV=4	724	83428.2		106	34	52.2	Ammonia-loss (N-term C) + Carbamidomethyl (C),Carbamidomethyl (C),Oxidation (M)	31.24	32.24	33.95	9.888e-06	8.302e-06	1.139e-05
P27824	CALX	Calnexin OS=Homo sapiens GN=CANX PE=1 SV=2	592	67687.9		99	16	28.5	Gln->pyro-Glu (N-term Q),Oxidation (M)	33.79	33.77	28.85	8.811e-06	1.407e-05	1.304e-05
Q9Y2W1	TR150	Thyroid hormone receptor-associated protein 3 OS=Homo sapiens GN=THRAP3 PE=1 SV=2	955	108871		93	25	31.2	Oxidation (M)	27	31	31	6.152e-06	5.885e-06	6.585e-06
P61978	HNRPK	Heterogeneous nuclear ribonucleoprotein K OS=Homo sapiens GN=HNRNPK PE=1 SV=1	463	51070.5		92	12	36.1	Oxidation (M)	33.95	28.96	28.94	8.699e-06	1.324e-05	1.436e-05
P20700	LMNB1	Lamin-B1 OS=Homo sapiens GN=LMNB1 PE=1 SV=2	586	66529.7		92	24	46.4	Oxidation (M)	28.82	30.8	26.84	5.159e-06	9.308e-06	8.161e-06
P09874	PARP1	Poly [ADP-ribose] polymerase 1 OS=Homo sapiens GN=PARP1 PE=1 SV=4	1014	113301		90	26	39	Carbamidomethyl (C),Gln->pyro-Glu (N-term Q),Oxidation (M)	30	31	25	4.091e-06	4.068e-06	3.481e-06
Q99623	PHB2	Prohibitin-2 OS=Homo sapiens GN=PHB2 PE=1 SV=2	299	33290.9	tr|J3KPX7|J3KPX7_HUMAN;	88	12	49.7	Oxidation (M)	33.66	27.7	24.75	1.73e-05	2.42e-05	2.427e-05
P60842	IF4A1	Eukaryotic initiation factor 4A-I OS=Homo sapiens GN=EIF4A1 PE=1 SV=1	406	46232.6		87	22	67.7	Oxidation (M)	31.31	27.39	25.36	1.2e-05	2.291e-05	1.21e-05
P63244	RACK1	Receptor of activated protein C kinase 1 OS=Homo sapiens GN=RACK1 PE=1 SV=3	317	35144.6		84	13	52.4	Carbamidomethyl (C)	29.92	25.07	23.14	1.796e-05	2.044e-05	1.676e-05
O00571	DDX3X	ATP-dependent RNA helicase DDX3X OS=Homo sapiens GN=DDX3X PE=1 SV=3	662	71676.5	tr|A0A0D9SF53|A0A0D9SF53_HUMAN;tr|A0A0D9SFB3|A0A0D9SFB3_HUMAN;tr|A0A0D9SG12|A0A0D9SG12_HUMAN;	83	20	40.2	Acetyl (Protein N-term),Carbamidomethyl (C),Oxidation (M)	23.88	26.86	26.86	3.815e-06	5.411e-06	5.414e-06
P13010	XRCC5	X-ray repair cross-complementing protein 5 OS=Homo sapiens GN=XRCC5 PE=1 SV=3	732	82868.4		81	20	38.5	Oxidation (M)	21	32	26	3.839e-06	3.76e-06	4.229e-06
P49411	EFTU	Elongation factor Tu, mitochondrial OS=Homo sapiens GN=TUFM PE=1 SV=2	452	49636.3		80	15	43.8	Carbamidomethyl (C),Gln->pyro-Glu (N-term Q),Oxidation (M)	28	27	21	6.323e-06	1.026e-05	1.039e-05
O95831	AIFM1	Apoptosis-inducing factor 1, mitochondrial OS=Homo sapiens GN=AIFM1 PE=1 SV=1	613	67039		79	19	33.6	Oxidation (M)	29	24	20	3.102e-06	4.844e-06	3.571e-06
P06748	NPM	Nucleophosmin OS=Homo sapiens GN=NPM1 PE=1 SV=2	294	32626.9		77	8	46.6	Oxidation (M)	22	29	24	6.943e-06	1.351e-05	1.604e-05
P07437	TBB5	Tubulin beta chain OS=Homo sapiens GN=TUBB PE=1 SV=2	444	49765		77	26	74.3	Carbamidomethyl (C),Oxidation (M)	30.79	21.85	20.88	8.456e-06	9.785e-06	1.174e-05
P07900	HS90A	Heat shock protein HSP 90-alpha OS=Homo sapiens GN=HSP90AA1 PE=1 SV=5	732	84822.8		76	27	38	Ammonia-loss (N-term C) + Carbamidomethyl (C),Oxidation (M)	17.5	24.5	22	5.144e-06	7.984e-06	6.9e-06
P00374	DYR	Dihydrofolate reductase OS=Homo sapiens GN=DHFR PE=1 SV=2	187	21493.1		74	9	42.8	Oxidation (M)	40	11	13	0.0002885	7.337e-05	7.198e-05
P22314	UBA1	Ubiquitin-like modifier-activating enzyme 1 OS=Homo sapiens GN=UBA1 PE=1 SV=3	1058	118081		74	14	22		30	22	18	1.895e-06	1.611e-06	1.566e-06
P42704	LPPRC	Leucine-rich PPR motif-containing protein, mitochondrial OS=Homo sapiens GN=LRPPRC PE=1 SV=3	1394	158219		73	25	24.5	Carbamidomethyl (C),Oxidation (M)	25	22	18	9.683e-07	1.292e-06	1.094e-06
P14866	HNRPL	Heterogeneous nuclear ribonucleoprotein L OS=Homo sapiens GN=HNRNPL PE=1 SV=2	589	64254.5		68	13	38.4	Carbamidomethyl (C),Oxidation (M)	19.88	22.83	24.83	3.39e-06	5.764e-06	7.068e-06
P21796	VDAC1	Voltage-dependent anion-selective channel protein 1 OS=Homo sapiens GN=VDAC1 PE=1 SV=2	283	30825.6		68	10	46.3	Carbamidomethyl (C),Oxidation (M)	18	20.5	16	1.27e-05	1.525e-05	1.393e-05
Q14974	IMB1	Importin subunit beta-1 OS=Homo sapiens GN=KPNB1 PE=1 SV=2	876	97360.2		67	15	27.7	Acetyl (Protein N-term),Carbamidomethyl (C),Oxidation (M)	23.99	19.98	20.98	2.408e-06	2.893e-06	4.016e-06
P68104	EF1A1	Elongation factor 1-alpha 1 OS=Homo sapiens GN=EEF1A1 PE=1 SV=1	462	50279.2	sp|Q5VTE0|EF1A3_HUMAN;	65	11	27.9	Carbamidomethyl (C),Oxidation (M)	21.77	21.77	18.8	1.262e-05	1.268e-05	1.359e-05
P17844	DDX5	Probable ATP-dependent RNA helicase DDX5 OS=Homo sapiens GN=DDX5 PE=1 SV=1	614	69223.9	tr|J3KTA4|J3KTA4_HUMAN;	64	25	41.9	Carbamidomethyl (C),Gln->pyro-Glu (N-term Q),Oxidation (M)	15.94	23.38	21.42	4.652e-06	5.411e-06	6.105e-06
P11177	ODPB	Pyruvate dehydrogenase E1 component subunit beta, mitochondrial OS=Homo sapiens GN=PDHB PE=1 SV=3	359	39298.1		64	10	37	Carbamidomethyl (C),Oxidation (M)	13.96	21.88	20.9	2.972e-06	6.916e-06	7.205e-06
P05023	AT1A1	Sodium/potassium-transporting ATPase subunit alpha-1 OS=Homo sapiens GN=ATP1A1 PE=1 SV=1	1023	113130		64	14	18.4	Oxidation (M)	16.97	22.88	20.87	1.624e-06	2.816e-06	2.662e-06
P08865	RSSA	40S ribosomal protein SA OS=Homo sapiens GN=RPSA PE=1 SV=4	295	29458	tr|A0A0C4DG17|A0A0C4DG17_HUMAN;tr|C9J9K3|C9J9K3_HUMAN;	62	8	49.4	Acetyl (Protein N-term),Carbamidomethyl (C),Oxidation (M)	18	24	20	7.112e-06	1.293e-05	1.513e-05
P52292	IMA1	Importin subunit alpha-1 OS=Homo sapiens GN=KPNA2 PE=1 SV=1	529	57970		61	10	35.5	Gln->pyro-Glu (N-term Q)	19	19	18	4.01e-06	5.143e-06	1.124e-05
P08758	ANXA5	Annexin A5 OS=Homo sapiens GN=ANXA5 PE=1 SV=2	320	36004.5		58	14	48.4	Oxidation (M)	19.84	15.88	20.85	5.359e-06	6.294e-06	1.266e-05
P04843	RPN1	Dolichyl-diphosphooligosaccharide--protein glycosyltransferase subunit 1 OS=Homo sapiens GN=RPN1 PE=1 SV=1	607	68706.9		57	17	36.7	Carbamidomethyl (C),Gln->pyro-Glu (N-term Q),Oxidation (M)	17	19	19	3.089e-06	7.066e-06	5.617e-06
Q9UJZ1	STML2	Stomatin-like protein 2, mitochondrial OS=Homo sapiens GN=STOML2 PE=1 SV=1	356	38600.2		56	11	54.5		14.96	20.97	14.96	3.288e-06	6.798e-06	5.15e-06
Q86XF0	DYR2	Dihydrofolate reductase 2, mitochondrial OS=Homo sapiens GN=DHFR2 PE=1 SV=1	187	13161	tr|C9JJ68|C9JJ68_HUMAN;	55	6	36.8	Gln->pyro-Glu (N-term Q),Oxidation (M)	29	12	14	0.0002242	3.147e-05	5.271e-05
P22695	QCR2	Cytochrome b-c1 complex subunit 2, mitochondrial OS=Homo sapiens GN=UQCRC2 PE=1 SV=3	453	48539		54	15	44.2	Oxidation (M)	18.81	16.87	14.89	5.948e-06	3.552e-06	2.598e-06
P09651	ROA1	Heterogeneous nuclear ribonucleoprotein A1 OS=Homo sapiens GN=HNRNPA1 PE=1 SV=5	372	33224.9	tr|F8W6I7|F8W6I7_HUMAN;	54	14	50.5	Carbamidomethyl (C),Gln->pyro-Glu (N-term Q),Glu->pyro-Glu (N-term E),Oxidation (M)	13.78	15.72	22.6	4.338e-06	5.561e-06	1.094e-05
P62258	1433E	14-3-3 protein epsilon OS=Homo sapiens GN=YWHAE PE=1 SV=1	255	29227.5		53	14	56.9	Acetyl (Protein N-term),Carbamidomethyl (C),Oxidation (M)	12.96	19.94	17.93	5.225e-06	7.4e-06	1.018e-05
Q99714	HCD2	3-hydroxyacyl-CoA dehydrogenase type-2 OS=Homo sapiens GN=HSD17B10 PE=1 SV=3	261	26978.2		52	8	47.5	Oxidation (M)	11	23	18	3.283e-06	1.123e-05	1.304e-05
P05388	RLA0	60S acidic ribosomal protein P0 OS=Homo sapiens GN=RPLP0 PE=1 SV=1	317	34341.9		52	8	38.5	Carbamidomethyl (C)	14.05	15.13	14.68	3.341e-06	7.258e-06	7.682e-06
Q13838	DX39B	Spliceosome RNA helicase DDX39B OS=Homo sapiens GN=DDX39B PE=1 SV=1	428	49086		51	11	36.2	Acetyl (Protein N-term),Ammonia-loss (N-term C) + Carbamidomethyl (C),Carbamidomethyl (C),Oxidation (M)	13.5	21.24	12.54	1.005e-05	1.472e-05	9.105e-06
P45880	VDAC2	Voltage-dependent anion-selective channel protein 2 OS=Homo sapiens GN=VDAC2 PE=1 SV=2	294	30400.9	tr|A0A0A0MR02|A0A0A0MR02_HUMAN;	51	8	33.7		12.98	18.97	18.98	1.578e-05	2.416e-05	1.837e-05
P05141	ADT2	ADP/ATP translocase 2 OS=Homo sapiens GN=SLC25A5 PE=1 SV=7	298	32903.2		49	11	38.3	Acetyl (Protein N-term),Carbamidomethyl (C),Gln->pyro-Glu (N-term Q),Oxidation (M)	12	16.5	12	7.265e-06	1.571e-05	9.977e-06
O75390	CISY	Citrate synthase, mitochondrial OS=Homo sapiens GN=CS PE=1 SV=2	466	50525.8	tr|B4DJV2|B4DJV2_HUMAN;	49	10	40	Oxidation (M)	11.78	13.73	12.76	2.193e-06	4.612e-06	3.898e-06
P08195	4F2	4F2 cell-surface antigen heavy chain OS=Homo sapiens GN=SLC3A2 PE=1 SV=3	630	68238.9	tr|F5GZS6|F5GZS6_HUMAN;tr|J3KPF3|J3KPF3_HUMAN;	48	9	24.2		12	19.99	15	3.083e-06	7.652e-06	5.887e-06
P34897	GLYM	Serine hydroxymethyltransferase, mitochondrial OS=Homo sapiens GN=SHMT2 PE=1 SV=3	504	56101.8		48	15	37.9	Carbamidomethyl (C)	12.9	18.87	14.88	1.938e-06	2.986e-06	3.977e-06
P12956	XRCC6	X-ray repair cross-complementing protein 6 OS=Homo sapiens GN=XRCC6 PE=1 SV=2	609	64405.1	tr|B1AHC9|B1AHC9_HUMAN;	48	14	36.5	Gln->pyro-Glu (N-term Q),Oxidation (M)	11	16	16	1.159e-06	3.392e-06	4.84e-06
P04637	P53	Cellular tumor antigen p53 OS=Homo sapiens GN=TP53 PE=1 SV=4	393	45962.6	tr|A0A0U1RQC9|A0A0U1RQC9_HUMAN;	47	10	28.8	Gln->pyro-Glu (N-term Q),Oxidation (M)	21.57	14.7	7.85	2.342e-06	2.058e-06	1.438e-06
P14625	ENPL	Endoplasmin OS=Homo sapiens GN=HSP90B1 PE=1 SV=1	803	92645.5		45	17	25.4	Oxidation (M)	14.98	14.97	11.98	2.77e-06	3.006e-06	2.806e-06
Q92841	DDX17	Probable ATP-dependent RNA helicase DDX17 OS=Homo sapiens GN=DDX17 PE=1 SV=2	729	80420.2	tr|A0A1W2PQ51|A0A1W2PQ51_HUMAN;tr|A0A1X7SBZ2|A0A1X7SBZ2_HUMAN;	45	18	32.4	Carbamidomethyl (C),Oxidation (M)	14	10.5	14.5	2.652e-06	2.891e-06	3.509e-06
P04075	ALDOA	Fructose-bisphosphate aldolase A OS=Homo sapiens GN=ALDOA PE=1 SV=2	364	39900.6	tr|J3KPS3|J3KPS3_HUMAN;	44	12	43.1	Oxidation (M)	8.84	16.68	17.66	2.526e-06	9.187e-06	7.159e-06
Q15233	NONO	Non-POU domain-containing octamer-binding protein OS=Homo sapiens GN=NONO PE=1 SV=4	471	54323.4		44	10	25.3	Oxidation (M)	15.87	8.93	15.87	2.04e-06	1.746e-06	2.967e-06
P54886	P5CS	Delta-1-pyrroline-5-carboxylate synthase OS=Homo sapiens GN=ALDH18A1 PE=1 SV=2	795	87481.7		43	12	20.9	Gln->pyro-Glu (N-term Q),Oxidation (M)	18	13	11	1.618e-06	2.029e-06	1.782e-06
Q9UMS4	PRP19	Pre-mRNA-processing factor 19 OS=Homo sapiens GN=PRPF19 PE=1 SV=1	504	55290.4		43	12	44.2	Carbamidomethyl (C),Gln->pyro-Glu (N-term Q),Oxidation (M)	8.97	16.96	16.98	1.912e-06	4.078e-06	6.111e-06
O96008	TOM40	Mitochondrial import receptor subunit TOM40 homolog OS=Homo sapiens GN=TOMM40 PE=1 SV=1	361	37977.2		41	8	24.7	Gln->pyro-Glu (N-term Q),Oxidation (M)	10	18.98	10.98	1.667e-06	3.911e-06	2.57e-06
Q9H9B4	SFXN1	Sideroflexin-1 OS=Homo sapiens GN=SFXN1 PE=1 SV=4	322	35686.4		41	12	46.9	Gln->pyro-Glu (N-term Q),Oxidation (M)	9.9	11.94	11.9	6.077e-06	5.783e-06	5.51e-06
P24752	THIL	Acetyl-CoA acetyltransferase, mitochondrial OS=Homo sapiens GN=ACAT1 PE=1 SV=1	427	45296.7		40	9	30.7	Carbamidomethyl (C),Oxidation (M)	13.99	14.96	10.97	2.764e-06	4.372e-06	3.366e-06
P38919	IF4A3	Eukaryotic initiation factor 4A-III OS=Homo sapiens GN=EIF4A3 PE=1 SV=4	411	46949.2		40	15	45	Acetyl (Protein N-term),Oxidation (M)	9	15	10	2.427e-06	3.929e-06	3.655e-06
O14654	IRS4	Insulin receptor substrate 4 OS=Homo sapiens GN=IRS4 PE=1 SV=1	1257	134045		39	11	20.6	Carbamidomethyl (C),Gln->pyro-Glu (N-term Q)	17	9	12	5.036e-07	3.814e-07	3.199e-07
P38646	GRP75	Stress-70 protein, mitochondrial OS=Homo sapiens GN=HSPA9 PE=1 SV=2	679	73832.9		39	12	23.7	Oxidation (M)	11.98	14.97	11.97	1.388e-06	1.995e-06	1.94e-06
P10809	CH60	60 kDa heat shock protein, mitochondrial OS=Homo sapiens GN=HSPD1 PE=1 SV=2	573	61178.5		38	11	24.8	Oxidation (M)	13.92	11.92	10.95	2.256e-06	3.487e-06	2.84e-06
P08133	ANXA6	Annexin A6 OS=Homo sapiens GN=ANXA6 PE=1 SV=3	673	76023.7		38	18	43.2	Oxidation (M)	7.93	13.9	10.89	1.228e-06	3.449e-06	4.509e-06
Q00610	CLH1	Clathrin heavy chain 1 OS=Homo sapiens GN=CLTC PE=1 SV=5	1675	192422	tr|A0A087WVQ6|A0A087WVQ6_HUMAN;	38	11	10.1	Oxidation (M)	16	11	11	8.569e-07	7.603e-07	9.235e-07
P39656	OST48	Dolichyl-diphosphooligosaccharide--protein glycosyltransferase 48 kDa subunit OS=Homo sapiens GN=DDOST PE=1 SV=4	456	48895	tr|A0A0C4DGS1|A0A0C4DGS1_HUMAN;	38	9	40.3	Oxidation (M)	8	17	12	1.647e-06	3.831e-06	2.839e-06
Q12931	TRAP1	Heat shock protein 75 kDa, mitochondrial OS=Homo sapiens GN=TRAP1 PE=1 SV=3	704	80257.8		38	12	27	Oxidation (M)	11.93	12.93	12.93	2.969e-06	4.199e-06	3.533e-06
P00338	LDHA	L-lactate dehydrogenase A chain OS=Homo sapiens GN=LDHA PE=1 SV=2	332	36755.4		38	12	35.8	Acetyl (Protein N-term),Oxidation (M)	11.83	10.87	11.83	2.949e-06	5.087e-06	5.685e-06
P07195	LDHB	L-lactate dehydrogenase B chain OS=Homo sapiens GN=LDHB PE=1 SV=2	334	36705.2		38	12	46.4	Carbamidomethyl (C),Oxidation (M)	13.92	9.96	9.95	6.349e-06	7.424e-06	7.699e-06
P08559	ODPA	Pyruvate dehydrogenase E1 component subunit alpha, somatic form, mitochondrial OS=Homo sapiens GN=PDHA1 PE=1 SV=3	390	43375.7		38	9	29.7	Oxidation (M)	12.96	11.95	12.95	3.621e-06	6.706e-06	4.723e-06
P31930	QCR1	Cytochrome b-c1 complex subunit 1, mitochondrial OS=Homo sapiens GN=UQCRC1 PE=1 SV=3	480	52738.5		37	11	25.6	Carbamidomethyl (C),Oxidation (M)	10	17	10	4.017e-06	7.465e-06	4.641e-06
Q9Y5B9	SP16H	FACT complex subunit SPT16 OS=Homo sapiens GN=SUPT16H PE=1 SV=1	1047	120145		37	10	14	Acetyl (Protein N-term),Carbamidomethyl (C),Oxidation (M)	14	11	10	1.17e-06	1.113e-06	1.435e-06
P06733	ENOA	Alpha-enolase OS=Homo sapiens GN=ENO1 PE=1 SV=2	434	47265.4		36	11	37.6	Carbamidomethyl (C)	7	16.99	7	1.399e-06	6.432e-06	3.314e-06
Q09028	RBBP4	Histone-binding protein RBBP4 OS=Homo sapiens GN=RBBP4 PE=1 SV=3	425	47752.1		36	11	40	Acetyl (Protein N-term),Carbamidomethyl (C)	8.95	14.95	10.95	3.907e-06	6.711e-06	6.103e-06
Q12906	ILF3	Interleukin enhancer-binding factor 3 OS=Homo sapiens GN=ILF3 PE=1 SV=3	894	95531.2		36	13	20.8	Oxidation (M)	10	13	13	1.15e-06	1.168e-06	1.496e-06
P14618	KPYM	Pyruvate kinase PKM OS=Homo sapiens GN=PKM PE=1 SV=4	531	58044.1		36	11	31.5	Carbamidomethyl (C),Oxidation (M)	13.76	12.79	7.9	3.662e-06	3.627e-06	2.618e-06
P06493	CDK1	Cyclin-dependent kinase 1 OS=Homo sapiens GN=CDK1 PE=1 SV=3	297	34131.9	tr|A0A024QZP7|A0A024QZP7_HUMAN;	35	11	48.5		10.48	11.05	4.53	5.851e-06	3.827e-06	2.49e-06
Q08945	SSRP1	FACT complex subunit SSRP1 OS=Homo sapiens GN=SSRP1 PE=1 SV=1	709	81222.5		35	11	17.9	Acetyl (Protein N-term),Carbamidomethyl (C)	9	14	12	1.352e-06	2.43e-06	2.173e-06
Q7KZF4	SND1	Staphylococcal nuclease domain-containing protein 1 OS=Homo sapiens GN=SND1 PE=1 SV=1	910	102204		35	13	22.2	Oxidation (M)	5	13	14	2.008e-07	1.022e-06	1.254e-06
Q15029	U5S1	116 kDa U5 small nuclear ribonucleoprotein component OS=Homo sapiens GN=EFTUD2 PE=1 SV=1	972	109654		34	15	22.4	Carbamidomethyl (C),Oxidation (M)	11.96	11.95	5.99	1.117e-06	1.096e-06	4.422e-07
Q14697	GANAB	Neutral alpha-glucosidase AB OS=Homo sapiens GN=GANAB PE=1 SV=3	944	107077		34	12	20.7	Oxidation (M)	8.94	8.95	10.91	1.612e-06	2.084e-06	2.363e-06
P23396	RS3	40S ribosomal protein S3 OS=Homo sapiens GN=RPS3 PE=1 SV=2	243	26743.5		33	11	53.9	Carbamidomethyl (C),Oxidation (M)	6.87	10.72	13.69	2.622e-06	5.258e-06	6.862e-06
P22626	ROA2	Heterogeneous nuclear ribonucleoproteins A2/B1 OS=Homo sapiens GN=HNRNPA2B1 PE=1 SV=2	353	37496.8		33	9	30.6	Glu->pyro-Glu (N-term E)	9	11	12	1.76e-06	5.143e-06	6.827e-06
P39023	RL3	60S ribosomal protein L3 OS=Homo sapiens GN=RPL3 PE=1 SV=2	403	46187.8		32	8	25.6	Carbamidomethyl (C),Oxidation (M)	6.89	13.78	10.87	1.581e-06	4.202e-06	3.577e-06
P33993	MCM7	DNA replication licensing factor MCM7 OS=Homo sapiens GN=MCM7 PE=1 SV=4	719	81454.7		32	11	21.4	Oxidation (M)	11	9	11	1.271e-06	9.627e-07	2.618e-06
O75533	SF3B1	Splicing factor 3B subunit 1 OS=Homo sapiens GN=SF3B1 PE=1 SV=3	1304	146116		32	11	14.8	Oxidation (M)	11	9	10	9.003e-07	4.715e-07	7.532e-07
P84090	ERH	Enhancer of rudimentary homolog OS=Homo sapiens GN=ERH PE=1 SV=1	104	12269		31	3	28.8	Acetyl (Protein N-term),Oxidation (M)	9	10	11	3.126e-05	2.983e-05	4.476e-05
P51991	ROA3	Heterogeneous nuclear ribonucleoprotein A3 OS=Homo sapiens GN=HNRNPA3 PE=1 SV=2	378	39678.6		31	8	23.5	Glu->pyro-Glu (N-term E)	10	11	10	1.76e-06	2.866e-06	4.738e-06
P31040	SDHA	Succinate dehydrogenase [ubiquinone] flavoprotein subunit, mitochondrial OS=Homo sapiens GN=SDHA PE=1 SV=2	664	72843.4		31	8	16	Oxidation (M)	8.92	10.92	9.93	1.451e-06	2.372e-06	2.845e-06
P50991	TCPD	T-complex protein 1 subunit delta OS=Homo sapiens GN=CCT4 PE=1 SV=4	539	58031.8		31	7	24.1	Oxidation (M)	9	14	7	1.243e-06	2.004e-06	1.392e-06
P35613	BASI	Basigin OS=Homo sapiens GN=BSG PE=1 SV=2	385	23935	tr|A0A087X2B5|A0A087X2B5_HUMAN;	30	5	29.4	Oxidation (M)	9.85	9.85	7.88	3.974e-06	7.129e-06	7.078e-06
P62805	H4	Histone H4 OS=Homo sapiens GN=HIST1H4A PE=1 SV=2	103	11378.4		30	5	50.5	Oxidation (M)	4	10	14	1.069e-05	1.759e-05	3.979e-05
Q15366	PCBP2	Poly(rC)-binding protein 2 OS=Homo sapiens GN=PCBP2 PE=1 SV=1	365	31783.4	tr|F8VZX2|F8VZX2_HUMAN;tr|H3BRU6|H3BRU6_HUMAN;	30	8	48.8	Carbamidomethyl (C),Oxidation (M)	8.87	12.8	5.94	2.533e-06	6.497e-06	3.752e-06
P21912	SDHB	Succinate dehydrogenase [ubiquinone] iron-sulfur subunit, mitochondrial OS=Homo sapiens GN=SDHB PE=1 SV=3	280	31680.9		30	8	33.6	Oxidation (M)	7.96	7.94	10.92	4.174e-06	6.968e-06	8.091e-06
P40939	ECHA	Trifunctional enzyme subunit alpha, mitochondrial OS=Homo sapiens GN=HADHA PE=1 SV=2	763	83163		30	12	23.6	Oxidation (M)	6	14	9	5.344e-07	2.29e-06	2.08e-06
P38159	RBMX	RNA-binding motif protein, X chromosome OS=Homo sapiens GN=RBMX PE=1 SV=3	391	42414.4		29	11	28.1	Acetyl (Protein N-term)	7.86	8.84	10.8	3.406e-06	2.441e-06	4.003e-06
P55072	TERA	Transitional endoplasmic reticulum ATPase OS=Homo sapiens GN=VCP PE=1 SV=4	806	89499.9		29	9	16.1	Acetyl (Protein N-term),Oxidation (M)	11	10	6	7.457e-07	1.04e-06	5.875e-07
P50213	IDH3A	Isocitrate dehydrogenase [NAD] subunit alpha, mitochondrial OS=Homo sapiens GN=IDH3A PE=1 SV=1	366	39674.1		28	7	26.2	Oxidation (M)	10.89	7.91	7.92	3.661e-06	4.613e-06	4.01e-06
Q07065	CKAP4	Cytoskeleton-associated protein 4 OS=Homo sapiens GN=CKAP4 PE=1 SV=2	602	66162.8		27	9	20.3		5.98	10	7.96	1.355e-06	1.787e-06	1.681e-06
P04844	RPN2	Dolichyl-diphosphooligosaccharide--protein glycosyltransferase subunit 2 OS=Homo sapiens GN=RPN2 PE=1 SV=3	631	69421.1		27	9	23.1	Gln->pyro-Glu (N-term Q),Oxidation (M)	9.94	5.96	7.95	7.196e-07	1.339e-06	1.714e-06
P26641	EF1G	Elongation factor 1-gamma OS=Homo sapiens GN=EEF1G PE=1 SV=3	437	50213.2		27	9	21.5	Acetyl (Protein N-term),Gln->pyro-Glu (N-term Q)	5	10	7	1.16e-06	2.483e-06	2.27e-06
P49327	FAS	Fatty acid synthase OS=Homo sapiens GN=FASN PE=1 SV=3	2511	273765	tr|A0A0U1RQF0|A0A0U1RQF0_HUMAN;	27	9	6.9		6	8	8	9.643e-08	2.767e-07	3.545e-07
P67809	YBOX1	Nuclease-sensitive element-binding protein 1 OS=Homo sapiens GN=YBX1 PE=1 SV=3	324	35992.7		27	5	25.9	Oxidation (M)	2.98	8.96	12.93	5.739e-07	2.035e-06	3.178e-06
Q9Y3I0	RTCB	tRNA-splicing ligase RtcB homolog OS=Homo sapiens GN=RTCB PE=1 SV=1	505	55318.9		27	10	31.1	Gln->pyro-Glu (N-term Q),Oxidation (M)	7	11	6	2.267e-06	1.323e-06	9.93e-07
P36578	RL4	60S ribosomal protein L4 OS=Homo sapiens GN=RPL4 PE=1 SV=5	427	47793.5		26	9	27.4	Oxidation (M)	2.99	9.95	9.96	4.616e-07	3.518e-06	3.782e-06
Q9NVI7	ATD3A	ATPase family AAA domain-containing protein 3A OS=Homo sapiens GN=ATAD3A PE=1 SV=2	634	64479.4	tr|H0Y2W2|H0Y2W2_HUMAN;	26	7	15		10.98	5.98	7.99	2e-06	1.577e-06	1.96e-06
Q9NZI8	IF2B1	Insulin-like growth factor 2 mRNA-binding protein 1 OS=Homo sapiens GN=IGF2BP1 PE=1 SV=2	577	63603.3		26	9	20.1	Carbamidomethyl (C),Oxidation (M)	5	8	12	7.534e-07	2.101e-06	2.533e-06
P04181	OAT	Ornithine aminotransferase, mitochondrial OS=Homo sapiens GN=OAT PE=1 SV=1	439	48630.3		25	8	22.8		6	12	7	8.483e-07	2.108e-06	1.452e-06
Q16630	CPSF6	Cleavage and polyadenylation specificity factor subunit 6 OS=Homo sapiens GN=CPSF6 PE=1 SV=2	551	52363.9	tr|F8WJN3|F8WJN3_HUMAN;	24	6	18.8	Carbamidomethyl (C)	6	7	7	7.278e-07	1.291e-06	1.699e-06
P56537	IF6	Eukaryotic translation initiation factor 6 OS=Homo sapiens GN=EIF6 PE=1 SV=1	245	26654.2		24	4	36.7	Carbamidomethyl (C),Oxidation (M)	6	11	6	1.592e-06	4.567e-06	2.561e-06
O00264	PGRC1	Membrane-associated progesterone receptor component 1 OS=Homo sapiens GN=PGRMC1 PE=1 SV=3	195	21711.8		23	6	38.5		8	4	7	4.224e-06	1.895e-06	5.469e-06
P07197	NFM	Neurofilament medium polypeptide OS=Homo sapiens GN=NEFM PE=1 SV=3	916	98574.4	tr|E7ESP9|E7ESP9_HUMAN;	23	10	15.2		11	7	5	7.123e-07	5.994e-07	4.371e-07
P17987	TCPA	T-complex protein 1 subunit alpha OS=Homo sapiens GN=TCP1 PE=1 SV=1	556	60467.7		23	9	28.4	Oxidation (M)	5.94	4.93	5.94	1.308e-06	4.08e-07	1.95e-06
P49368	TCPG	T-complex protein 1 subunit gamma OS=Homo sapiens GN=CCT3 PE=1 SV=4	545	55782.8	tr|B4DUR8|B4DUR8_HUMAN;	23	9	28.4	Carbamidomethyl (C),Oxidation (M)	8.94	8.94	3.98	1.014e-06	1.884e-06	7.231e-07
O43390	HNRPR	Heterogeneous nuclear ribonucleoprotein R OS=Homo sapiens GN=HNRNPR PE=1 SV=1	633	71079.4		22	6	11.7		6	6.99	8.99	3.809e-07	1.137e-06	1.65e-06
Q16777	H2A2C	Histone H2A type 2-C OS=Homo sapiens GN=HIST2H2AC PE=1 SV=4	129	14122.9	sp|Q6FI13|H2A2A_HUMAN;	22	6	58.1	Oxidation (M)	3.98	6.95	8.96	1.685e-06	4.956e-06	1.048e-05
Q96AG4	LRC59	Leucine-rich repeat-containing protein 59 OS=Homo sapiens GN=LRRC59 PE=1 SV=1	307	34998.9		22	6	25.4		6	9	7	3.267e-06	4.732e-06	5.168e-06
P13797	PLST	Plastin-3 OS=Homo sapiens GN=PLS3 PE=1 SV=4	630	69470.7	tr|A0A0A0MSQ0|A0A0A0MSQ0_HUMAN;	22	9	20.7	Oxidation (M)	5.97	8.96	4.99	9.243e-07	2.749e-06	9.074e-07
Q9BSJ8	ESYT1	Extended synaptotagmin-1 OS=Homo sapiens GN=ESYT1 PE=1 SV=1	1104	123104		21	6	9.7		4	11	6	2.131e-07	1.105e-06	4.56e-07
Q15365	PCBP1	Poly(rC)-binding protein 1 OS=Homo sapiens GN=PCBP1 PE=1 SV=2	356	37564		21	6	26.1	Carbamidomethyl (C),Gln->pyro-Glu (N-term Q),Oxidation (M)	5	5	6	1.821e-06	1.975e-06	2.888e-06
Q9Y265	RUVB1	RuvB-like 1 OS=Homo sapiens GN=RUVBL1 PE=1 SV=1	456	50322.4		21	5	15.8		7.95	6.96	5.96	1.271e-06	1.469e-06	1.518e-06
O75643	U520	U5 small nuclear ribonucleoprotein 200 kDa helicase OS=Homo sapiens GN=SNRNP200 PE=1 SV=2	2136	244983		21	13	10.4	Oxidation (M)	8	6	6	2.791e-07	2.543e-07	2.418e-07
P62081	RS7	40S ribosomal protein S7 OS=Homo sapiens GN=RPS7 PE=1 SV=1	194	22167.3		20	6	44.8	Oxidation (M)	6	5	9	1.298e-06	2.084e-06	5.889e-06
P78527	PRKDC	DNA-dependent protein kinase catalytic subunit OS=Homo sapiens GN=PRKDC PE=1 SV=3	4128	470013		20	11	3.8	Gln->pyro-Glu (N-term Q),Oxidation (M)	9	5	5	8.347e-08	1.232e-07	9.502e-08
Q16836	HCDH	Hydroxyacyl-coenzyme A dehydrogenase, mitochondrial OS=Homo sapiens GN=HADH PE=1 SV=3	314	42204.9	tr|A0A0A0MSE2|A0A0A0MSE2_HUMAN;tr|A0A0D9SFP2|A0A0D9SFP2_HUMAN;tr|A0A1W2PNM1|A0A1W2PNM1_HUMAN;tr|E9PF18|E9PF18_HUMAN;	20	5	32.6	Oxidation (M)	6.93	5.94	6.93	1.767e-06	2.364e-06	3.754e-06
Q3ZCQ8	TIM50	Mitochondrial import inner membrane translocase subunit TIM50 OS=Homo sapiens GN=TIMM50 PE=1 SV=2	353	39711.6		20	5	20.4		6.97	6.97	5.97	9.212e-07	2.496e-06	1.775e-06
Q15084	PDIA6	Protein disulfide-isomerase A6 OS=Homo sapiens GN=PDIA6 PE=1 SV=1	440	48217.3		20	4	14.5		7	6	7	1.448e-06	1.852e-06	3.379e-06
P51149	RAB7A	Ras-related protein Rab-7a OS=Homo sapiens GN=RAB7A PE=1 SV=1	207	23528.9		20	5	28.5		6.99	5.98	6.98	3.051e-06	3.721e-06	4.617e-06
P50990	TCPQ	T-complex protein 1 subunit theta OS=Homo sapiens GN=CCT8 PE=1 SV=4	548	59744.6		20	7	14.6		4	6	7	7.518e-07	1.399e-06	1.187e-06
P26373	RL13	60S ribosomal protein L13 OS=Homo sapiens GN=RPL13 PE=1 SV=4	211	24300.6		19	4	19.9	Oxidation (M)	5	6.99	5.99	2.648e-06	3.815e-06	4.719e-06
Q02878	RL6	60S ribosomal protein L6 OS=Homo sapiens GN=RPL6 PE=1 SV=3	288	32779.7		19	6	24.3	Gln->pyro-Glu (N-term Q)	6	6	7	1.012e-06	1.076e-06	1.687e-06
P55265	DSRAD	Double-stranded RNA-specific adenosine deaminase OS=Homo sapiens GN=ADAR PE=1 SV=4	1226	136341		19	9	8.6	Oxidation (M)	3	8	6	2.106e-07	5.494e-07	4.41e-07
O75431	MTX2	Metaxin-2 OS=Homo sapiens GN=MTX2 PE=1 SV=1	263	25755	tr|C9JAZ1|C9JAZ1_HUMAN;	19	3	34.5	Acetyl (Protein N-term)	4.95	4.95	6.93	1.648e-06	3.085e-06	4.161e-06
Q92621	NU205	Nuclear pore complex protein Nup205 OS=Homo sapiens GN=NUP205 PE=1 SV=3	2012	228371		19	11	10.1	Carbamidomethyl (C),Glu->pyro-Glu (N-term E),Oxidation (M)	8	3	5	2.253e-07	1.652e-07	1.919e-07
Q13263	TIF1B	Transcription intermediary factor 1-beta OS=Homo sapiens GN=TRIM28 PE=1 SV=5	835	48530	tr|M0R0K9|M0R0K9_HUMAN;	19	3	11.3	Oxidation (M)	5	6	8	5.82e-07	1.027e-06	1.423e-06
P62701	RS4X	40S ribosomal protein S4, X isoform OS=Homo sapiens GN=RPS4X PE=1 SV=2	263	29651.1		18	7	26.2	Oxidation (M)	4.99	5.98	5	3.3e-06	4.964e-06	3.167e-06
P61204	ARF3	ADP-ribosylation factor 3 OS=Homo sapiens GN=ARF3 PE=1 SV=2	181	20737.7	sp|P84077|ARF1_HUMAN;	18	5	39.8	Oxidation (M)	2.97	6.9	7.9	1.066e-06	4.344e-06	5.015e-06
P52597	HNRPF	Heterogeneous nuclear ribonucleoprotein F OS=Homo sapiens GN=HNRNPF PE=1 SV=3	415	45750.9		18	5	16.1		2.95	7.91	5.92	5.359e-07	2.81e-06	2.263e-06
P51659	DHB4	Peroxisomal multifunctional enzyme type 2 OS=Homo sapiens GN=HSD17B4 PE=1 SV=3	736	79852.4		18	6	13.2		3.95	8.91	4.94	3.706e-07	1.62e-06	1.244e-06
Q7L2E3	DHX30	Putative ATP-dependent RNA helicase DHX30 OS=Homo sapiens GN=DHX30 PE=1 SV=1	1194	130811	tr|H7BXY3|H7BXY3_HUMAN;	18	7	7.6		3	3	1	2.115e-07	2.946e-07	6.365e-08
P30048	PRDX3	Thioredoxin-dependent peroxide reductase, mitochondrial OS=Homo sapiens GN=PRDX3 PE=1 SV=3	256	27747.2		18	4	17.2		4	7	6	1.463e-06	3.918e-06	4.086e-06
P27348	1433T	14-3-3 protein theta OS=Homo sapiens GN=YWHAQ PE=1 SV=1	245	27818.8		17	7	32.7	Oxidation (M)	6	5	5	1.753e-06	1.096e-06	1.831e-06
Q53H12	AGK	Acylglycerol kinase, mitochondrial OS=Homo sapiens GN=AGK PE=1 SV=2	422	43877.7	tr|E9PC15|E9PC15_HUMAN;	17	4	14		5.94	6.92	2.97	8.129e-07	3.003e-06	2.001e-06
P07355	ANXA2	Annexin A2 OS=Homo sapiens GN=ANXA2 PE=1 SV=2	339	38669.9		17	5	20.6		6.88	4.92	4.93	1.667e-06	2.064e-06	1.964e-06
P31689	DNJA1	DnaJ homolog subfamily A member 1 OS=Homo sapiens GN=DNAJA1 PE=1 SV=2	397	44947.5		17	6	22.2	Carbamidomethyl (C)	5	4	4	1.087e-06	3.318e-07	3.987e-07
P55060	XPO2	Exportin-2 OS=Homo sapiens GN=CSE1L PE=1 SV=3	971	110634		17	8	13.7	Oxidation (M)	8	5	4	1.779e-06	1.249e-06	3.044e-07
Q71DI3	H32	Histone H3.2 OS=Homo sapiens GN=HIST2H3A PE=1 SV=3	136	15414.5		17	3	35.3	Carbamidomethyl (C),Oxidation (M)	4	6	6	3.509e-06	7.486e-06	1.112e-05
P23284	PPIB	Peptidyl-prolyl cis-trans isomerase B OS=Homo sapiens GN=PPIB PE=1 SV=2	216	23781.6		17	5	25.9	Oxidation (M)	4	5	8	2.347e-06	4.028e-06	7.55e-06
P40227	TCPZ	T-complex protein 1 subunit zeta OS=Homo sapiens GN=CCT6A PE=1 SV=3	531	58131.7		17	7	18.3		4	8	4	6.124e-07	1.248e-06	7.105e-07
P45974	UBP5	Ubiquitin carboxyl-terminal hydrolase 5 OS=Homo sapiens GN=USP5 PE=1 SV=2	858	95977.5		17	6	11	Acetyl (Protein N-term)	10	1	4	7.039e-07	4.283e-08	4.078e-07
P31946	1433B	14-3-3 protein beta/alpha OS=Homo sapiens GN=YWHAB PE=1 SV=3	246	28136.9		16	6	24.8	Oxidation (M)	7	4	5	2.042e-06	1.537e-06	2.542e-06
P36542	ATPG	ATP synthase subunit gamma, mitochondrial OS=Homo sapiens GN=ATP5C1 PE=1 SV=1	298	33047.3		16	3	17.8		7	6	3	1.447e-06	1.949e-06	8.289e-07
Q92499	DDX1	ATP-dependent RNA helicase DDX1 OS=Homo sapiens GN=DDX1 PE=1 SV=2	740	74048.5	tr|A0A087X2G1|A0A087X2G1_HUMAN;tr|F1T0B3|F1T0B3_HUMAN;	16	6	15.8	Oxidation (M)	4	5	5	3.951e-07	7.118e-07	6.779e-07
Q99615	DNJC7	DnaJ homolog subfamily C member 7 OS=Homo sapiens GN=DNAJC7 PE=1 SV=2	494	56548.8		16	3	5.7		6	5	4	2.427e-07	2.018e-07	1.517e-07
Q15717	ELAV1	ELAV-like protein 1 OS=Homo sapiens GN=ELAVL1 PE=1 SV=2	326	36159.2		16	4	12		5	5	6	3.169e-07	1.37e-06	1.154e-06
P07196	NFL	Neurofilament light polypeptide OS=Homo sapiens GN=NEFL PE=1 SV=3	543	61641.3		16	10	26.3	Gln->pyro-Glu (N-term Q),Oxidation (M)	4	8	4	3.133e-07	5.764e-07	4.346e-07
Q15758	AAAT	Neutral amino acid transporter B(0) OS=Homo sapiens GN=SLC1A5 PE=1 SV=2	541	56724.3		16	4	11.1	Oxidation (M)	3.98	7.97	3.98	3.036e-07	1.198e-06	9.644e-07
O43143	DHX15	Pre-mRNA-splicing factor ATP-dependent RNA helicase DHX15 OS=Homo sapiens GN=DHX15 PE=1 SV=2	795	91109.3		16	5	10.1	Oxidation (M)	5	6	4	3.227e-07	5.969e-07	4.787e-07
P22087	FBRL	rRNA 2'-O-methyltransferase fibrillarin OS=Homo sapiens GN=FBL PE=1 SV=2	321	29236.1	tr|M0QXL5|M0QXL5_HUMAN;tr|M0R0P1|M0R0P1_HUMAN;tr|M0R299|M0R299_HUMAN;tr|M0R2Q4|M0R2Q4_HUMAN;	16	3	18		6.93	3.96	1.98	7.941e-06	3.896e-06	1.545e-06
P78371	TCPB	T-complex protein 1 subunit beta OS=Homo sapiens GN=CCT2 PE=1 SV=4	535	44892.7	tr|F5GWF6|F5GWF6_HUMAN;tr|F8VQ14|F8VQ14_HUMAN;	16	6	21.2	Acetyl (Protein N-term)	3	7	4	1.224e-07	1.182e-06	6.487e-07
P61313	RL15	60S ribosomal protein L15 OS=Homo sapiens GN=RPL15 PE=1 SV=2	204	24185.1		15	5	26		3.99	5	5.99	1.684e-06	2.114e-06	2.651e-06
Q96CS3	FAF2	FAS-associated factor 2 OS=Homo sapiens GN=FAF2 PE=1 SV=2	445	52716.6		15	4	12.1	Acetyl (Protein N-term)	4	4	1	5.993e-07	7.414e-07	2.703e-07
P62873	GBB1	Guanine nucleotide-binding protein G(I)/G(S)/G(T) subunit beta-1 OS=Homo sapiens GN=GNB1 PE=1 SV=3	340	18450.2	tr|B1AKQ8|B1AKQ8_HUMAN;tr|F6UT28|F6UT28_HUMAN;	15	4	45.8	Acetyl (Protein N-term),Carbamidomethyl (C)	2.28	7.28	1.64	4.437e-07	2.471e-06	5.385e-07
P16104	H2AX	Histone H2AX OS=Homo sapiens GN=H2AFX PE=1 SV=2	143	15171.4		15	6	52.4		0.99	6.92	6.92	1.284e-07	1.892e-06	2.887e-06
O75694	NU155	Nuclear pore complex protein Nup155 OS=Homo sapiens GN=NUP155 PE=1 SV=1	1391	148396	tr|E9PF10|E9PF10_HUMAN;	15	7	6.1		4	6	4	1.761e-07	3.456e-07	2.163e-07
Q9NR30	DDX21	Nucleolar RNA helicase 2 OS=Homo sapiens GN=DDX21 PE=1 SV=5	783	87524.5		15	9	17.2	Oxidation (M)	2	8	4	6.928e-08	9.285e-07	2.839e-07
Q14683	SMC1A	Structural maintenance of chromosomes protein 1A OS=Homo sapiens GN=SMC1A PE=1 SV=2	1233	141132	tr|G8JLG1|G8JLG1_HUMAN;	15	10	7.6	Oxidation (M)	5	3	1	1.015e-07	1.187e-07	2.114e-08
P68371	TBB4B	Tubulin beta-4B chain OS=Homo sapiens GN=TUBB4B PE=1 SV=1	445	49925.1		15	25	73.5	Carbamidomethyl (C),Oxidation (M)	4.91	4.88	2.94	1.023e-06	1.582e-06	1.746e-06
P62913	RL11	60S ribosomal protein L11 OS=Homo sapiens GN=RPL11 PE=1 SV=2	178	20275.7		14	5	28.7	Acetyl (Protein N-term),Carbamidomethyl (C)	6	4	4	2.516e-06	3.269e-06	5.16e-06
Q99798	ACON	Aconitate hydratase, mitochondrial OS=Homo sapiens GN=ACO2 PE=1 SV=2	780	87999.1	tr|A2A274|A2A274_HUMAN;	14	3	7.7		3	7	4	1.303e-07	9.741e-07	6.841e-07
Q07021	C1QBP	Complement component 1 Q subcomponent-binding protein, mitochondrial OS=Homo sapiens GN=C1QBP PE=1 SV=1	282	20029.6	tr|I3L3B0|I3L3B0_HUMAN;tr|I3L3Q7|I3L3Q7_HUMAN;	14	2	28.2		5	5	4	7.032e-07	9.347e-07	1.435e-06
Q13151	ROA0	Heterogeneous nuclear ribonucleoprotein A0 OS=Homo sapiens GN=HNRNPA0 PE=1 SV=1	305	30911.8		14	6	24.9		3	4	6	8.685e-07	1.667e-06	4.776e-06
Q13547	HDAC1	Histone deacetylase 1 OS=Homo sapiens GN=HDAC1 PE=1 SV=1	482	55211.8		14	4	10.6	Oxidation (M)	2.53	2.04	2.04	3.554e-07	2.888e-07	4.92e-07
Q07666	KHDR1	KH domain-containing, RNA-binding, signal transduction-associated protein 1 OS=Homo sapiens GN=KHDRBS1 PE=1 SV=1	443	48323.3		14	6	16	Oxidation (M)	5	4	3	1.138e-06	1.242e-06	1.112e-06
I3L223	I3L223	Leucine-rich repeat-containing protein 59 OS=Homo sapiens GN=LRRC59 PE=1 SV=1	62	6713.61		14	2	46.8		4	2	3	5.395e-05	3.897e-05	4.189e-05
Q9Y6C9	MTCH2	Mitochondrial carrier homolog 2 OS=Homo sapiens GN=MTCH2 PE=1 SV=1	303	33398.9		14	2	14.9	Acetyl (Protein N-term),Oxidation (M)	6	4	4	8.02e-07	6.602e-07	9.822e-07
O75489	NDUS3	NADH dehydrogenase [ubiquinone] iron-sulfur protein 3, mitochondrial OS=Homo sapiens GN=NDUFS3 PE=1 SV=1	264	30294.8		14	5	25	Gln->pyro-Glu (N-term Q)	3.98	3.99	4.98	4.808e-07	1.725e-06	2.208e-06
Q15393	SF3B3	Splicing factor 3B subunit 3 OS=Homo sapiens GN=SF3B3 PE=1 SV=4	1217	135852		14	6	5.5	Oxidation (M)	4	5	4	3.756e-07	5.009e-07	2.338e-07
P02786	TFR1	Transferrin receptor protein 1 OS=Homo sapiens GN=TFRC PE=1 SV=2	760	85034.1		14	5	11.2		3	5	5	3.091e-07	8.215e-07	5.846e-07
P07814	SYEP	Bifunctional glutamate/proline--tRNA ligase OS=Homo sapiens GN=EPRS PE=1 SV=5	1512	170933		13	4	4.8		4	2	3	6.588e-08	3.733e-08	1.072e-07
P34932	HSP74	Heat shock 70 kDa protein 4 OS=Homo sapiens GN=HSPA4 PE=1 SV=4	840	94505.4		13	6	9.5			6	7		4.807e-07	6.99e-07
Q16576	RBBP7	Histone-binding protein RBBP7 OS=Homo sapiens GN=RBBP7 PE=1 SV=1	425	47016.9	tr|E9PC52|E9PC52_HUMAN;	13	8	26.7	Carbamidomethyl (C)	2.97	4.95	4.95	3.55e-07	7.74e-07	1.49e-06
O95202	LETM1	Mitochondrial proton/calcium exchanger protein OS=Homo sapiens GN=LETM1 PE=1 SV=1	739	83518.1		13	5	10.7		3	7	2	3.16e-07	7.684e-07	3.164e-07
Q8N1F7	NUP93	Nuclear pore complex protein Nup93 OS=Homo sapiens GN=NUP93 PE=1 SV=2	819	99744.4	tr|H3BVG0|H3BVG0_HUMAN;	13	5	9.6	Acetyl (Protein N-term),Oxidation (M)	2.97	3.96	4.95	2.501e-07	5.675e-07	6.664e-07
P84103	SRSF3	Serine/arginine-rich splicing factor 3 OS=Homo sapiens GN=SRSF3 PE=1 SV=1	164	10332	tr|A0A087X2D0|A0A087X2D0_HUMAN;	13	2	31.6		5	4	4	3.377e-06	3.457e-06	5.929e-06
P30153	2AAA	Serine/threonine-protein phosphatase 2A 65 kDa regulatory subunit A alpha isoform OS=Homo sapiens GN=PPP2R1A PE=1 SV=4	589	45682.9	tr|B3KQV6|B3KQV6_HUMAN;	13	6	21.5	Gln->pyro-Glu (N-term Q)	3	5	3	2.115e-07	6.881e-07	2.862e-07
P23246	SFPQ	Splicing factor, proline- and glutamine-rich OS=Homo sapiens GN=SFPQ PE=1 SV=2	707	76299.7		13	6	11.5	Oxidation (M)	3	3	5	1.099e-07	2.028e-07	4.554e-07
P48643	TCPE	T-complex protein 1 subunit epsilon OS=Homo sapiens GN=CCT5 PE=1 SV=1	541	57251.6	tr|B7ZAR1|B7ZAR1_HUMAN;tr|E9PCA1|E9PCA1_HUMAN;	13	3	11.3		2	5	5	2.35e-08	3.961e-07	4.987e-07
P09661	RU2A	U2 small nuclear ribonucleoprotein A' OS=Homo sapiens GN=SNRPA1 PE=1 SV=2	255	28470.2		13	5	36.5	Carbamidomethyl (C)	4	3	4	6.262e-07	5.633e-07	1.039e-06
P62241	RS8	40S ribosomal protein S8 OS=Homo sapiens GN=RPS8 PE=1 SV=2	208	21920	tr|Q5JR95|Q5JR95_HUMAN;	12	3	20.7		3	3	5	9.525e-07	1.695e-06	2.78e-06
P18124	RL7	60S ribosomal protein L7 OS=Homo sapiens GN=RPL7 PE=1 SV=1	248	24471.4	tr|A8MUD9|A8MUD9_HUMAN;	12	4	20.7		2	4	4	1.39e-06	2.639e-06	2.55e-06
P12236	ADT3	ADP/ATP translocase 3 OS=Homo sapiens GN=SLC25A6 PE=1 SV=4	298	32917.2		12	10	29.5	Acetyl (Protein N-term),Carbamidomethyl (C),Oxidation (M)	2.98	4.99	3.99	5.59e-07	1.99e-06	1.323e-06
P25205	MCM3	DNA replication licensing factor MCM3 OS=Homo sapiens GN=MCM3 PE=1 SV=3	808	91158.2		12	4	6.8	Oxidation (M)	3	3	5	2.299e-07	3.756e-07	6.71e-07
Q14566	MCM6	DNA replication licensing factor MCM6 OS=Homo sapiens GN=MCM6 PE=1 SV=1	821	93065.4		12	6	8.9		4	5	1	2.957e-07	9.648e-07	7.126e-08
P00367	DHE3	Glutamate dehydrogenase 1, mitochondrial OS=Homo sapiens GN=GLUD1 PE=1 SV=2	558	61521.3		12	7	15.1		3	2	5	9.448e-07	6.245e-07	1.72e-06
Q03252	LMNB2	Lamin-B2 OS=Homo sapiens GN=LMNB2 PE=1 SV=4	620	70085.8		12	11	15.2	Oxidation (M)	4	1	6	3.925e-07	1.731e-07	7.628e-07
Q9NS69	TOM22	Mitochondrial import receptor subunit TOM22 homolog OS=Homo sapiens GN=TOMM22 PE=1 SV=3	142	15547.8		12	3	33.8	Oxidation (M)	4	4	3	1.491e-06	1.575e-06	2.013e-06
Q9H307	PININ	Pinin OS=Homo sapiens GN=PNN PE=1 SV=4	717	81763.1		12	5	9.5		4	4	2	4.256e-07	4.606e-07	1.817e-07
P26368	U2AF2	Splicing factor U2AF 65 kDa subunit OS=Homo sapiens GN=U2AF2 PE=1 SV=4	475	53593.3		12	5	18.5	Carbamidomethyl (C)	4	4	4	6.233e-07	1.118e-06	8.32e-07
P61586	RHOA	Transforming protein RhoA OS=Homo sapiens GN=RHOA PE=1 SV=1	193	21808.1		12	2	18.7	Oxidation (M)	6	3	3	8.01e-07	8.19e-07	4.961e-07
Q9BVK6	TMED9	Transmembrane emp24 domain-containing protein 9 OS=Homo sapiens GN=TMED9 PE=1 SV=2	235	27314.2		12	3	12.8		5	5	2	1.399e-06	1.748e-06	6.854e-07
P43686	PRS6B	26S proteasome regulatory subunit 6B OS=Homo sapiens GN=PSMC4 PE=1 SV=2	418	47444.6		11	4	20.8		4	2	2	4.932e-07	5.478e-07	7.252e-07
P62263	RS14	40S ribosomal protein S14 OS=Homo sapiens GN=RPS14 PE=1 SV=3	151	16298.6		11	3	17.2		3	3	4	1.269e-06	3.033e-06	6.788e-06
P30050	RL12	60S ribosomal protein L12 OS=Homo sapiens GN=RPL12 PE=1 SV=1	165	17843.6		11	2	15.2	Carbamidomethyl (C)	2	5	3	6.381e-07	1.686e-06	1.608e-06
P62424	RL7A	60S ribosomal protein L7a OS=Homo sapiens GN=RPL7A PE=1 SV=2	266	21585.4	tr|Q5T8U3|Q5T8U3_HUMAN;	11	6	31.4		2	6	3	3.058e-07	2.496e-06	1.186e-06
P30837	AL1B1	Aldehyde dehydrogenase X, mitochondrial OS=Homo sapiens GN=ALDH1B1 PE=1 SV=3	517	57314.3		11	4	11		4	3	3	2.729e-07	1.087e-06	9.784e-07
Q9BZZ5	API5	Apoptosis inhibitor 5 OS=Homo sapiens GN=API5 PE=1 SV=3	524	57669.2	tr|G3V1C3|G3V1C3_HUMAN;	11	5	17.1		4	5	2	5.853e-07	8.68e-07	3.683e-07
P24539	AT5F1	ATP synthase F(0) complex subunit B1, mitochondrial OS=Homo sapiens GN=ATP5F1 PE=1 SV=2	256	28962.4		11	5	21.5	Gln->pyro-Glu (N-term Q)	3	4	4	1.291e-06	1.895e-06	2.559e-06
Q9UII2	ATIF1	ATPase inhibitor, mitochondrial OS=Homo sapiens GN=ATPIF1 PE=1 SV=1	106	12259.3		11	3	11.3		5	1	2	4.109e-08	1.621e-08	2.696e-08
O94905	ERLN2	Erlin-2 OS=Homo sapiens GN=ERLIN2 PE=1 SV=1	339	37791.5	tr|E5RHW4|E5RHW4_HUMAN;	11	5	21.6		3.96	3.96	2.97	8.13e-07	8.981e-07	1.037e-06
P36776	LONM	Lon protease homolog, mitochondrial OS=Homo sapiens GN=LONP1 PE=1 SV=2	959	95372	tr|K7EJE8|K7EJE8_HUMAN;tr|K7EKE6|K7EKE6_HUMAN;	11	4	11.6	Oxidation (M)	3	3	4	2.498e-07	3.038e-07	3.836e-07
O43684	BUB3	Mitotic checkpoint protein BUB3 OS=Homo sapiens GN=BUB3 PE=1 SV=1	328	31755.7	tr|J3QT28|J3QT28_HUMAN;	11	4	18.3	Carbamidomethyl (C)	4	4	3	9.897e-07	8.594e-07	1.155e-06
P22234	PUR6	Multifunctional protein ADE2 OS=Homo sapiens GN=PAICS PE=1 SV=3	425	47175.2		11	8	23.8	Acetyl (Protein N-term),Carbamidomethyl (C)	1.98	3.99	4.98	1.942e-07	5.651e-07	8.173e-07
P62820	RAB1A	Ras-related protein Rab-1A OS=Homo sapiens GN=RAB1A PE=1 SV=3	205	22717.4		11	4	24.4		3.96	2.97	3.97	8.669e-07	2.964e-06	4.1e-06
P51148	RAB5C	Ras-related protein Rab-5C OS=Homo sapiens GN=RAB5C PE=1 SV=2	216	23521.8		11	4	22.7		2.97	3.98	3.98	1.611e-06	1.164e-06	1.275e-06
Q96PK6	RBM14	RNA-binding protein 14 OS=Homo sapiens GN=RBM14 PE=1 SV=2	669	69647		11	4	7.5	Oxidation (M)	4	3	4	5.404e-07	3.624e-07	6.666e-07
Q9UQE7	SMC3	Structural maintenance of chromosomes protein 3 OS=Homo sapiens GN=SMC3 PE=1 SV=2	1217	141814		11	5	6.2	Carbamidomethyl (C),Oxidation (M)	3	3	4	8.335e-08	9.095e-08	2.13e-07
P49755	TMEDA	Transmembrane emp24 domain-containing protein 10 OS=Homo sapiens GN=TMED10 PE=1 SV=2	219	25014.1		11	4	25.6	Oxidation (M)	3	5	3	6.334e-07	2.612e-06	1.149e-06
Q9Y5A9	YTHD2	YTH domain-containing family protein 2 OS=Homo sapiens GN=YTHDF2 PE=1 SV=2	579	62457.8		11	5	10.2	Acetyl (Protein N-term)	3	3.99	2	5.784e-07	3.251e-07	1.941e-07
P53396	ACLY	ATP-citrate synthase OS=Homo sapiens GN=ACLY PE=1 SV=3	1101	121086		10	7	10	Gln->pyro-Glu (N-term Q),Oxidation (M)	3	4	2	1.009e-07	2.834e-07	8.828e-08
O60506	HNRPQ	Heterogeneous nuclear ribonucleoprotein Q OS=Homo sapiens GN=SYNCRIP PE=1 SV=2	623	69739.7		10	5	10.1		0.99	4.99	2.98	5.758e-08	6.066e-07	4.511e-07
Q02978	M2OM	Mitochondrial 2-oxoglutarate/malate carrier protein OS=Homo sapiens GN=SLC25A11 PE=1 SV=3	314	32233.8	tr|I3L1P8|I3L1P8_HUMAN;	10	3	14.9	Acetyl (Protein N-term)	3	4	3	8.636e-07	1.333e-06	1.026e-06
P00387	NB5R3	NADH-cytochrome b5 reductase 3 OS=Homo sapiens GN=CYB5R3 PE=1 SV=3	301	16722	tr|B1AHF3|B1AHF3_HUMAN;	10	4	42.9		2	5	2	1.044e-06	2.446e-06	8.408e-07
P28331	NDUS1	NADH-ubiquinone oxidoreductase 75 kDa subunit, mitochondrial OS=Homo sapiens GN=NDUFS1 PE=1 SV=3	727	67059.1	tr|B4DJ81|B4DJ81_HUMAN;	10	5	13.9		2	3	3	1.669e-07	7.914e-08	2.848e-07
P19338	NUCL	Nucleolin OS=Homo sapiens GN=NCL PE=1 SV=3	710	32442.1	tr|H7BY16|H7BY16_HUMAN;	10	4	24.7		2	4	3	1.3e-07	4.535e-07	5.066e-07
Q9UHX1	PUF60	Poly(U)-binding-splicing factor PUF60 OS=Homo sapiens GN=PUF60 PE=1 SV=1	559	54736.1	tr|A0A0J9YVP6|A0A0J9YVP6_HUMAN;tr|A0A0J9YXJ8|A0A0J9YXJ8_HUMAN;tr|A0A0J9YXX5|A0A0J9YXX5_HUMAN;tr|A0A0J9YYL3|A0A0J9YYL3_HUMAN;	10	3	12.7	Oxidation (M)	1.99	3.96	3.97	1.234e-07	9.411e-07	1.054e-06
P27694	RFA1	Replication protein A 70 kDa DNA-binding subunit OS=Homo sapiens GN=RPA1 PE=1 SV=2	616	68275.4		10	5	11.5		2	5		1.897e-07	4.423e-07
Q9Y230	RUVB2	RuvB-like 2 OS=Homo sapiens GN=RUVBL2 PE=1 SV=3	463	51250.6		10	4	10.6		2	4.98	2	4.526e-07	1.309e-06	6.678e-07
Q96HS1	PGAM5	Serine/threonine-protein phosphatase PGAM5, mitochondrial OS=Homo sapiens GN=PGAM5 PE=1 SV=2	289	32056.6		10	4	15.6		4	3	1	1.162e-06	1.062e-06	3.636e-07
Q15738	NSDHL	Sterol-4-alpha-carboxylate 3-dehydrogenase, decarboxylating OS=Homo sapiens GN=NSDHL PE=1 SV=2	373	41981.6		10	3	13.9	Ammonia-loss (N-term C) + Carbamidomethyl (C)	3	3	4	3.814e-07	9.966e-07	1.88e-06
P43307	SSRA	Translocon-associated protein subunit alpha OS=Homo sapiens GN=SSR1 PE=1 SV=3	286	32946.7	tr|C9IZQ1|C9IZQ1_HUMAN;tr|C9J3L8|C9J3L8_HUMAN;tr|C9J5W0|C9J5W0_HUMAN;tr|E9PAL7|E9PAL7_HUMAN;	10	2	9.8		3	3	4	3.967e-07	1.166e-06	2.314e-06
Q9Y277	VDAC3	Voltage-dependent anion-selective channel protein 3 OS=Homo sapiens GN=VDAC3 PE=1 SV=1	283	30711.3		10	5	23	Carbamidomethyl (C)	3	2.99	3.99	9.626e-07	6.922e-07	1.866e-06
Q13200	PSMD2	26S proteasome non-ATPase regulatory subunit 2 OS=Homo sapiens GN=PSMD2 PE=1 SV=3	908	100406		9	5	8.9		3	3	3	4.616e-07	4.725e-07	4.133e-07
O43707	ACTN4	Alpha-actinin-4 OS=Homo sapiens GN=ACTN4 PE=1 SV=2	911	105059		9	10	13.5	Oxidation (M)		5.5	1.5		4.023e-07	1.053e-07
Q9UJS0	CMC2	Calcium-binding mitochondrial carrier protein Aralar2 OS=Homo sapiens GN=SLC25A13 PE=1 SV=2	675	74326.8		9	6	14.8			4	2		5.402e-07	2.897e-07
O43809	CPSF5	Cleavage and polyadenylation specificity factor subunit 5 OS=Homo sapiens GN=NUDT21 PE=1 SV=1	227	26264.8		9	2	20.7		2	3	2	1.369e-06	2.145e-06	1.941e-06
P08574	CY1	Cytochrome c1, heme protein, mitochondrial OS=Homo sapiens GN=CYC1 PE=1 SV=3	325	35489		9	3	11.7		1	2	3	6.943e-07	9.571e-07	1.162e-06
P52434	RPAB3	DNA-directed RNA polymerases I, II, and III subunit RPABC3 OS=Homo sapiens GN=POLR2H PE=1 SV=4	150	16950.4	tr|C9JLU1|C9JLU1_HUMAN;	9	3	21.6	Acetyl (Protein N-term)	4	3	2	8.379e-07	7.168e-07	6.568e-07
P52907	CAZA1	F-actin-capping protein subunit alpha-1 OS=Homo sapiens GN=CAPZA1 PE=1 SV=3	286	32974.4		9	2	9.8		3	4	2	1.597e-06	4.129e-06	1.528e-06
P63092	GNAS2	Guanine nucleotide-binding protein G(s) subunit alpha isoforms short OS=Homo sapiens GN=GNAS PE=1 SV=1	394	111262	sp|Q5JWF2|GNAS1_HUMAN;	9	7	30.7	Carbamidomethyl (C)	1.97	2.96	2.96	8.892e-07	1.182e-06	1.23e-06
P06899	H2B1J	Histone H2B type 1-J OS=Homo sapiens GN=HIST1H2BJ PE=1 SV=3	126	13935.6	sp|P23527|H2B1O_HUMAN;sp|P33778|H2B1B_HUMAN;sp|Q16778|H2B2E_HUMAN;sp|Q8N257|H2B3B_HUMAN;	9	5	44.4	Gln->pyro-Glu (N-term Q),Oxidation (M)		1.98	1.98		3.005e-06	7.146e-06
O75439	MPPB	Mitochondrial-processing peptidase subunit beta OS=Homo sapiens GN=PMPCB PE=1 SV=2	489	54475.6		9	6	18.4		1	2.99	3.99	1.216e-07	6.049e-07	4.603e-07
P35580	MYH10	Myosin-10 OS=Homo sapiens GN=MYH10 PE=1 SV=3	1976	229434		9	5	4.1	Oxidation (M)	6		1	1.102e-07		5.429e-08
Q06830	PRDX1	Peroxiredoxin-1 OS=Homo sapiens GN=PRDX1 PE=1 SV=1	199	18999.7	tr|A0A0A0MSI0|A0A0A0MSI0_HUMAN;	9	3	18.1	Gln->pyro-Glu (N-term Q)	3	3	3	2.437e-06	1.49e-06	1.839e-06
P28066	PSA5	Proteasome subunit alpha type-5 OS=Homo sapiens GN=PSMA5 PE=1 SV=3	241	26466.2		9	3	17.4	Oxidation (M)	3	3	3	5.522e-07	1.463e-06	2.293e-06
P13667	PDIA4	Protein disulfide-isomerase A4 OS=Homo sapiens GN=PDIA4 PE=1 SV=2	645	73067.1		9	6	11.2		2	6	1	3.682e-07	5.647e-07	2.332e-07
Q9GZL7	WDR12	Ribosome biogenesis protein WDR12 OS=Homo sapiens GN=WDR12 PE=1 SV=2	423	47803.8		9	2	10.4		4	3	2	2.837e-07	2.139e-07	4.063e-07
P36873	PP1G	Serine/threonine-protein phosphatase PP1-gamma catalytic subunit OS=Homo sapiens GN=PPP1CC PE=1 SV=1	323	37049.8		9	4	18	Acetyl (Protein N-term)	3.98	2.96	1.97	3.714e-07	5.141e-07	5.723e-07
P08621	RU17	U1 small nuclear ribonucleoprotein 70 kDa OS=Homo sapiens GN=SNRNP70 PE=1 SV=2	437	51651.9		9	4	10.5	Acetyl (Protein N-term)	4	2	2	3.11e-07	5.936e-07	6.096e-07
P62195	PRS8	26S proteasome regulatory subunit 8 OS=Homo sapiens GN=PSMC5 PE=1 SV=1	406	29400.5	tr|J3QQM1|J3QQM1_HUMAN;	8	2	9.5		3	3	2	2.773e-07	1.529e-07	3.361e-07
P62841	RS15	40S ribosomal protein S15 OS=Homo sapiens GN=RPS15 PE=1 SV=2	145	16595.9	tr|K7ELC2|K7ELC2_HUMAN;tr|K7EQJ5|K7EQJ5_HUMAN;	8	2	24.8	Oxidation (M)	1.98	1.98	3.96	3.781e-07	1.959e-07	1.061e-06
P00918	CAH2	Carbonic anhydrase 2 OS=Homo sapiens GN=CA2 PE=1 SV=2	260	29300		8	3	16.9		1	3	2	3.616e-07	1.243e-06	9.514e-07
O75131	CPNE3	Copine-3 OS=Homo sapiens GN=CPNE3 PE=1 SV=1	537	60236.2		8	5	12.3	Carbamidomethyl (C)	2	3	3	4.375e-07	9.362e-07	1.208e-06
P00403	COX2	Cytochrome c oxidase subunit 2 OS=Homo sapiens GN=MT-CO2 PE=1 SV=1	227	25602.2		8	3	20.3	Oxidation (M)	2	3	3	1.212e-06	4.39e-06	1.678e-06
P13073	COX41	Cytochrome c oxidase subunit 4 isoform 1, mitochondrial OS=Homo sapiens GN=COX4I1 PE=1 SV=1	169	19600.1		8	3	13		3	3	2	3.923e-06	3.618e-06	5.341e-06
P10515	ODP2	Dihydrolipoyllysine-residue acetyltransferase component of pyruvate dehydrogenase complex, mitochondrial OS=Homo sapiens GN=DLAT PE=1 SV=3	647	51295.2	tr|E9PEJ4|E9PEJ4_HUMAN;tr|H0YDD4|H0YDD4_HUMAN;	8	3	8.8	Oxidation (M)	2	5	1	1.466e-07	9.612e-07	1.93e-07
O00303	EIF3F	Eukaryotic translation initiation factor 3 subunit F OS=Homo sapiens GN=EIF3F PE=1 SV=1	357	10818.7	tr|H0YDT6|H0YDT6_HUMAN;	8	2	36		3	3	2	1.039e-06	1.089e-06	6.976e-07
Q86YZ3	HORN	Hornerin OS=Homo sapiens GN=HRNR PE=1 SV=2	2850	283074		8	4	8.1		4	2	2	4.648e-08	2.995e-08	5.023e-08
O00410	IPO5	Importin-5 OS=Homo sapiens GN=IPO5 PE=1 SV=4	1097	123874		8	3	4.9	Acetyl (Protein N-term)	3	3	2	1.469e-07	1.41e-07	1.923e-07
O94826	TOM70	Mitochondrial import receptor subunit TOM70 OS=Homo sapiens GN=TOMM70 PE=1 SV=1	608	67592.1		8	4	7.6		4	2	2	3.565e-07	3.849e-07	2.981e-07
P12004	PCNA	Proliferating cell nuclear antigen OS=Homo sapiens GN=PCNA PE=1 SV=1	261	28822.3		8	3	10.7	Oxidation (M)	2	3	2	1.104e-06	2.467e-06	1.42e-06
P28070	PSB4	Proteasome subunit beta type-4 OS=Homo sapiens GN=PSMB4 PE=1 SV=4	264	29257.5		8	3	12.9		2	3	1	1.046e-06	1.975e-06	7.103e-07
P61224	RAP1B	Ras-related protein Rap-1b OS=Homo sapiens GN=RAP1B PE=1 SV=1	184	21027.7	sp|P62834|RAP1A_HUMAN;	8	2	12.5		1.98	2.97	0.99	1.034e-06	3.397e-06	1.708e-06
Q9NQC3	RTN4	Reticulon-4 OS=Homo sapiens GN=RTN4 PE=1 SV=2	1192	37211.4	tr|F8W914|F8W914_HUMAN;	8	2	7.8		2	4	2	2.125e-07	4.434e-07	2.68e-07
Q13501	SQSTM	Sequestosome-1 OS=Homo sapiens GN=SQSTM1 PE=1 SV=1	440	41095	tr|E7EMC7|E7EMC7_HUMAN;	8	3	13.8	Carbamidomethyl (C)	1.99	3	2	1.751e-07	6.073e-07	4.146e-07
P54709	AT1B3	Sodium/potassium-transporting ATPase subunit beta-3 OS=Homo sapiens GN=ATP1B3 PE=1 SV=1	279	31564.1		8	3	12.5		2.97	0.99	3.96	1.741e-06	5.443e-07	1.404e-06
P46459	NSF	Vesicle-fusing ATPase OS=Homo sapiens GN=NSF PE=1 SV=3	744	82256	tr|I3L0N3|I3L0N3_HUMAN;	8	4	6.9		2	3	3	1.774e-07	4.976e-07	3.792e-07
P62269	RS18	40S ribosomal protein S18 OS=Homo sapiens GN=RPS18 PE=1 SV=3	152	17743.9		7	5	28.9	Oxidation (M)	1	2	4	4.469e-07	6.951e-07	2.321e-06
P23526	SAHH	Adenosylhomocysteinase OS=Homo sapiens GN=AHCY PE=1 SV=4	432	47811.3		7	4	11.8		3	4		3.439e-07	9.021e-07
P48047	ATPO	ATP synthase subunit O, mitochondrial OS=Homo sapiens GN=ATP5O PE=1 SV=1	213	23316.7		7	4	22.1		2	3	2	5.835e-07	9.938e-07	1.58e-06
P51572	BAP31	B-cell receptor-associated protein 31 OS=Homo sapiens GN=BCAP31 PE=1 SV=3	246	28046.1		7	3	13.8	Oxidation (M)	1.99	1.99	0.99	4.754e-07	1.443e-06	3.997e-07
Q99459	CDC5L	Cell division cycle 5-like protein OS=Homo sapiens GN=CDC5L PE=1 SV=2	802	92427.8		7	4	8.4		1	3	3	1.043e-07	3.547e-07	4.406e-07
Q13011	ECH1	Delta(3,5)-Delta(2,4)-dienoyl-CoA isomerase, mitochondrial OS=Homo sapiens GN=ECH1 PE=1 SV=2	328	35883.4		7	3	16.8		1.98	2.99	1.99	4.115e-07	1.15e-06	6.712e-07
P14314	GLU2B	Glucosidase 2 subunit beta OS=Homo sapiens GN=PRKCSH PE=1 SV=2	528	60298.3	tr|K7ELL7|K7ELL7_HUMAN;	7	4	8.1	Oxidation (M)		5	2		5.517e-07	8.822e-08
P62879	GBB2	Guanine nucleotide-binding protein G(I)/G(S)/G(T) subunit beta-2 OS=Homo sapiens GN=GNB2 PE=1 SV=3	340	17057.6	sp|Q9HAV0|GBB4_HUMAN;tr|C9JIS1|C9JIS1_HUMAN;tr|C9JXA5|C9JXA5_HUMAN;tr|C9JZN1|C9JZN1_HUMAN;	7	2	16.4	Acetyl (Protein N-term)		1.98	1.98		6.096e-07	5.494e-07
Q9BXW7	HDHD5	Haloacid dehalogenase-like hydrolase domain-containing 5 OS=Homo sapiens GN=HDHD5 PE=1 SV=1	423	46417.9		7	2	7.6		1	3	2	6.6e-07	1.448e-06	8.14e-07
P10412	H14	Histone H1.4 OS=Homo sapiens GN=HIST1H1E PE=1 SV=2	219	21405.8	sp|P16402|H13_HUMAN;sp|P16403|H12_HUMAN;	7	3	10.8		1	3	3	3.225e-07	1.085e-06	1.084e-06
O00629	IMA3	Importin subunit alpha-3 OS=Homo sapiens GN=KPNA4 PE=1 SV=1	521	57994.7		7	3	13.8		2	1	4	1.681e-07	5.466e-08	4.121e-07
Q9Y5V3	MAGD1	Melanoma-associated antigen D1 OS=Homo sapiens GN=MAGED1 PE=1 SV=3	778	86323.4		7	2	5.4	Oxidation (M)	3	2	2	8.642e-08	5.671e-08	7.538e-08
O43615	TIM44	Mitochondrial import inner membrane translocase subunit TIM44 OS=Homo sapiens GN=TIMM44 PE=1 SV=2	452	31213.3	tr|M0QXU7|M0QXU7_HUMAN;	7	4	20.9		1	2	1	1.836e-07	2.554e-07	1.329e-07
P05204	HMGN2	Non-histone chromosomal protein HMG-17 OS=Homo sapiens GN=HMGN2 PE=1 SV=3	90	9405.07		7	2	37.8		2	3	2	3.078e-06	5.655e-06	3.671e-06
Q13162	PRDX4	Peroxiredoxin-4 OS=Homo sapiens GN=PRDX4 PE=1 SV=1	271	18352.4	tr|H7C3T4|H7C3T4_HUMAN;	7	2	14.9		3	4		1.199e-06	3.047e-06
P30041	PRDX6	Peroxiredoxin-6 OS=Homo sapiens GN=PRDX6 PE=1 SV=3	224	25073.2		7	3	21.9		2	4	1	9.013e-07	1.588e-06	8.914e-07
Q8IWS0	PHF6	PHD finger protein 6 OS=Homo sapiens GN=PHF6 PE=1 SV=1	365	41443.1	tr|A0A0D9SGE8|A0A0D9SGE8_HUMAN;	7	2	9.3	Oxidation (M)	1	3	3	5.87e-08	1.131e-07	2.204e-07
P00558	PGK1	Phosphoglycerate kinase 1 OS=Homo sapiens GN=PGK1 PE=1 SV=3	417	44694.2		7	4	12.7		1	3	3	4.256e-07	1.29e-06	1.289e-06
Q9UQ80	PA2G4	Proliferation-associated protein 2G4 OS=Homo sapiens GN=PA2G4 PE=1 SV=3	394	43867.2		7	4	15		1	3.99	2	1.195e-07	4.906e-07	3.575e-07
P35241	RADI	Radixin OS=Homo sapiens GN=RDX PE=1 SV=1	583	68683.5		7	4	7.2	Oxidation (M)	1	3	2	7.795e-08	3.751e-07	3.235e-07
P62491	RB11A	Ras-related protein Rab-11A OS=Homo sapiens GN=RAB11A PE=1 SV=3	216	22526.5	sp|Q15907|RB11B_HUMAN;tr|H3BMH2|H3BMH2_HUMAN;tr|H3BSC1|H3BSC1_HUMAN;	7	5	35.5	Acetyl (Protein N-term)		5	2		2.211e-06	1.58e-06
P49756	RBM25	RNA-binding protein 25 OS=Homo sapiens GN=RBM25 PE=1 SV=3	843	100377		7	6	13.3	Oxidation (M)	3	1	2	4.527e-07	1.951e-07	1.972e-07
P16615	AT2A2	Sarcoplasmic/endoplasmic reticulum calcium ATPase 2 OS=Homo sapiens GN=ATP2A2 PE=1 SV=1	1042	114989		7	5	6.9	Oxidation (M)	2	2.99		9.579e-08	2.069e-07
P62851	RS25	40S ribosomal protein S25 OS=Homo sapiens GN=RPS25 PE=1 SV=1	125	13769.7		6	2	15.2		2	1	3	2.876e-06	9.105e-07	4.23e-06
Q07020	RL18	60S ribosomal protein L18 OS=Homo sapiens GN=RPL18 PE=1 SV=2	188	21882.3	tr|F8VUA6|F8VUA6_HUMAN;tr|H0YHA7|H0YHA7_HUMAN;tr|J3QQ67|J3QQ67_HUMAN;	6	2	20.8		2.97		2.97	2.651e-07		5.287e-07
Q96A33	CCD47	Coiled-coil domain-containing protein 47 OS=Homo sapiens GN=CCDC47 PE=1 SV=1	483	22641.7	tr|A0A087WYW6|A0A087WYW6_HUMAN;	6	3	18.9	Oxidation (M)	1	2	2	1.229e-07	3.509e-07	3.068e-07
P06744	G6PI	Glucose-6-phosphate isomerase OS=Homo sapiens GN=GPI PE=1 SV=4	558	53494.3	tr|A0A0A0MTS2|A0A0A0MTS2_HUMAN;tr|K7EQ48|K7EQ48_HUMAN;	6	4	11.4			3.98	2		5.446e-07	4.763e-07
D6R9P3	D6R9P3	Heterogeneous nuclear ribonucleoprotein A/B OS=Homo sapiens GN=HNRNPAB PE=1 SV=1	280	30527.1	tr|D6RBZ0|D6RBZ0_HUMAN;tr|D6RD18|D6RD18_HUMAN;	6	2	9.6		2	2	2	1.324e-06	8.231e-07	1.605e-06
O95573	ACSL3	Long-chain-fatty-acid--CoA ligase 3 OS=Homo sapiens GN=ACSL3 PE=1 SV=3	720	80566.4		6	3	4.9	Acetyl (Protein N-term),Oxidation (M)	1.98	1.99		4.723e-08	4.227e-08
P11310	ACADM	Medium-chain specific acyl-CoA dehydrogenase, mitochondrial OS=Homo sapiens GN=ACADM PE=1 SV=1	421	50364.5	tr|B7Z9I1|B7Z9I1_HUMAN;tr|Q5T4U5|Q5T4U5_HUMAN;	6	4	12.7			1.98	1.98		3.577e-07	6.536e-07
O15173	PGRC2	Membrane-associated progesterone receptor component 2 OS=Homo sapiens GN=PGRMC2 PE=1 SV=1	223	23857.8		6	2	12.1			3	3		1.027e-06	1.254e-06
P05114	HMGN1	Non-histone chromosomal protein HMG-14 OS=Homo sapiens GN=HMGN1 PE=1 SV=3	100	5163	tr|F2Z2W6|F2Z2W6_HUMAN;tr|F2Z2Y5|F2Z2Y5_HUMAN;tr|H7BXJ5|H7BXJ5_HUMAN;	6	2	31.8		3	1	1	2.543e-07	1.897e-07	2.757e-07
Q14980	NUMA1	Nuclear mitotic apparatus protein 1 OS=Homo sapiens GN=NUMA1 PE=1 SV=2	2115	236631	tr|A0A087WY61|A0A087WY61_HUMAN;	6	7	4.9	Oxidation (M)	2.99		2	2.316e-08		7.113e-08
Q9Y2X3	NOP58	Nucleolar protein 58 OS=Homo sapiens GN=NOP58 PE=1 SV=1	529	59684.6		6	3	7.6		2	2	1	5.553e-07	2.649e-07	3.242e-07
P32119	PRDX2	Peroxiredoxin-2 OS=Homo sapiens GN=PRDX2 PE=1 SV=5	198	21932.3		6	2	14.6	Gln->pyro-Glu (N-term Q)	1	3	2	3.708e-07	2.38e-06	1.674e-06
Q8TCS8	PNPT1	Polyribonucleotide nucleotidyltransferase 1, mitochondrial OS=Homo sapiens GN=PNPT1 PE=1 SV=2	783	86130.8		6	4	6.6	Oxidation (M)	1	3	2	5.083e-08	4.454e-07	2.058e-07
P20618	PSB1	Proteasome subunit beta type-1 OS=Homo sapiens GN=PSMB1 PE=1 SV=2	241	26544.4		6	3	16.2		2	1	2	1.718e-06	4.019e-07	9.01e-07
P49721	PSB2	Proteasome subunit beta type-2 OS=Homo sapiens GN=PSMB2 PE=1 SV=1	201	9569.09	tr|A0A087WVV1|A0A087WVV1_HUMAN;	6	2	35.7		3	2	1	7.32e-07	2.173e-06	2.942e-06
P50395	GDIB	Rab GDP dissociation inhibitor beta OS=Homo sapiens GN=GDI2 PE=1 SV=2	445	50756.9		6	3	7		2	2	1	1.176e-07	2.858e-07	1.511e-07
P46060	RAGP1	Ran GTPase-activating protein 1 OS=Homo sapiens GN=RANGAP1 PE=1 SV=1	587	63664.4		6	5	15	Carbamidomethyl (C)	1	2	3	8.854e-08	3.138e-07	1.727e-07
Q99832	TCPH	T-complex protein 1 subunit eta OS=Homo sapiens GN=CCT7 PE=1 SV=2	543	10505.8	tr|F8WAM2|F8WAM2_HUMAN;	6	3	44.9			2	2		1.179e-07	2.435e-07
P22102	PUR2	Trifunctional purine biosynthetic protein adenosine-3 OS=Homo sapiens GN=GART PE=1 SV=1	1010	107987		6	2	3.4			2	1		1.03e-07	9.771e-08
Q13885	TBB2A	Tubulin beta-2A chain OS=Homo sapiens GN=TUBB2A PE=1 SV=1	445	50047	sp|Q9BVA1|TBB2B_HUMAN;	6	20	53.3	Carbamidomethyl (C),Oxidation (M)	2	1	1	2.522e-07	2.995e-07	1.529e-07
P54577	SYYC	Tyrosine--tRNA ligase, cytoplasmic OS=Homo sapiens GN=YARS PE=1 SV=4	528	43985.1	tr|A0A0C4DGZ5|A0A0C4DGZ5_HUMAN;	6	2	9.3		1	3	1	8.511e-08	3.505e-07	1.937e-07
Q96DI7	SNR40	U5 small nuclear ribonucleoprotein 40 kDa protein OS=Homo sapiens GN=SNRNP40 PE=1 SV=1	357	39375.8		6	3	18.5		3	2	1	5.132e-07	4.101e-07	2.951e-07
Q9P0L0	VAPA	Vesicle-associated membrane protein-associated protein A OS=Homo sapiens GN=VAPA PE=1 SV=3	249	27947.3		6	4	15.3		1.5	2		2.566e-07	8.835e-07
Q9UJ83	HACL1	2-hydroxyacyl-CoA lyase 1 OS=Homo sapiens GN=HACL1 PE=1 SV=2	578	37688	tr|B3KPX4|B3KPX4_HUMAN;	5	2	11.9		1	3	1	5.46e-08	9.403e-08	5.6e-08
Q15125	EBP	3-beta-hydroxysteroid-Delta(8),Delta(7)-isomerase OS=Homo sapiens GN=EBP PE=1 SV=3	230	26389.8		5	2	12.2	Acetyl (Protein N-term)	2			2.787e-07
P62244	RS15A	40S ribosomal protein S15a OS=Homo sapiens GN=RPS15A PE=1 SV=2	130	11488.2	tr|I3L3P7|I3L3P7_HUMAN;	5	2	17		0.99	0.99	1.98	7.362e-07	6.07e-07	2.561e-06
P15880	RS2	40S ribosomal protein S2 OS=Homo sapiens GN=RPS2 PE=1 SV=2	293	21194.4	tr|E9PQD7|E9PQD7_HUMAN;tr|H0YEN5|H0YEN5_HUMAN;	5	2	11.8			3	1		1.407e-06	1.751e-06
P61247	RS3A	40S ribosomal protein S3a OS=Homo sapiens GN=RPS3A PE=1 SV=2	264	23567.6	tr|D6R9B6|D6R9B6_HUMAN;tr|D6RAT0|D6RAT0_HUMAN;tr|D6RG13|D6RG13_HUMAN;tr|H0Y9Y4|H0Y9Y4_HUMAN;	5	3	25.5	Carbamidomethyl (C),Oxidation (M)	1	3	1	8.926e-08	1.049e-06	2.361e-07
P35268	RL22	60S ribosomal protein L22 OS=Homo sapiens GN=RPL22 PE=1 SV=2	128	11179.7	tr|K7EJT5|K7EJT5_HUMAN;tr|K7EKS7|K7EKS7_HUMAN;tr|K7ELC4|K7ELC4_HUMAN;tr|K7EMH1|K7EMH1_HUMAN;tr|K7EP65|K7EP65_HUMAN;tr|K7ERI7|K7ERI7_HUMAN;	5	2	51.1			3	2		1.935e-06	4.325e-06
P62917	RL8	60S ribosomal protein L8 OS=Homo sapiens GN=RPL8 PE=1 SV=2	257	16206	tr|E9PKU4|E9PKU4_HUMAN;tr|E9PP36|E9PP36_HUMAN;	5	2	12.8		1	2	2	3.682e-07	6.661e-07	1.255e-06
P11021	GRP78	78 kDa glucose-regulated protein OS=Homo sapiens GN=HSPA5 PE=1 SV=2	654	72468.5		5	5	11.2		4		1	5.579e-07		7.643e-08
O00767	ACOD	Acyl-CoA desaturase OS=Homo sapiens GN=SCD PE=1 SV=2	359	41586.2		5	3	7.2		1	3	1	1.702e-07	3.558e-07	1.887e-07
O43823	AKAP8	A-kinase anchor protein 8 OS=Homo sapiens GN=AKAP8 PE=1 SV=1	692	76259.2		5	2	3.8	Gln->pyro-Glu (N-term Q)		3	2		2.123e-08	4.521e-09
P20073	ANXA7	Annexin A7 OS=Homo sapiens GN=ANXA7 PE=1 SV=3	488	52849.8		5	2	4.1		1		3	1.612e-07		4.328e-07
Q9UKV3	ACINU	Apoptotic chromatin condensation inducer in the nucleus OS=Homo sapiens GN=ACIN1 PE=1 SV=2	1341	145734	tr|E7EQT4|E7EQT4_HUMAN;tr|S4R3H4|S4R3H4_HUMAN;	5	2	2.2	Oxidation (M)	1.99	1.98	0.99	1.612e-08	2.12e-08	2.459e-08
P35222	CTNB1	Catenin beta-1 OS=Homo sapiens GN=CTNNB1 PE=1 SV=1	781	84928	tr|B4DGU4|B4DGU4_HUMAN;	5	3	5.6	Oxidation (M)	3	1		2.047e-07	5.354e-08
O75367	H2AY	Core histone macro-H2A.1 OS=Homo sapiens GN=H2AFY PE=1 SV=4	372	39700.5		5	3	10.8		1	2	2	1.488e-07	9.574e-07	6.399e-07
P49736	MCM2	DNA replication licensing factor MCM2 OS=Homo sapiens GN=MCM2 PE=1 SV=4	904	94286.9	tr|H0Y8E6|H0Y8E6_HUMAN;	5	3	5.6		2	1	2	2.2e-07	1.279e-07	3.769e-07
P33991	MCM4	DNA replication licensing factor MCM4 OS=Homo sapiens GN=MCM4 PE=1 SV=5	863	31685.6	tr|E5RG31|E5RG31_HUMAN;	5	2	7.2		1	1	2	1.39e-07	1.187e-07	2.288e-07
O60884	DNJA2	DnaJ homolog subfamily A member 2 OS=Homo sapiens GN=DNAJA2 PE=1 SV=1	412	45824.7		5	2	19.4			2	1		4.068e-07	2.158e-07
P49792	RBP2	E3 SUMO-protein ligase RanBP2 OS=Homo sapiens GN=RANBP2 PE=1 SV=2	3224	358929		5	3	1.5	Carbamidomethyl (C)	1.98	1		8.089e-08	5.101e-08
P50402	EMD	Emerin OS=Homo sapiens GN=EMD PE=1 SV=1	254	24976.9	tr|Q5HY57|Q5HY57_HUMAN;	5	2	10		1	2	2	3.31e-07	7.226e-07	2.828e-07
Q13347	EIF3I	Eukaryotic translation initiation factor 3 subunit I OS=Homo sapiens GN=EIF3I PE=1 SV=1	325	36568.7		5	2	7.1	Oxidation (M)	2	2	1	4.767e-07	4.272e-07	3.63e-07
P42167	LAP2B	Lamina-associated polypeptide 2, isoforms beta/gamma OS=Homo sapiens GN=TMPO PE=1 SV=2	454	50765.5		5	10	30.4	Gln->pyro-Glu (N-term Q)		2.99	2		2.665e-07	2.543e-07
O75306	NDUS2	NADH dehydrogenase [ubiquinone] iron-sulfur protein 2, mitochondrial OS=Homo sapiens GN=NDUFS2 PE=1 SV=2	463	52637.8		5	4	8	Carbamidomethyl (C)	1	1	3	1.975e-07	4.099e-07	8.097e-07
Q6P2Q9	PRP8	Pre-mRNA-processing-splicing factor 8 OS=Homo sapiens GN=PRPF8 PE=1 SV=2	2335	274111		5	4	2.9	Oxidation (M)	1	3		1.181e-08	3.067e-08
P28074	PSB5	Proteasome subunit beta type-5 OS=Homo sapiens GN=PSMB5 PE=1 SV=3	263	28534.3		5	3	7.2		2	1	2	3.762e-07	1.516e-07	3.698e-07
P28072	PSB6	Proteasome subunit beta type-6 OS=Homo sapiens GN=PSMB6 PE=1 SV=4	239	10697.3	tr|A0A087X2I4|A0A087X2I4_HUMAN;tr|I3L3X7|I3L3X7_HUMAN;	5	2	20.6		3	1	1	4.889e-07	1.067e-07	2.399e-07
P61019	RAB2A	Ras-related protein Rab-2A OS=Homo sapiens GN=RAB2A PE=1 SV=1	212	23584.8		5	2	12.7		1	2	2	2.757e-07	7.311e-07	9.673e-07
Q14137	BOP1	Ribosome biogenesis protein BOP1 OS=Homo sapiens GN=BOP1 PE=1 SV=2	746	83793.4		5	2	5		2	2	1	1.627e-07	2.456e-07	1.762e-07
Q14498	RBM39	RNA-binding protein 39 OS=Homo sapiens GN=RBM39 PE=1 SV=2	530	27118.7	tr|A0A0U1RQH7|A0A0U1RQH7_HUMAN;tr|G3XAC6|G3XAC6_HUMAN;tr|H0Y4X3|H0Y4X3_HUMAN;tr|Q5QP23|Q5QP23_HUMAN;	5	3	15.6	Carbamidomethyl (C),Oxidation (M)	2	2	1	1.937e-07	3.008e-07	1.965e-07
P14678	RSMB	Small nuclear ribonucleoprotein-associated proteins B and B' OS=Homo sapiens GN=SNRPB PE=1 SV=2	240	17571.3	sp|P63162|RSMN_HUMAN;tr|J3QLE5|J3QLE5_HUMAN;	5	3	21.3	Oxidation (M)	1	2		9.086e-07	1.592e-06
P0DN76	U2AF5	Splicing factor U2AF 35 kDa subunit-like protein OS=Homo sapiens GN=U2AF1L5 PE=1 SV=1	240	27908.5	sp|Q01081|U2AF1_HUMAN;	5	2	11.2	Acetyl (Protein N-term)		2	2		3.201e-07	4.379e-07
Q5JTV8	TOIP1	Torsin-1A-interacting protein 1 OS=Homo sapiens GN=TOR1AIP1 PE=1 SV=2	583	67943.1	tr|A0A0A0MSK5|A0A0A0MSK5_HUMAN;tr|J3KN66|J3KN66_HUMAN;	5	2	5.4		1.98	1.98	0.99	1.098e-07	1.844e-07	6.166e-08
P51571	SSRD	Translocon-associated protein subunit delta OS=Homo sapiens GN=SSR4 PE=1 SV=1	173	19022.6		5	2	18.5		2	2	1	8.075e-07	5.99e-07	1.852e-06
P53007	TXTP	Tricarboxylate transport protein, mitochondrial OS=Homo sapiens GN=SLC25A1 PE=1 SV=2	311	23249.2	tr|B4DP62|B4DP62_HUMAN;	5	2	22.6	Oxidation (M)	2	1	2	1.583e-07	1.546e-07	1.629e-07
Q13509	TBB3	Tubulin beta-3 chain OS=Homo sapiens GN=TUBB3 PE=1 SV=2	450	50526.3		5	14	33.6	Carbamidomethyl (C),Oxidation (M)	3		2	3.002e-07		4.293e-07
O00231	PSD11	26S proteasome non-ATPase regulatory subunit 11 OS=Homo sapiens GN=PSMD11 PE=1 SV=3	422	47560.1		4	4	11.1		3	1		9.436e-07	1.23e-07
P35998	PRS7	26S proteasome regulatory subunit 7 OS=Homo sapiens GN=PSMC2 PE=1 SV=3	433	44940.3	tr|A0A1W2PQS1|A0A1W2PQS1_HUMAN;	4	4	12	Carbamidomethyl (C)	2	1		4.129e-07	2.939e-07
P62277	RS13	40S ribosomal protein S13 OS=Homo sapiens GN=RPS13 PE=1 SV=2	151	16758.3	tr|J3KMX5|J3KMX5_HUMAN;	4	2	18.2			1	2		7.345e-07	1.751e-06
P60866	RS20	40S ribosomal protein S20 OS=Homo sapiens GN=RPS20 PE=1 SV=1	119	13382.3		4	2	19.3		1	1	2	5.574e-07	1.619e-06	2.77e-06
Q9H0D6	XRN2	5'-3' exoribonuclease 2 OS=Homo sapiens GN=XRN2 PE=1 SV=1	950	108783		4	2	2.8	Oxidation (M)	1		1	5.933e-09		2.218e-08
P62910	RL32	60S ribosomal protein L32 OS=Homo sapiens GN=RPL32 PE=1 SV=2	135	17986.8	tr|D3YTB1|D3YTB1_HUMAN;tr|F8W727|F8W727_HUMAN;	4	2	12.8		0.99	0.99	1.99	8.609e-07	8.681e-07	1.953e-06
Q9HDC9	APMAP	Adipocyte plasma membrane-associated protein OS=Homo sapiens GN=APMAP PE=1 SV=2	416	45487.2	tr|H0Y512|H0Y512_HUMAN;	4	2	9.5		1	3		3.65e-07	6.804e-07
P53618	COPB	Coatomer subunit beta OS=Homo sapiens GN=COPB1 PE=1 SV=3	953	55547.4	tr|E9PP73|E9PP73_HUMAN;	4	2	5.2	Oxidation (M)	1	2	1	2.209e-08	1.2e-07	1.164e-07
Q92879	CELF1	CUGBP Elav-like family member 1 OS=Homo sapiens GN=CELF1 PE=1 SV=2	486	55251.4	tr|G5EA30|G5EA30_HUMAN;	4	2	10.3	Oxidation (M)	0.99	1.99		8.745e-08	2.446e-07
O43402	EMC8	ER membrane protein complex subunit 8 OS=Homo sapiens GN=EMC8 PE=1 SV=1	210	23811.7		4	2	10			2	2		6.569e-07	1.025e-06
P05198	IF2A	Eukaryotic translation initiation factor 2 subunit 1 OS=Homo sapiens GN=EIF2S1 PE=1 SV=3	315	29032.3	tr|G3V4T5|G3V4T5_HUMAN;tr|H0YJS4|H0YJS4_HUMAN;	4	2	7.1			2	2		3.059e-07	4.731e-07
P41091	IF2G	Eukaryotic translation initiation factor 2 subunit 3 OS=Homo sapiens GN=EIF2S3 PE=1 SV=3	472	51203.3		4	3	11.7	Acetyl (Protein N-term)	2			8.57e-07
B5ME19	EIFCL	Eukaryotic translation initiation factor 3 subunit C-like protein OS=Homo sapiens GN=EIF3CL PE=3 SV=1	914	105548	sp|Q99613|EIF3C_HUMAN;	4	2	3.9		2	1	1	7.548e-08	6.425e-08	3.161e-08
P60228	EIF3E	Eukaryotic translation initiation factor 3 subunit E OS=Homo sapiens GN=EIF3E PE=1 SV=1	445	41420.8	tr|E5RGA2|E5RGA2_HUMAN;	4	2	8			0.99	1.99		2.23e-07	7.469e-07
P47756	CAPZB	F-actin-capping protein subunit beta OS=Homo sapiens GN=CAPZB PE=1 SV=4	277	33850	tr|B1AK85|B1AK85_HUMAN;tr|B1AK87|B1AK87_HUMAN;tr|B1AK88|B1AK88_HUMAN;	4	3	22.7	Carbamidomethyl (C)	1	1	2	9.675e-08	6.304e-07	1.297e-06
Q1KMD3	HNRL2	Heterogeneous nuclear ribonucleoprotein U-like protein 2 OS=Homo sapiens GN=HNRNPUL2 PE=1 SV=1	747	84855.3	tr|H3BQZ7|H3BQZ7_HUMAN;	4	2	2.1		1	2	1	7.581e-08	2.204e-07	8.306e-08
P46379	BAG6	Large proline-rich protein BAG6 OS=Homo sapiens GN=BAG6 PE=1 SV=2	1132	113701	tr|A0A024RCR6|A0A024RCR6_HUMAN;tr|A0A0G2JK23|A0A0G2JK23_HUMAN;tr|A0A0G2JL47|A0A0G2JL47_HUMAN;	4	4	5.6	Oxidation (M)			4			2.411e-07
Q10713	MPPA	Mitochondrial-processing peptidase subunit alpha OS=Homo sapiens GN=PMPCA PE=1 SV=2	525	58359.7		4	2	8.4		1	3		6.752e-08	4.374e-07
P78406	RAE1L	mRNA export factor OS=Homo sapiens GN=RAE1 PE=1 SV=1	368	41049.9		4	4	9.8		1	0.99		4.382e-08	5.803e-07
Q12769	NU160	Nuclear pore complex protein Nup160 OS=Homo sapiens GN=NUP160 PE=1 SV=3	1436	149256	tr|E9PR16|E9PR16_HUMAN;tr|G3V198|G3V198_HUMAN;	4	2	3.8		3		1	5.685e-08		5.583e-08
Q9BVI4	NOC4L	Nucleolar complex protein 4 homolog OS=Homo sapiens GN=NOC4L PE=1 SV=1	516	58574.8		4	2	10.3			2	2		1.851e-07	3.586e-07
Q9Y285	SYFA	Phenylalanine--tRNA ligase alpha subunit OS=Homo sapiens GN=FARSA PE=1 SV=3	508	26074.5	tr|K7EK06|K7EK06_HUMAN;tr|K7ER16|K7ER16_HUMAN;	4	2	14.9	Acetyl (Protein N-term)	1.99	1.99		7.665e-08	4.187e-07
P15259	PGAM2	Phosphoglycerate mutase 2 OS=Homo sapiens GN=PGAM2 PE=1 SV=3	253	28857.9	sp|P18669|PGAM1_HUMAN;	4	2	9.9		0.99	1.99		1.424e-07	1.362e-06
Q9BY77	PDIP3	Polymerase delta-interacting protein 3 OS=Homo sapiens GN=POLDIP3 PE=1 SV=2	421	24878.5	tr|F6VRR5|F6VRR5_HUMAN;tr|F8WCX5|F8WCX5_HUMAN;tr|F8WEE2|F8WEE2_HUMAN;tr|Q6R954|Q6R954_HUMAN;tr|Q8WUT1|Q8WUT1_HUMAN;	4	3	23.2			1	2		1.453e-07	3.038e-07
P25788	PSA3	Proteasome subunit alpha type-3 OS=Homo sapiens GN=PSMA3 PE=1 SV=2	255	28487.1		4	2	8.6		2	1	1	9.018e-07	2.402e-07	4.952e-07
P07237	PDIA1	Protein disulfide-isomerase OS=Homo sapiens GN=P4HB PE=1 SV=3	508	57224.8		4	3	14.8	Gln->pyro-Glu (N-term Q)	1.98	1.98		2.63e-07	3.094e-07
Q9NQ29	LUC7L	Putative RNA-binding protein Luc7-like 1 OS=Homo sapiens GN=LUC7L PE=1 SV=1	371	21413.1	sp|Q9Y383|LC7L2_HUMAN;tr|A0A0A6YYJ8|A0A0A6YYJ8_HUMAN;tr|A8MYV2|A8MYV2_HUMAN;tr|B8ZZ10|B8ZZ10_HUMAN;	4	2	12.1		1	2	1	2.309e-07	5.402e-07	1.925e-07
Q96C36	P5CR2	Pyrroline-5-carboxylate reductase 2 OS=Homo sapiens GN=PYCR2 PE=1 SV=1	320	33706.2	tr|A0A087WTV6|A0A087WTV6_HUMAN;tr|A0A087WZR9|A0A087WZR9_HUMAN;	4	2	11.8		1	1		1.357e-07	4.379e-07
P61026	RAB10	Ras-related protein Rab-10 OS=Homo sapiens GN=RAB10 PE=1 SV=1	200	22580.6		4	4	22.5		1	2	1	7.535e-08	1.211e-06	8.489e-07
Q15459	SF3A1	Splicing factor 3A subunit 1 OS=Homo sapiens GN=SF3A1 PE=1 SV=1	793	89064.6		4	4	7.1		3	1		2.006e-07	5.566e-08
Q92922	SMRC1	SWI/SNF complex subunit SMARCC1 OS=Homo sapiens GN=SMARCC1 PE=1 SV=3	1105	123114		4	3	7.3	Oxidation (M)	1	1	2	7.193e-08	2.211e-08	6.333e-08
Q9BVC6	TM109	Transmembrane protein 109 OS=Homo sapiens GN=TMEM109 PE=1 SV=1	243	26265.6		4	2	9.1			2	2		6.318e-07	7.345e-07
Q08J23	NSUN2	tRNA (cytosine(34)-C(5))-methyltransferase OS=Homo sapiens GN=NSUN2 PE=1 SV=2	767	86631.9		4	2	4.8		1	1	2	5.95e-08	3.578e-08	1.54e-07
O95292	VAPB	Vesicle-associated membrane protein-associated protein B/C OS=Homo sapiens GN=VAPB PE=1 SV=3	243	7814.1	tr|E5RK64|E5RK64_HUMAN;	4	2	36.6		1.5	1	1	1.625e-06	6.406e-07	1.16e-06
P61981	1433G	14-3-3 protein gamma OS=Homo sapiens GN=YWHAG PE=1 SV=2	247	28357		3	3	15	Oxidation (M)	1		1	1.687e-07		5.424e-07
Q6L8Q7	PDE12	2',5'-phosphodiesterase 12 OS=Homo sapiens GN=PDE12 PE=1 SV=2	609	52268.8	tr|F6T1Q0|F6T1Q0_HUMAN;	3	2	7.4		3			4.902e-08
P82673	RT35	28S ribosomal protein S35, mitochondrial OS=Homo sapiens GN=MRPS35 PE=1 SV=1	323	36911.1		3	2	11.5			1	2		2.671e-07	5.159e-07
P42765	THIM	3-ketoacyl-CoA thiolase, mitochondrial OS=Homo sapiens GN=ACAA2 PE=1 SV=2	397	41683.4	tr|A0A0B4J2A4|A0A0B4J2A4_HUMAN;	3	2	9.1		1	2		3.134e-07	3.44e-07
P62249	RS16	40S ribosomal protein S16 OS=Homo sapiens GN=RPS16 PE=1 SV=2	146	17132	tr|M0R210|M0R210_HUMAN;tr|M0R3H0|M0R3H0_HUMAN;tr|Q6IPX4|Q6IPX4_HUMAN;	3	2	21		2	1		1.016e-06	4.927e-07
P83731	RL24	60S ribosomal protein L24 OS=Homo sapiens GN=RPL24 PE=1 SV=1	157	14395.8	tr|C9JNW5|C9JNW5_HUMAN;tr|C9JXB8|C9JXB8_HUMAN;	3	2	18.2	Oxidation (M)		1	2		5.439e-07	7.789e-07
Q96GD4	AURKB	Aurora kinase B OS=Homo sapiens GN=AURKB PE=1 SV=3	344	28123.9	tr|J3KT86|J3KT86_HUMAN;	3	2	11.6		2	1		1.049e-06	2.25e-07
Q562R1	ACTBL	Beta-actin-like protein 2 OS=Homo sapiens GN=ACTBL2 PE=1 SV=2	376	42084		3	8	23.9	Oxidation (M)	1	1	1	0.0001385	0.0002408	2.105e-05
P13861	KAP2	cAMP-dependent protein kinase type II-alpha regulatory subunit OS=Homo sapiens GN=PRKAR2A PE=1 SV=2	404	45598		3	3	13.4	Acetyl (Protein N-term)		1	2		1.372e-07	2.262e-07
Q96ER9	CCD51	Coiled-coil domain-containing protein 51 OS=Homo sapiens GN=CCDC51 PE=1 SV=2	411	45890.8		3	2	8.3		1	1	1	3.41e-07	2.358e-07	5.348e-07
Q13363	CTBP1	C-terminal-binding protein 1 OS=Homo sapiens GN=CTBP1 PE=1 SV=2	440	20316.7	tr|D6RAX2|D6RAX2_HUMAN;	3	2	8.6		0.99	0.99	0.99	1.114e-07	1.7e-07	2.811e-07
O43175	SERA	D-3-phosphoglycerate dehydrogenase OS=Homo sapiens GN=PHGDH PE=1 SV=4	533	56220.3	tr|A0A286YF22|A0A286YF22_HUMAN;tr|A0A2C9F2M7|A0A2C9F2M7_HUMAN;	3	3	6.1		0.99	2		1.587e-07	4.11e-07
Q16531	DDB1	DNA damage-binding protein 1 OS=Homo sapiens GN=DDB1 PE=1 SV=1	1140	127212		3	2	3.1		1		1	3.33e-08		4.924e-08
P21333	FLNA	Filamin-A OS=Homo sapiens GN=FLNA PE=1 SV=4	2647	278827	tr|A0A087WWY3|A0A087WWY3_HUMAN;tr|Q5HY54|Q5HY54_HUMAN;tr|Q60FE5|Q60FE5_HUMAN;	3	3	1.9		3			1.694e-08
O14979	HNRDL	Heterogeneous nuclear ribonucleoprotein D-like OS=Homo sapiens GN=HNRNPDL PE=1 SV=3	420	40123.7	tr|A0A087WUK2|A0A087WUK2_HUMAN;	3	2	11.8			1	1		8.027e-08	9.508e-08
P0C0S5	H2AZ	Histone H2A.Z OS=Homo sapiens GN=H2AFZ PE=1 SV=2	128	13191	sp|Q71UI9|H2AV_HUMAN;tr|C9J0D1|C9J0D1_HUMAN;	3	3	36.9		1	1	1	6.739e-07	2.224e-07	5.103e-07
P42166	LAP2A	Lamina-associated polypeptide 2, isoform alpha OS=Homo sapiens GN=TMPO PE=1 SV=2	694	75643.7		3	9	20	Gln->pyro-Glu (N-term Q)			3			2.777e-07
Q7Z4W1	DCXR	L-xylulose reductase OS=Homo sapiens GN=DCXR PE=1 SV=2	244	23634.6	tr|J3KS22|J3KS22_HUMAN;tr|J3QS36|J3QS36_HUMAN;	3	2	17.9		2	1		1.339e-07	5.09e-08
Q9BQG0	MBB1A	Myb-binding protein 1A OS=Homo sapiens GN=MYBBP1A PE=1 SV=2	1328	140517	tr|I3L1L3|I3L1L3_HUMAN;	3	3	3.3		1	1	1	3.114e-08	3.494e-08	3.249e-08
P23368	MAOM	NAD-dependent malic enzyme, mitochondrial OS=Homo sapiens GN=ME2 PE=1 SV=1	584	60004	tr|A0A1W2PPH1|A0A1W2PPH1_HUMAN;tr|A0A1W2PQH3|A0A1W2PQH3_HUMAN;tr|A0A1W2PQT3|A0A1W2PQT3_HUMAN;tr|A0A1W2PQY8|A0A1W2PQY8_HUMAN;tr|A0A1W2PR68|A0A1W2PR68_HUMAN;	3	2	4.7		1	1	1	9.428e-08	6.579e-08	1.116e-07
P16435	NCPR	NADPH--cytochrome P450 reductase OS=Homo sapiens GN=POR PE=1 SV=2	677	81860.8	tr|H0Y4R2|H0Y4R2_HUMAN;	3	3	3		1.99			1.424e-07
Q9NXX6	NSE4A	Non-structural maintenance of chromosomes element 4 homolog A OS=Homo sapiens GN=NSMCE4A PE=1 SV=2	385	44382.2		3	2	9.4		1		2	1.472e-07		4.231e-07
Q14978	NOLC1	Nucleolar and coiled-body phosphoprotein 1 OS=Homo sapiens GN=NOLC1 PE=1 SV=2	699	74811.4	tr|A0A0A0MRM9|A0A0A0MRM9_HUMAN;	3	2	3.6			2	1		1.746e-07	1.736e-08
Q8NFH3	NUP43	Nucleoporin Nup43 OS=Homo sapiens GN=NUP43 PE=1 SV=1	380	42232.5		3	2	8.2		1	1	1	2.115e-07	4.356e-07	2.591e-07
Q9Y617	SERC	Phosphoserine aminotransferase OS=Homo sapiens GN=PSAT1 PE=1 SV=2	370	40504.9		3	2	5.4		1	1	1	3.94e-07	1.566e-07	2.319e-07
Q6UN15	FIP1	Pre-mRNA 3'-end-processing factor FIP1 OS=Homo sapiens GN=FIP1L1 PE=1 SV=1	594	66648.6		3	2	6.7		2	1		1.495e-07	7.972e-08
O75400	PR40A	Pre-mRNA-processing factor 40 homolog A OS=Homo sapiens GN=PRPF40A PE=1 SV=2	957	109007		3	2	2.2			1	2		6.169e-08	1.218e-07
Q32P28	P3H1	Prolyl 3-hydroxylase 1 OS=Homo sapiens GN=P3H1 PE=1 SV=2	736	83557.2		3	2	3.4	Carbamidomethyl (C)		2			1.533e-07
O60361	NDK8	Putative nucleoside diphosphate kinase OS=Homo sapiens GN=NME2P1 PE=5 SV=1	137	32692.9	sp|P22392|NDKB_HUMAN;tr|Q32Q12|Q32Q12_HUMAN;	3	2	19.7	Oxidation (M)	0.99	1		2.787e-06	5.981e-07
Q9NP81	SYSM	Serine--tRNA ligase, mitochondrial OS=Homo sapiens GN=SARS2 PE=1 SV=1	518	65883.3	tr|M0QWZ7|M0QWZ7_HUMAN;tr|M0R2C6|M0R2C6_HUMAN;	3	2	6.9			1.98	0.99		5.013e-07	2.777e-07
P02768	ALBU	Serum albumin OS=Homo sapiens GN=ALB PE=1 SV=2	609	51665	tr|A0A0C4DGB6|A0A0C4DGB6_HUMAN;tr|B7WNR0|B7WNR0_HUMAN;tr|C9JKR2|C9JKR2_HUMAN;tr|D6RHD5|D6RHD5_HUMAN;tr|H0YA55|H0YA55_HUMAN;	3	2	6.5	Carbamidomethyl (C)		1	2		3.109e-07	6.173e-07
Q9Y5M8	SRPRB	Signal recognition particle receptor subunit beta OS=Homo sapiens GN=SRPRB PE=1 SV=3	271	17640.4	tr|H7C4H2|H7C4H2_HUMAN;	3	2	13.1			1	1		4.959e-07	5.782e-07
Q12788	TBL3	Transducin beta-like protein 3 OS=Homo sapiens GN=TBL3 PE=1 SV=2	808	77242.7	tr|J3KNP2|J3KNP2_HUMAN;	3	2	3.3			1	0.99		1.152e-07	6.483e-09
Q8NI36	WDR36	WD repeat-containing protein 36 OS=Homo sapiens GN=WDR36 PE=1 SV=1	951	99555.3	tr|A0A0A0MTB8|A0A0A0MTB8_HUMAN;	3	3	4.9		2	1		1.2e-07	7.339e-08
Q96MU7	YTDC1	YTH domain-containing protein 1 OS=Homo sapiens GN=YTHDC1 PE=1 SV=3	727	85751.9	tr|J3QR07|J3QR07_HUMAN;	3	2	3.2		2		1	1.051e-07		5.86e-08
P62750	RL23A	60S ribosomal protein L23a OS=Homo sapiens GN=RPL23A PE=1 SV=1	156	19664.1	tr|A8MUS3|A8MUS3_HUMAN;tr|H7BY10|H7BY10_HUMAN;tr|K7EJV9|K7EJV9_HUMAN;tr|K7EMA7|K7EMA7_HUMAN;tr|K7ERT8|K7ERT8_HUMAN;	2	2	35.7				1			6.177e-07
P46779	RL28	60S ribosomal protein L28 OS=Homo sapiens GN=RPL28 PE=1 SV=3	137	12400.6	tr|H0YKD8|H0YKD8_HUMAN;tr|H0YLP6|H0YLP6_HUMAN;tr|H0YMF4|H0YMF4_HUMAN;	2	2	25.8			1	1		3.066e-08	2.678e-07
P42766	RL35	60S ribosomal protein L35 OS=Homo sapiens GN=RPL35 PE=1 SV=2	123	14578.6		2	2	16.3		1		1	3.078e-07		2.322e-08
P53999	TCP4	Activated RNA polymerase II transcriptional coactivator p15 OS=Homo sapiens GN=SUB1 PE=1 SV=3	127	14422.4		2	2	33.9			1	1		6.702e-07	4.397e-06
Q9Y4W6	AFG32	AFG3-like protein 2 OS=Homo sapiens GN=AFG3L2 PE=1 SV=2	797	88762.3		2	3	3.4			1	1		8.375e-08	1.016e-07
O60716	CTND1	Catenin delta-1 OS=Homo sapiens GN=CTNND1 PE=1 SV=1	968	108392		2	2	7.1	Oxidation (M)		1			8.744e-08
O96005	CLPT1	Cleft lip and palate transmembrane protein 1 OS=Homo sapiens GN=CLPTM1 PE=1 SV=1	669	18767.7	tr|K7EQQ1|K7EQQ1_HUMAN;	2	2	9.4		2			1.052e-07
P12277	KCRB	Creatine kinase B-type OS=Homo sapiens GN=CKB PE=1 SV=1	381	42725.4		2	2	11.8	Carbamidomethyl (C)	1			3.287e-08
Q8NCM8	DYHC2	Cytoplasmic dynein 2 heavy chain 1 OS=Homo sapiens GN=DYNC2H1 PE=1 SV=4	4307	493590		2	2	0.5			1			1.893e-08
P51114	FXR1	Fragile X mental retardation syndrome-related protein 1 OS=Homo sapiens GN=FXR1 PE=1 SV=3	621	55215.6	tr|B4DXZ6|B4DXZ6_HUMAN;tr|E7EU85|E7EU85_HUMAN;tr|E9PFF5|E9PFF5_HUMAN;	2	2	5.7				1			2.428e-07
P09972	ALDOC	Fructose-bisphosphate aldolase C OS=Homo sapiens GN=ALDOC PE=1 SV=2	364	39539.3		2	2	9.1			1.98			8.122e-07
P43304	GPDM	Glycerol-3-phosphate dehydrogenase, mitochondrial OS=Homo sapiens GN=GPD2 PE=1 SV=3	727	81017.7		2	2	4.1			2			2.415e-07
P49915	GUAA	GMP synthase [glutamine-hydrolyzing] OS=Homo sapiens GN=GMPS PE=1 SV=1	693	76865.1		2	2	3			1	1		3.908e-07	8.957e-08
P08754	GNAI3	Guanine nucleotide-binding protein G(k) subunit alpha OS=Homo sapiens GN=GNAI3 PE=1 SV=3	354	40596.3		2	2	7.3				2			5.64e-07
P50502	F10A1	Hsc70-interacting protein OS=Homo sapiens GN=ST13 PE=1 SV=2	369	23949.9	sp|Q8IZP2|ST134_HUMAN;tr|F6VDH7|F6VDH7_HUMAN;tr|H7C3I1|H7C3I1_HUMAN;tr|Q3KNR6|Q3KNR6_HUMAN;	2	2	18.5		1.99			2.349e-07
P48735	IDHP	Isocitrate dehydrogenase [NADP], mitochondrial OS=Homo sapiens GN=IDH2 PE=1 SV=2	452	35397.8	tr|H0YL11|H0YL11_HUMAN;	2	2	9.3			2			4.21e-07
Q13724	MOGS	Mannosyl-oligosaccharide glucosidase OS=Homo sapiens GN=MOGS PE=1 SV=5	837	92094.7		2	3	5.9		1	1		9.01e-09	6.941e-08
Q15773	MLF2	Myeloid leukemia factor 2 OS=Homo sapiens GN=MLF2 PE=1 SV=1	248	28201.2		2	2	10.1		1	1		4.63e-08	2.076e-07
P35579	MYH9	Myosin-9 OS=Homo sapiens GN=MYH9 PE=1 SV=4	1960	226968		2	2	2.3			2			7.465e-08
P69849	NOMO3	Nodal modulator 3 OS=Homo sapiens GN=NOMO3 PE=3 SV=2	1222	139671	sp|Q15155|NOMO1_HUMAN;sp|Q5JPE7|NOMO2_HUMAN;tr|A0A087X117|A0A087X117_HUMAN;tr|A0A0G2JN29|A0A0G2JN29_HUMAN;tr|J3KN36|J3KN36_HUMAN;	2	2	2.3			1	1		2.439e-08	2.908e-08
Q9H6R4	NOL6	Nucleolar protein 6 OS=Homo sapiens GN=NOL6 PE=1 SV=2	1146	112375	tr|A0A0A0MRW6|A0A0A0MRW6_HUMAN;	2	2	4.4	Gln->pyro-Glu (N-term Q)			1			8.128e-08
Q15269	PWP2	Periodic tryptophan protein 2 homolog OS=Homo sapiens GN=PWP2 PE=2 SV=2	919	102656	tr|A0A0B4J2E5|A0A0B4J2E5_HUMAN;	2	2	3.9		1	1		2.623e-08	7.246e-08
P26196	DDX6	Probable ATP-dependent RNA helicase DDX6 OS=Homo sapiens GN=DDX6 PE=1 SV=2	483	54526.4		2	2	8.9	Oxidation (M)	1		1	1.056e-07		2.429e-07
Q8NBJ5	GT251	Procollagen galactosyltransferase 1 OS=Homo sapiens GN=COLGALT1 PE=1 SV=1	622	71770.6		2	2	4.3		1	1		8.25e-08	1.01e-07
P52565	GDIR1	Rho GDP-dissociation inhibitor 1 OS=Homo sapiens GN=ARHGDIA PE=1 SV=3	204	25869.4	tr|J3KRE2|J3KRE2_HUMAN;tr|J3KTF8|J3KTF8_HUMAN;tr|J3QQX2|J3QQX2_HUMAN;	2	2	24.8			1			4.877e-07
Q9Y4W2	LAS1L	Ribosomal biogenesis protein LAS1L OS=Homo sapiens GN=LAS1L PE=1 SV=2	734	83228.9		2	2	3.8			1	1		1.14e-07	1.537e-07
Q8TDN6	BRX1	Ribosome biogenesis protein BRX1 homolog OS=Homo sapiens GN=BRIX1 PE=1 SV=2	353	41465		2	2	7.4		1	1		1.488e-07	2.356e-07
Q14151	SAFB2	Scaffold attachment factor B2 OS=Homo sapiens GN=SAFB2 PE=1 SV=1	953	107678		2	2	2		1		1	3.255e-08		8.143e-08
P45954	ACDSB	Short/branched chain specific acyl-CoA dehydrogenase, mitochondrial OS=Homo sapiens GN=ACADSB PE=1 SV=1	432	47581.4		2	2	8.6			1			2.327e-07
Q01082	SPTB2	Spectrin beta chain, non-erythrocytic 1 OS=Homo sapiens GN=SPTBN1 PE=1 SV=2	2364	275361	tr|A0A087WUZ3|A0A087WUZ3_HUMAN;	2	3	1.6		1	1		2.38e-08	4.351e-08
Q12874	SF3A3	Splicing factor 3A subunit 3 OS=Homo sapiens GN=SF3A3 PE=1 SV=1	501	58956.3		2	2	5			2			5.443e-07
Q9NTJ3	SMC4	Structural maintenance of chromosomes protein 4 OS=Homo sapiens GN=SMC4 PE=1 SV=2	1288	144743	tr|C9JR83|C9JR83_HUMAN;tr|E9PD53|E9PD53_HUMAN;	2	2	4.5		2			8.959e-08
Q96FW1	OTUB1	Ubiquitin thioesterase OTUB1 OS=Homo sapiens GN=OTUB1 PE=1 SV=2	271	31492.6	tr|F5GYJ8|F5GYJ8_HUMAN;tr|F5GYN4|F5GYN4_HUMAN;tr|J3KR44|J3KR44_HUMAN;	2	2	14.1		1		1	3.579e-07		2.541e-07
Q15061	WDR43	WD repeat-containing protein 43 OS=Homo sapiens GN=WDR43 PE=1 SV=3	677	75041.6		2	2	6.5	Oxidation (M)	1		1	2.181e-08		2.478e-07
Q99460	PSMD1	26S proteasome non-ATPase regulatory subunit 1 OS=Homo sapiens GN=PSMD1 PE=1 SV=2	953	106054	tr|A0A087WW66|A0A087WW66_HUMAN;	1	2	3.5	Carbamidomethyl (C),Oxidation (M)		1			3.787e-08
P61353	RL27	60S ribosomal protein L27 OS=Homo sapiens GN=RPL27 PE=1 SV=2	136	16498.1	tr|K7ELC7|K7ELC7_HUMAN;	1	2	22.1				1			1.058e-06
P12814	ACTN1	Alpha-actinin-1 OS=Homo sapiens GN=ACTN1 PE=1 SV=2	892	94999.9	tr|H9KV75|H9KV75_HUMAN;	1	5	6.7	Oxidation (M)		0.99			4.015e-08
P56134	ATPK	ATP synthase subunit f, mitochondrial OS=Homo sapiens GN=ATP5J2 PE=1 SV=3	94	84272.7	tr|C9JJT5|C9JJT5_HUMAN;tr|C9JU26|C9JU26_HUMAN;tr|G3V325|G3V325_HUMAN;	1	2	44.4	Oxidation (M)		1			6.798e-07
P24941	CDK2	Cyclin-dependent kinase 2 OS=Homo sapiens GN=CDK2 PE=1 SV=2	298	24481	sp|Q00526|CDK3_HUMAN;tr|E7ESI2|E7ESI2_HUMAN;tr|G3V5T9|G3V5T9_HUMAN;tr|K7EJ83|K7EJ83_HUMAN;	1	2	10.3			1			8.884e-08
Q96RP9	EFGM	Elongation factor G, mitochondrial OS=Homo sapiens GN=GFM1 PE=1 SV=2	751	51005.4	tr|C9IZ01|C9IZ01_HUMAN;tr|F8WAU4|F8WAU4_HUMAN;	1	2	7.9			1			7.684e-08
Q92598	HS105	Heat shock protein 105 kDa OS=Homo sapiens GN=HSPH1 PE=1 SV=1	858	89019.8	tr|A0A0A0MSM0|A0A0A0MSM0_HUMAN;	1	2	3.2		1			9.664e-08
Q92769	HDAC2	Histone deacetylase 2 OS=Homo sapiens GN=HDAC2 PE=1 SV=2	488	18725.1	tr|E5RFI6|E5RFI6_HUMAN;tr|E5RFP9|E5RFP9_HUMAN;tr|E5RG37|E5RG37_HUMAN;tr|E5RGV4|E5RGV4_HUMAN;tr|E5RH52|E5RH52_HUMAN;tr|E5RHE7|E5RHE7_HUMAN;tr|E5RJ04|E5RJ04_HUMAN;tr|H3BM24|H3BM24_HUMAN;	1	4	70	Oxidation (M)		0.99			4.831e-08
O43837	IDH3B	Isocitrate dehydrogenase [NAD] subunit beta, mitochondrial OS=Homo sapiens GN=IDH3B PE=1 SV=2	385	15764	tr|A0A087WZN1|A0A087WZN1_HUMAN;tr|A0A0D9SG66|A0A0D9SG66_HUMAN;	1	2	12.4		1			8.322e-08
P40925	MDHC	Malate dehydrogenase, cytoplasmic OS=Homo sapiens GN=MDH1 PE=1 SV=4	334	23077.8	tr|B8ZZ51|B8ZZ51_HUMAN;tr|B9A041|B9A041_HUMAN;	1	2	13			1			7.288e-08
P20340	RAB6A	Ras-related protein Rab-6A OS=Homo sapiens GN=RAB6A PE=1 SV=3	208	23500.9	sp|Q9NRW1|RAB6B_HUMAN;	1	2	5.3			0.99			3.266e-07
P61006	RAB8A	Ras-related protein Rab-8A OS=Homo sapiens GN=RAB8A PE=1 SV=1	207	23707.2		1	3	17.9		1			6.599e-08
Q9BUF5	TBB6	Tubulin beta-6 chain OS=Homo sapiens GN=TUBB6 PE=1 SV=1	446	49951.1		1	7	16.8	Carbamidomethyl (C),Oxidation (M)			1			4.672e-07
Q96QK1	VPS35	Vacuolar protein sorting-associated protein 35 OS=Homo sapiens GN=VPS35 PE=1 SV=2	796	91883.1		1	3	5.3			1			3.412e-08
P60709	ACTB	Actin, cytoplasmic 1 OS=Homo sapiens GN=ACTB PE=1 SV=1	375	41817.8		279	28	87.5	Acetyl (Protein N-term),Carbamidomethyl (C),Gln->pyro-Glu (N-term Q),Oxidation (M)	46.85	51.72	46.73	1.73e-05	3.779e-05	3.386e-05
P63261	ACTG	Actin, cytoplasmic 2 OS=Homo sapiens GN=ACTG1 PE=1 SV=1	375	41873.9		24	28	87.5	Acetyl (Protein N-term),Carbamidomethyl (C),Gln->pyro-Glu (N-term Q),Oxidation (M)	6.86	6.86	9.8	5.567e-07	3.375e-06	3.533e-06
O96019	ACL6A	Actin-like protein 6A OS=Homo sapiens GN=ACTL6A PE=1 SV=1	429	47556.4		7	4	13.1		2	2	2.99	6.57e-07	9.214e-07	9.53e-07
P61160	ARP2	Actin-related protein 2 OS=Homo sapiens GN=ACTR2 PE=1 SV=1	394	38907.2	tr|F5H6T1|F5H6T1_HUMAN;	3	2	13.9		2		1	2.227e-07		1.642e-07
P15924	DESP	Desmoplakin OS=Homo sapiens GN=DSP PE=1 SV=3	2871	332415		7	6	4	Oxidation (M)	3		1	5.96e-08		2.219e-08
P13645	K1C10	Keratin, type I cytoskeletal 10 OS=Homo sapiens GN=KRT10 PE=1 SV=6	584	58953.8		73	20	39.9	Carbamidomethyl (C),Oxidation (M)	29.96	13.98	27.95	6.588e-06	2.114e-06	9.059e-06
P05783	K1C18	Keratin, type I cytoskeletal 18 OS=Homo sapiens GN=KRT18 PE=1 SV=2	430	43855.4	tr|F8VZY9|F8VZY9_HUMAN;	1	2	4.9		1			9.468e-08
P35527	K1C9	Keratin, type I cytoskeletal 9 OS=Homo sapiens GN=KRT9 PE=1 SV=3	623	62206.9		67	15	32.3	Gln->pyro-Glu (N-term Q),Oxidation (M)	27	13	26	5.589e-06	1.752e-06	7.723e-06
P04264	K2C1	Keratin, type II cytoskeletal 1 OS=Homo sapiens GN=KRT1 PE=1 SV=6	644	66179.1		135	29	42.7	Oxidation (M)	55.48	21.5	49.98	1.275e-05	5.726e-06	1.771e-05
P35908	K22E	Keratin, type II cytoskeletal 2 epidermal OS=Homo sapiens GN=KRT2 PE=1 SV=2	639	65573.3		35	18	41.9	Carbamidomethyl (C),Oxidation (M)	13.48	3.5	15	2.206e-06	2.032e-07	3.201e-06
P13647	K2C5	Keratin, type II cytoskeletal 5 OS=Homo sapiens GN=KRT5 PE=1 SV=3	590	62502.1		2	7	10	Carbamidomethyl (C)			1.97			1.352e-07

## Sheet: DHFR-Ub subtracted
peptides NOT found in DHFR-Ub sample (ranked by 219 spectral counts)										SPECTRAL COUNTS			SPECTRAL INDEX
Protein	Gene	Description	Length (AA)	mw (Da)	Indistinguishable Proteins	PSMs	Peptide Seqs	% Coverage	Modifications Observed	DHFR-Ub	219	247	DHFR-Ub	219	247
P34932	HSP74	Heat shock 70 kDa protein 4 OS=Homo sapiens GN=HSPA4 PE=1 SV=4	840	94505.4		13	6	9.5			6	7		4.807e-07	6.99e-07
O43707	ACTN4	Alpha-actinin-4 OS=Homo sapiens GN=ACTN4 PE=1 SV=2	911	105059		9	10	13.5	Oxidation (M)		5.5	1.5		4.023e-07	1.053e-07
Q9UJS0	CMC2	Calcium-binding mitochondrial carrier protein Aralar2 OS=Homo sapiens GN=SLC25A13 PE=1 SV=2	675	74326.8		9	6	14.8			5	2		5.402e-07	2.897e-07
P06899	H2B1J	Histone H2B type 1-J OS=Homo sapiens GN=HIST1H2BJ PE=1 SV=3	126	13935.6	sp|P23527|H2B1O_HUMAN;sp|P33778|H2B1B_HUMAN;sp|Q16778|H2B2E_HUMAN;sp|Q8N257|H2B3B_HUMAN;	9	5	44.4	Gln->pyro-Glu (N-term Q),Oxidation (M)		5	2		3.005e-06	7.146e-06
P14314	GLU2B	Glucosidase 2 subunit beta OS=Homo sapiens GN=PRKCSH PE=1 SV=2	528	60298.3	tr|K7ELL7|K7ELL7_HUMAN;	7	4	8.1	Oxidation (M)		4	2		5.517e-07	8.822e-08
P62879	GBB2	Guanine nucleotide-binding protein G(I)/G(S)/G(T) subunit beta-2 OS=Homo sapiens GN=GNB2 PE=1 SV=3	340	17057.6	sp|Q9HAV0|GBB4_HUMAN;tr|C9JIS1|C9JIS1_HUMAN;tr|C9JXA5|C9JXA5_HUMAN;tr|C9JZN1|C9JZN1_HUMAN;	7	2	16.4	Acetyl (Protein N-term)		3.98	2		6.096e-07	5.494e-07
P62491	RB11A	Ras-related protein Rab-11A OS=Homo sapiens GN=RAB11A PE=1 SV=3	216	22526.5	sp|Q15907|RB11B_HUMAN;tr|H3BMH2|H3BMH2_HUMAN;tr|H3BSC1|H3BSC1_HUMAN;	7	5	35.5	Acetyl (Protein N-term)		3	3		2.211e-06	1.58e-06
P06744	G6PI	Glucose-6-phosphate isomerase OS=Homo sapiens GN=GPI PE=1 SV=4	558	53494.3	tr|A0A0A0MTS2|A0A0A0MTS2_HUMAN;tr|K7EQ48|K7EQ48_HUMAN;	6	4	11.4			3	1		5.446e-07	4.763e-07
P11310	ACADM	Medium-chain specific acyl-CoA dehydrogenase, mitochondrial OS=Homo sapiens GN=ACADM PE=1 SV=1	421	50364.5	tr|B7Z9I1|B7Z9I1_HUMAN;tr|Q5T4U5|Q5T4U5_HUMAN;	6	4	12.7			3	2		3.577e-07	6.536e-07
O15173	PGRC2	Membrane-associated progesterone receptor component 2 OS=Homo sapiens GN=PGRMC2 PE=1 SV=1	223	23857.8		6	2	12.1			3	2		1.027e-06	1.254e-06
Q99832	TCPH	T-complex protein 1 subunit eta OS=Homo sapiens GN=CCT7 PE=1 SV=2	543	10505.8	tr|F8WAM2|F8WAM2_HUMAN;	6	3	44.9			2.99	2		1.179e-07	2.435e-07
P22102	PUR2	Trifunctional purine biosynthetic protein adenosine-3 OS=Homo sapiens GN=GART PE=1 SV=1	1010	107987		6	2	3.4			2	2		1.03e-07	9.771e-08
P15880	RS2	40S ribosomal protein S2 OS=Homo sapiens GN=RPS2 PE=1 SV=2	293	21194.4	tr|E9PQD7|E9PQD7_HUMAN;tr|H0YEN5|H0YEN5_HUMAN;	5	2	11.8			2	1		1.407e-06	1.751e-06
P35268	RL22	60S ribosomal protein L22 OS=Homo sapiens GN=RPL22 PE=1 SV=2	128	11179.7	tr|K7EJT5|K7EJT5_HUMAN;tr|K7EKS7|K7EKS7_HUMAN;tr|K7ELC4|K7ELC4_HUMAN;tr|K7EMH1|K7EMH1_HUMAN;tr|K7EP65|K7EP65_HUMAN;tr|K7ERI7|K7ERI7_HUMAN;	5	2	51.1			2	1		1.935e-06	4.325e-06
O43823	AKAP8	A-kinase anchor protein 8 OS=Homo sapiens GN=AKAP8 PE=1 SV=1	692	76259.2		5	2	3.8	Gln->pyro-Glu (N-term Q)		2	2		2.123e-08	4.521e-09
O60884	DNJA2	DnaJ homolog subfamily A member 2 OS=Homo sapiens GN=DNAJA2 PE=1 SV=1	412	45824.7		5	2	19.4			2	2		4.068e-07	2.158e-07
P42167	LAP2B	Lamina-associated polypeptide 2, isoforms beta/gamma OS=Homo sapiens GN=TMPO PE=1 SV=2	454	50765.5		5	10	30.4	Gln->pyro-Glu (N-term Q)		2	2		2.665e-07	2.543e-07
P0DN76	U2AF5	Splicing factor U2AF 35 kDa subunit-like protein OS=Homo sapiens GN=U2AF1L5 PE=1 SV=1	240	27908.5	sp|Q01081|U2AF1_HUMAN;	5	2	11.2	Acetyl (Protein N-term)		2	2		3.201e-07	4.379e-07
P62277	RS13	40S ribosomal protein S13 OS=Homo sapiens GN=RPS13 PE=1 SV=2	151	16758.3	tr|J3KMX5|J3KMX5_HUMAN;	4	2	18.2			2	2		7.345e-07	1.751e-06
O43402	EMC8	ER membrane protein complex subunit 8 OS=Homo sapiens GN=EMC8 PE=1 SV=1	210	23811.7		4	2	10			2	1		6.569e-07	1.025e-06
P05198	IF2A	Eukaryotic translation initiation factor 2 subunit 1 OS=Homo sapiens GN=EIF2S1 PE=1 SV=3	315	29032.3	tr|G3V4T5|G3V4T5_HUMAN;tr|H0YJS4|H0YJS4_HUMAN;	4	2	7.1			2			3.059e-07	4.731e-07
P60228	EIF3E	Eukaryotic translation initiation factor 3 subunit E OS=Homo sapiens GN=EIF3E PE=1 SV=1	445	41420.8	tr|E5RGA2|E5RGA2_HUMAN;	4	2	8			2			2.23e-07	7.469e-07
P46379	BAG6	Large proline-rich protein BAG6 OS=Homo sapiens GN=BAG6 PE=1 SV=2	1132	113701	tr|A0A024RCR6|A0A024RCR6_HUMAN;tr|A0A0G2JK23|A0A0G2JK23_HUMAN;tr|A0A0G2JL47|A0A0G2JL47_HUMAN;	4	4	5.6	Oxidation (M)		2				2.411e-07
Q9BVI4	NOC4L	Nucleolar complex protein 4 homolog OS=Homo sapiens GN=NOC4L PE=1 SV=1	516	58574.8		4	2	10.3			2			1.851e-07	3.586e-07
Q9BY77	PDIP3	Polymerase delta-interacting protein 3 OS=Homo sapiens GN=POLDIP3 PE=1 SV=2	421	24878.5	tr|F6VRR5|F6VRR5_HUMAN;tr|F8WCX5|F8WCX5_HUMAN;tr|F8WEE2|F8WEE2_HUMAN;tr|Q6R954|Q6R954_HUMAN;tr|Q8WUT1|Q8WUT1_HUMAN;	4	3	23.2			2			1.453e-07	3.038e-07
Q9BVC6	TM109	Transmembrane protein 109 OS=Homo sapiens GN=TMEM109 PE=1 SV=1	243	26265.6		4	2	9.1			1.98	1.98		6.318e-07	7.345e-07
P82673	RT35	28S ribosomal protein S35, mitochondrial OS=Homo sapiens GN=MRPS35 PE=1 SV=1	323	36911.1		3	2	11.5			1.98	1.98		2.671e-07	5.159e-07
P83731	RL24	60S ribosomal protein L24 OS=Homo sapiens GN=RPL24 PE=1 SV=1	157	14395.8	tr|C9JNW5|C9JNW5_HUMAN;tr|C9JXB8|C9JXB8_HUMAN;	3	2	18.2	Oxidation (M)		1.98	1.98		5.439e-07	7.789e-07
P13861	KAP2	cAMP-dependent protein kinase type II-alpha regulatory subunit OS=Homo sapiens GN=PRKAR2A PE=1 SV=2	404	45598		3	3	13.4	Acetyl (Protein N-term)		1.98	0.99		1.372e-07	2.262e-07
O14979	HNRDL	Heterogeneous nuclear ribonucleoprotein D-like OS=Homo sapiens GN=HNRNPDL PE=1 SV=3	420	40123.7	tr|A0A087WUK2|A0A087WUK2_HUMAN;	3	2	11.8			1.98			8.027e-08	9.508e-08
P42166	LAP2A	Lamina-associated polypeptide 2, isoform alpha OS=Homo sapiens GN=TMPO PE=1 SV=2	694	75643.7		3	9	20	Gln->pyro-Glu (N-term Q)		1	2			2.777e-07
Q14978	NOLC1	Nucleolar and coiled-body phosphoprotein 1 OS=Homo sapiens GN=NOLC1 PE=1 SV=2	699	74811.4	tr|A0A0A0MRM9|A0A0A0MRM9_HUMAN;	3	2	3.6			1	2		1.746e-07	1.736e-08
O75400	PR40A	Pre-mRNA-processing factor 40 homolog A OS=Homo sapiens GN=PRPF40A PE=1 SV=2	957	109007		3	2	2.2			1	2		6.169e-08	1.218e-07
Q32P28	P3H1	Prolyl 3-hydroxylase 1 OS=Homo sapiens GN=P3H1 PE=1 SV=2	736	83557.2		3	2	3.4	Carbamidomethyl (C)		1	2		1.533e-07
Q9NP81	SYSM	Serine--tRNA ligase, mitochondrial OS=Homo sapiens GN=SARS2 PE=1 SV=1	518	65883.3	tr|M0QWZ7|M0QWZ7_HUMAN;tr|M0R2C6|M0R2C6_HUMAN;	3	2	6.9			1	2		5.013e-07	2.777e-07
P02768	ALBU	Serum albumin OS=Homo sapiens GN=ALB PE=1 SV=2	609	51665	tr|A0A0C4DGB6|A0A0C4DGB6_HUMAN;tr|B7WNR0|B7WNR0_HUMAN;tr|C9JKR2|C9JKR2_HUMAN;tr|D6RHD5|D6RHD5_HUMAN;tr|H0YA55|H0YA55_HUMAN;	3	2	6.5	Carbamidomethyl (C)		1	1		3.109e-07	6.173e-07
Q9Y5M8	SRPRB	Signal recognition particle receptor subunit beta OS=Homo sapiens GN=SRPRB PE=1 SV=3	271	17640.4	tr|H7C4H2|H7C4H2_HUMAN;	3	2	13.1			1	2		4.959e-07	5.782e-07
Q12788	TBL3	Transducin beta-like protein 3 OS=Homo sapiens GN=TBL3 PE=1 SV=2	808	77242.7	tr|J3KNP2|J3KNP2_HUMAN;	3	2	3.3			1	2		1.152e-07	6.483e-09
P62750	RL23A	60S ribosomal protein L23a OS=Homo sapiens GN=RPL23A PE=1 SV=1	156	19664.1	tr|A8MUS3|A8MUS3_HUMAN;tr|H7BY10|H7BY10_HUMAN;tr|K7EJV9|K7EJV9_HUMAN;tr|K7EMA7|K7EMA7_HUMAN;tr|K7ERT8|K7ERT8_HUMAN;	2	2	35.7			1	1			6.177e-07
P46779	RL28	60S ribosomal protein L28 OS=Homo sapiens GN=RPL28 PE=1 SV=3	137	12400.6	tr|H0YKD8|H0YKD8_HUMAN;tr|H0YLP6|H0YLP6_HUMAN;tr|H0YMF4|H0YMF4_HUMAN;	2	2	25.8			1	0.99		3.066e-08	2.678e-07
P53999	TCP4	Activated RNA polymerase II transcriptional coactivator p15 OS=Homo sapiens GN=SUB1 PE=1 SV=3	127	14422.4		2	2	33.9			1	1		6.702e-07	4.397e-06
Q9Y4W6	AFG32	AFG3-like protein 2 OS=Homo sapiens GN=AFG3L2 PE=1 SV=2	797	88762.3		2	3	3.4			1	1		8.375e-08	1.016e-07
O60716	CTND1	Catenin delta-1 OS=Homo sapiens GN=CTNND1 PE=1 SV=1	968	108392		2	2	7.1	Oxidation (M)		1	1		8.744e-08
Q8NCM8	DYHC2	Cytoplasmic dynein 2 heavy chain 1 OS=Homo sapiens GN=DYNC2H1 PE=1 SV=4	4307	493590		2	2	0.5			1			1.893e-08
P51114	FXR1	Fragile X mental retardation syndrome-related protein 1 OS=Homo sapiens GN=FXR1 PE=1 SV=3	621	55215.6	tr|B4DXZ6|B4DXZ6_HUMAN;tr|E7EU85|E7EU85_HUMAN;tr|E9PFF5|E9PFF5_HUMAN;	2	2	5.7			1				2.428e-07
P09972	ALDOC	Fructose-bisphosphate aldolase C OS=Homo sapiens GN=ALDOC PE=1 SV=2	364	39539.3		2	2	9.1			1	1		8.122e-07
P43304	GPDM	Glycerol-3-phosphate dehydrogenase, mitochondrial OS=Homo sapiens GN=GPD2 PE=1 SV=3	727	81017.7		2	2	4.1			1	1		2.415e-07
P49915	GUAA	GMP synthase [glutamine-hydrolyzing] OS=Homo sapiens GN=GMPS PE=1 SV=1	693	76865.1		2	2	3			1			3.908e-07	8.957e-08
P08754	GNAI3	Guanine nucleotide-binding protein G(k) subunit alpha OS=Homo sapiens GN=GNAI3 PE=1 SV=3	354	40596.3		2	2	7.3			1	1			5.64e-07
P48735	IDHP	Isocitrate dehydrogenase [NADP], mitochondrial OS=Homo sapiens GN=IDH2 PE=1 SV=2	452	35397.8	tr|H0YL11|H0YL11_HUMAN;	2	2	9.3			1			4.21e-07
P35579	MYH9	Myosin-9 OS=Homo sapiens GN=MYH9 PE=1 SV=4	1960	226968		2	2	2.3			1			7.465e-08
P69849	NOMO3	Nodal modulator 3 OS=Homo sapiens GN=NOMO3 PE=3 SV=2	1222	139671	sp|Q15155|NOMO1_HUMAN;sp|Q5JPE7|NOMO2_HUMAN;tr|A0A087X117|A0A087X117_HUMAN;tr|A0A0G2JN29|A0A0G2JN29_HUMAN;tr|J3KN36|J3KN36_HUMAN;	2	2	2.3			1			2.439e-08	2.908e-08
Q9H6R4	NOL6	Nucleolar protein 6 OS=Homo sapiens GN=NOL6 PE=1 SV=2	1146	112375	tr|A0A0A0MRW6|A0A0A0MRW6_HUMAN;	2	2	4.4	Gln->pyro-Glu (N-term Q)		1				8.128e-08
P52565	GDIR1	Rho GDP-dissociation inhibitor 1 OS=Homo sapiens GN=ARHGDIA PE=1 SV=3	204	25869.4	tr|J3KRE2|J3KRE2_HUMAN;tr|J3KTF8|J3KTF8_HUMAN;tr|J3QQX2|J3QQX2_HUMAN;	2	2	24.8			1			4.877e-07
Q9Y4W2	LAS1L	Ribosomal biogenesis protein LAS1L OS=Homo sapiens GN=LAS1L PE=1 SV=2	734	83228.9		2	2	3.8			1			1.14e-07	1.537e-07
P45954	ACDSB	Short/branched chain specific acyl-CoA dehydrogenase, mitochondrial OS=Homo sapiens GN=ACADSB PE=1 SV=1	432	47581.4		2	2	8.6			1			2.327e-07
Q12874	SF3A3	Splicing factor 3A subunit 3 OS=Homo sapiens GN=SF3A3 PE=1 SV=1	501	58956.3		2	2	5			0.99	1.99		5.443e-07
Q99460	PSMD1	26S proteasome non-ATPase regulatory subunit 1 OS=Homo sapiens GN=PSMD1 PE=1 SV=2	953	106054	tr|A0A087WW66|A0A087WW66_HUMAN;	1	2	3.5	Carbamidomethyl (C),Oxidation (M)		0.99			3.787e-08
P61353	RL27	60S ribosomal protein L27 OS=Homo sapiens GN=RPL27 PE=1 SV=2	136	16498.1	tr|K7ELC7|K7ELC7_HUMAN;	1	2	22.1			0.99				1.058e-06
P12814	ACTN1	Alpha-actinin-1 OS=Homo sapiens GN=ACTN1 PE=1 SV=2	892	94999.9	tr|H9KV75|H9KV75_HUMAN;	1	5	6.7	Oxidation (M)		0.99			4.015e-08
P56134	ATPK	ATP synthase subunit f, mitochondrial OS=Homo sapiens GN=ATP5J2 PE=1 SV=3	94	84272.7	tr|C9JJT5|C9JJT5_HUMAN;tr|C9JU26|C9JU26_HUMAN;tr|G3V325|G3V325_HUMAN;	1	2	44.4	Oxidation (M)			4		6.798e-07
P24941	CDK2	Cyclin-dependent kinase 2 OS=Homo sapiens GN=CDK2 PE=1 SV=2	298	24481	sp|Q00526|CDK3_HUMAN;tr|E7ESI2|E7ESI2_HUMAN;tr|G3V5T9|G3V5T9_HUMAN;tr|K7EJ83|K7EJ83_HUMAN;	1	2	10.3				3		8.884e-08
Q96RP9	EFGM	Elongation factor G, mitochondrial OS=Homo sapiens GN=GFM1 PE=1 SV=2	751	51005.4	tr|C9IZ01|C9IZ01_HUMAN;tr|F8WAU4|F8WAU4_HUMAN;	1	2	7.9				1		7.684e-08
Q92769	HDAC2	Histone deacetylase 2 OS=Homo sapiens GN=HDAC2 PE=1 SV=2	488	18725.1	tr|E5RFI6|E5RFI6_HUMAN;tr|E5RFP9|E5RFP9_HUMAN;tr|E5RG37|E5RG37_HUMAN;tr|E5RGV4|E5RGV4_HUMAN;tr|E5RH52|E5RH52_HUMAN;tr|E5RHE7|E5RHE7_HUMAN;tr|E5RJ04|E5RJ04_HUMAN;tr|H3BM24|H3BM24_HUMAN;	1	4	70	Oxidation (M)			1		4.831e-08
P40925	MDHC	Malate dehydrogenase, cytoplasmic OS=Homo sapiens GN=MDH1 PE=1 SV=4	334	23077.8	tr|B8ZZ51|B8ZZ51_HUMAN;tr|B9A041|B9A041_HUMAN;	1	2	13				2		7.288e-08
P20340	RAB6A	Ras-related protein Rab-6A OS=Homo sapiens GN=RAB6A PE=1 SV=3	208	23500.9	sp|Q9NRW1|RAB6B_HUMAN;	1	2	5.3				1		3.266e-07
Q9BUF5	TBB6	Tubulin beta-6 chain OS=Homo sapiens GN=TUBB6 PE=1 SV=1	446	49951.1		1	7	16.8	Carbamidomethyl (C),Oxidation (M)			1			4.672e-07
Q96QK1	VPS35	Vacuolar protein sorting-associated protein 35 OS=Homo sapiens GN=VPS35 PE=1 SV=2	796	91883.1		1	3	5.3				1		3.412e-08

## Sheet: TDP43 peptides isolated
IP Prob	q-value	Peptide	Charge	MC	Sample	Matched Ions	Total ions	mW	Exp m/z	Calc m/z	Error (Da)	Error (ppm)	Protein	Protein Description	Alternative Proteins
0.999999	0	AFAFVTFADDQIAQSLCGEDLIIK	3	0	TDP43-219	36	46	2671.32	891.447	891.447	-0.000976562	-0.365573	sp|Q13148|TADBP_HUMAN	TAR DNA-binding protein 43 OS=Homo sapiens GN=TARDBP PE=1 SV=1	tr|B1AKP7|B1AKP7_HUMAN;tr|G3V162|G3V162_HUMAN;tr|A0A087WXV3|A0A087WXV3_HUMAN;tr|A0A087WYE7|A0A087WYE7_HUMAN;tr|A0A087X260|A0A087X260_HUMAN;tr|A0A087WW61|A0A087WW61_HUMAN;tr|A0A087WV68|A0A087WV68_HUMAN;tr|A0A1W2PNU8|A0A1W2PNU8_HUMAN;tr|A0A087WX67|A0A087WX67_HUMAN;tr|A0A087WXQ5|A0A087WXQ5_HUMAN;tr|A0A087WZC9|A0A087WZC9_HUMAN;tr|A0A087WYY0|A0A087WYY0_HUMAN;tr|A0A087WZM1|A0A087WZM1_HUMAN;
0.999999	0	AFAFVTFADDQIAQSLCGEDLIIK	3	0	TDP43-219	32	46	2671.32	891.782	891.447	-0.00512695	-1.91926	sp|Q13148|TADBP_HUMAN	TAR DNA-binding protein 43 OS=Homo sapiens GN=TARDBP PE=1 SV=1	tr|B1AKP7|B1AKP7_HUMAN;tr|G3V162|G3V162_HUMAN;tr|A0A087WXV3|A0A087WXV3_HUMAN;tr|A0A087WYE7|A0A087WYE7_HUMAN;tr|A0A087X260|A0A087X260_HUMAN;tr|A0A087WW61|A0A087WW61_HUMAN;tr|A0A087WV68|A0A087WV68_HUMAN;tr|A0A1W2PNU8|A0A1W2PNU8_HUMAN;tr|A0A087WX67|A0A087WX67_HUMAN;tr|A0A087WXQ5|A0A087WXQ5_HUMAN;tr|A0A087WZC9|A0A087WZC9_HUMAN;tr|A0A087WYY0|A0A087WYY0_HUMAN;tr|A0A087WZM1|A0A087WZM1_HUMAN;
0.999692	0	AFAFVTFADDQIAQSLCGEDLIIK	3	0	TDP43-219	39	92	2671.32	891.775	891.447	0.983	367.983	sp|Q13148|TADBP_HUMAN	TAR DNA-binding protein 43 OS=Homo sapiens GN=TARDBP PE=1 SV=1	tr|B1AKP7|B1AKP7_HUMAN;tr|G3V162|G3V162_HUMAN;tr|A0A087WXV3|A0A087WXV3_HUMAN;tr|A0A087WYE7|A0A087WYE7_HUMAN;tr|A0A087X260|A0A087X260_HUMAN;tr|A0A087WW61|A0A087WW61_HUMAN;tr|A0A087WV68|A0A087WV68_HUMAN;tr|A0A1W2PNU8|A0A1W2PNU8_HUMAN;tr|A0A087WX67|A0A087WX67_HUMAN;tr|A0A087WXQ5|A0A087WXQ5_HUMAN;tr|A0A087WZC9|A0A087WZC9_HUMAN;tr|A0A087WYY0|A0A087WYY0_HUMAN;tr|A0A087WZM1|A0A087WZM1_HUMAN;
0.997029	0.00105402	AFAFVTFADDQIAQSLCGEDLIIK	3	0	TDP43-219	30	92	2671.32	891.44	891.447	-0.021	-7.86128	sp|Q13148|TADBP_HUMAN	TAR DNA-binding protein 43 OS=Homo sapiens GN=TARDBP PE=1 SV=1	tr|B1AKP7|B1AKP7_HUMAN;tr|G3V162|G3V162_HUMAN;tr|A0A087WXV3|A0A087WXV3_HUMAN;tr|A0A087WYE7|A0A087WYE7_HUMAN;tr|A0A087X260|A0A087X260_HUMAN;tr|A0A087WW61|A0A087WW61_HUMAN;tr|A0A087WV68|A0A087WV68_HUMAN;tr|A0A1W2PNU8|A0A1W2PNU8_HUMAN;tr|A0A087WX67|A0A087WX67_HUMAN;tr|A0A087WXQ5|A0A087WXQ5_HUMAN;tr|A0A087WZC9|A0A087WZC9_HUMAN;tr|A0A087WYY0|A0A087WYY0_HUMAN;tr|A0A087WZM1|A0A087WZM1_HUMAN;
0.880628	0.00324224	AFAFVTFADDQIAQSLCGEDLIIK	2	0	TDP43-219	17	46	2671.32	1336.64	1336.67	-0.049	-18.343	sp|Q13148|TADBP_HUMAN	TAR DNA-binding protein 43 OS=Homo sapiens GN=TARDBP PE=1 SV=1	tr|B1AKP7|B1AKP7_HUMAN;tr|G3V162|G3V162_HUMAN;tr|A0A087WXV3|A0A087WXV3_HUMAN;tr|A0A087WYE7|A0A087WYE7_HUMAN;tr|A0A087X260|A0A087X260_HUMAN;tr|A0A087WW61|A0A087WW61_HUMAN;tr|A0A087WV68|A0A087WV68_HUMAN;tr|A0A1W2PNU8|A0A1W2PNU8_HUMAN;tr|A0A087WX67|A0A087WX67_HUMAN;tr|A0A087WXQ5|A0A087WXQ5_HUMAN;tr|A0A087WZC9|A0A087WZC9_HUMAN;tr|A0A087WYY0|A0A087WYY0_HUMAN;tr|A0A087WZM1|A0A087WZM1_HUMAN;
0.93965	0.00239904	EPNQAFGSGNNSYSGSNSGAAIGWGSASNAGSGSGFNGGFGSSMDSK	3	0	TDP43-247	25	184	4417.84	1474.29	1473.62	1.995	451.578	sp|Q13148|TADBP_HUMAN	TAR DNA-binding protein 43 OS=Homo sapiens GN=TARDBP PE=1 SV=1	tr|A0A1W2PNU8|A0A1W2PNU8_HUMAN;tr|A0A087WVX6|A0A087WVX6_HUMAN;
0.999999	0	FGGNPGGFGNQGGFGNSR	3	0	TDP43-219	20	34	1725.76	576.261	576.261	0.00402832	2.33423	sp|Q13148|TADBP_HUMAN	TAR DNA-binding protein 43 OS=Homo sapiens GN=TARDBP PE=1 SV=1	tr|A0A087WX29|A0A087WX29_HUMAN;
0.999999	0	FGGNPGGFGNQGGFGNSR	2	0	TDP43-219	21	34	1725.76	863.888	863.887	0.00402832	2.33423	sp|Q13148|TADBP_HUMAN	TAR DNA-binding protein 43 OS=Homo sapiens GN=TARDBP PE=1 SV=1	tr|A0A087WX29|A0A087WX29_HUMAN;
0.999999	0	FGGNPGGFGNQGGFGNSR	3	0	TDP43-219	26	34	1725.76	576.262	576.261	0.00708008	4.10259	sp|Q13148|TADBP_HUMAN	TAR DNA-binding protein 43 OS=Homo sapiens GN=TARDBP PE=1 SV=1	tr|A0A087WX29|A0A087WX29_HUMAN;
0.999999	0	FGGNPGGFGNQGGFGNSR	2	0	TDP43-219	24	34	1725.76	863.888	863.887	0.00402832	2.33423	sp|Q13148|TADBP_HUMAN	TAR DNA-binding protein 43 OS=Homo sapiens GN=TARDBP PE=1 SV=1	tr|A0A087WX29|A0A087WX29_HUMAN;
0.999999	0	FGGNPGGFGNQGGFGNSR	2	0	TDP43-219	23	34	1725.76	864.383	863.887	-0.0150146	-8.70028	sp|Q13148|TADBP_HUMAN	TAR DNA-binding protein 43 OS=Homo sapiens GN=TARDBP PE=1 SV=1	tr|A0A087WX29|A0A087WX29_HUMAN;
0.999999	0	FGGNPGGFGNQGGFGNSR	2	0	TDP43-219	22	34	1725.76	863.888	863.887	0.00402832	2.33423	sp|Q13148|TADBP_HUMAN	TAR DNA-binding protein 43 OS=Homo sapiens GN=TARDBP PE=1 SV=1	tr|A0A087WX29|A0A087WX29_HUMAN;
0.999999	0	FGGNPGGFGNQGGFGNSR	2	0	TDP43-219	17	34	1725.76	864.39	863.887	-0.000976562	-0.565874	sp|Q13148|TADBP_HUMAN	TAR DNA-binding protein 43 OS=Homo sapiens GN=TARDBP PE=1 SV=1	tr|A0A087WX29|A0A087WX29_HUMAN;
0.998818	0.000374322	FGGNPGGFGNQGGFGNSR	2	0	TDP43-219	24	34	1725.76	863.887	863.887	-0.001	-0.579455	sp|Q13148|TADBP_HUMAN	TAR DNA-binding protein 43 OS=Homo sapiens GN=TARDBP PE=1 SV=1	tr|A0A087WX29|A0A087WX29_HUMAN;
0.971847	0.00195982	FGGNPGGFGNQGGFGNSR	3	0	TDP43-219	15	68	1725.76	576.589	576.261	0.985	570.763	sp|Q13148|TADBP_HUMAN	TAR DNA-binding protein 43 OS=Homo sapiens GN=TARDBP PE=1 SV=1	tr|A0A087WX29|A0A087WX29_HUMAN;
0.88753	0.00312427	FGGNPGGFGNQGGFGNSR	2	0	TDP43-219	28	34	1725.76	864.382	863.887	0.989	573.081	sp|Q13148|TADBP_HUMAN	TAR DNA-binding protein 43 OS=Homo sapiens GN=TARDBP PE=1 SV=1	tr|A0A087WX29|A0A087WX29_HUMAN;
0.871953	0.00324224	FGGNPGGFGNQGGFGNSR	2	0	TDP43-219	25	34	1725.76	864.383	863.887	0.99	573.66	sp|Q13148|TADBP_HUMAN	TAR DNA-binding protein 43 OS=Homo sapiens GN=TARDBP PE=1 SV=1	tr|A0A087WX29|A0A087WX29_HUMAN;
0.85419	0.00324224	FGGNPGGFGNQGGFGNSR	2	0	TDP43-219	24	34	1725.76	864.382	863.887	0.988	572.501	sp|Q13148|TADBP_HUMAN	TAR DNA-binding protein 43 OS=Homo sapiens GN=TARDBP PE=1 SV=1	tr|A0A087WX29|A0A087WX29_HUMAN;
0.790562	0.00410896	FGGNPGGFGNQGGFGNSR	2	0	TDP43-219	25	34	1725.76	864.38	863.887	0.985	570.763	sp|Q13148|TADBP_HUMAN	TAR DNA-binding protein 43 OS=Homo sapiens GN=TARDBP PE=1 SV=1	tr|A0A087WX29|A0A087WX29_HUMAN;
0.788023	0.00410896	FGGNPGGFGNQGGFGNSR	2	0	TDP43-219	25	34	1725.76	864.38	863.887	0.984	570.184	sp|Q13148|TADBP_HUMAN	TAR DNA-binding protein 43 OS=Homo sapiens GN=TARDBP PE=1 SV=1	tr|A0A087WX29|A0A087WX29_HUMAN;
0.75991	0.00469057	FGGNPGGFGNQGGFGNSR	2	0	TDP43-219	25	34	1725.76	864.38	863.887	0.985	570.763	sp|Q13148|TADBP_HUMAN	TAR DNA-binding protein 43 OS=Homo sapiens GN=TARDBP PE=1 SV=1	tr|A0A087WX29|A0A087WX29_HUMAN;
0.74449	0.00483055	FGGNPGGFGNQGGFGNSR	2	0	TDP43-219	22	34	1725.76	864.381	863.887	0.986	571.342	sp|Q13148|TADBP_HUMAN	TAR DNA-binding protein 43 OS=Homo sapiens GN=TARDBP PE=1 SV=1	tr|A0A087WX29|A0A087WX29_HUMAN;
0.713362	0.00536473	FGGNPGGFGNQGGFGNSR	2	0	TDP43-219	24	34	1725.76	864.38	863.887	0.985	570.763	sp|Q13148|TADBP_HUMAN	TAR DNA-binding protein 43 OS=Homo sapiens GN=TARDBP PE=1 SV=1	tr|A0A087WX29|A0A087WX29_HUMAN;
0.558892	0.00791615	FGGNPGGFGNQGGFGNSR	2	0	TDP43-219	21	34	1725.76	864.38	863.887	0.985	570.763	sp|Q13148|TADBP_HUMAN	TAR DNA-binding protein 43 OS=Homo sapiens GN=TARDBP PE=1 SV=1	tr|A0A087WX29|A0A087WX29_HUMAN;
0.999999	0	FGGNPGGFGNQGGFGNSR	2	0	TDP43-247	20	34	1725.76	863.888	863.887	0.00402832	2.33423	sp|Q13148|TADBP_HUMAN	TAR DNA-binding protein 43 OS=Homo sapiens GN=TARDBP PE=1 SV=1	tr|A0A087WX29|A0A087WX29_HUMAN;
0.999999	0	FGGNPGGFGNQGGFGNSR	3	0	TDP43-247	26	34	1725.76	576.261	576.261	0.00402832	2.33423	sp|Q13148|TADBP_HUMAN	TAR DNA-binding protein 43 OS=Homo sapiens GN=TARDBP PE=1 SV=1	tr|A0A087WX29|A0A087WX29_HUMAN;
0.999999	0	FGGNPGGFGNQGGFGNSR	2	0	TDP43-247	24	34	1725.76	863.887	863.887	0.0020752	1.20248	sp|Q13148|TADBP_HUMAN	TAR DNA-binding protein 43 OS=Homo sapiens GN=TARDBP PE=1 SV=1	tr|A0A087WX29|A0A087WX29_HUMAN;
0.999999	0	FGGNPGGFGNQGGFGNSR	3	0	TDP43-247	29	34	1725.76	576.26	576.261	0.00109863	0.636606	sp|Q13148|TADBP_HUMAN	TAR DNA-binding protein 43 OS=Homo sapiens GN=TARDBP PE=1 SV=1	tr|A0A087WX29|A0A087WX29_HUMAN;
0.999999	0	FGGNPGGFGNQGGFGNSR	2	0	TDP43-247	19	34	1725.76	864.385	863.887	-0.0109863	-6.36606	sp|Q13148|TADBP_HUMAN	TAR DNA-binding protein 43 OS=Homo sapiens GN=TARDBP PE=1 SV=1	tr|A0A087WX29|A0A087WX29_HUMAN;
0.999999	0	FGGNPGGFGNQGGFGNSR	2	0	TDP43-247	25	34	1725.76	863.887	863.887	0.0020752	1.20248	sp|Q13148|TADBP_HUMAN	TAR DNA-binding protein 43 OS=Homo sapiens GN=TARDBP PE=1 SV=1	tr|A0A087WX29|A0A087WX29_HUMAN;
0.999999	0	FGGNPGGFGNQGGFGNSR	2	0	TDP43-247	22	34	1725.76	863.888	863.887	0.00402832	2.33423	sp|Q13148|TADBP_HUMAN	TAR DNA-binding protein 43 OS=Homo sapiens GN=TARDBP PE=1 SV=1	tr|A0A087WX29|A0A087WX29_HUMAN;
0.999999	0	FGGNPGGFGNQGGFGNSR	3	0	TDP43-247	27	34	1725.76	576.595	576.261	-0.00292969	-1.69762	sp|Q13148|TADBP_HUMAN	TAR DNA-binding protein 43 OS=Homo sapiens GN=TARDBP PE=1 SV=1	tr|A0A087WX29|A0A087WX29_HUMAN;
0.999999	0	FGGNPGGFGNQGGFGNSR	2	0	TDP43-247	22	34	1725.76	863.888	863.887	0.00402832	2.33423	sp|Q13148|TADBP_HUMAN	TAR DNA-binding protein 43 OS=Homo sapiens GN=TARDBP PE=1 SV=1	tr|A0A087WX29|A0A087WX29_HUMAN;
0.993767	0.00121065	FGGNPGGFGNQGGFGNSR	2	0	TDP43-247	25	34	1725.76	864.388	863.887	1	579.455	sp|Q13148|TADBP_HUMAN	TAR DNA-binding protein 43 OS=Homo sapiens GN=TARDBP PE=1 SV=1	tr|A0A087WX29|A0A087WX29_HUMAN;
0.953404	0.00225207	FGGNPGGFGNQGGFGNSR	3	0	TDP43-247	17	68	1725.76	576.589	576.261	0.985	570.763	sp|Q13148|TADBP_HUMAN	TAR DNA-binding protein 43 OS=Homo sapiens GN=TARDBP PE=1 SV=1	tr|A0A087WX29|A0A087WX29_HUMAN;
0.94863	0.00225207	FGGNPGGFGNQGGFGNSR	3	0	TDP43-247	21	68	1725.76	576.592	576.261	0.994	575.978	sp|Q13148|TADBP_HUMAN	TAR DNA-binding protein 43 OS=Homo sapiens GN=TARDBP PE=1 SV=1	tr|A0A087WX29|A0A087WX29_HUMAN;
0.935815	0.00239904	FGGNPGGFGNQGGFGNSR	3	0	TDP43-247	17	68	1725.76	576.589	576.261	0.983	569.604	sp|Q13148|TADBP_HUMAN	TAR DNA-binding protein 43 OS=Homo sapiens GN=TARDBP PE=1 SV=1	tr|A0A087WX29|A0A087WX29_HUMAN;
0.923275	0.00251632	FGGNPGGFGNQGGFGNSR	2	0	TDP43-247	26	34	1725.76	864.384	863.887	0.992	574.819	sp|Q13148|TADBP_HUMAN	TAR DNA-binding protein 43 OS=Homo sapiens GN=TARDBP PE=1 SV=1	tr|A0A087WX29|A0A087WX29_HUMAN;
0.914276	0.00251632	FGGNPGGFGNQGGFGNSR	2	0	TDP43-247	25	34	1725.76	864.385	863.887	0.994	575.978	sp|Q13148|TADBP_HUMAN	TAR DNA-binding protein 43 OS=Homo sapiens GN=TARDBP PE=1 SV=1	tr|A0A087WX29|A0A087WX29_HUMAN;
0.911135	0.00251632	FGGNPGGFGNQGGFGNSR	2	0	TDP43-247	28	34	1725.76	864.382	863.887	0.988	572.501	sp|Q13148|TADBP_HUMAN	TAR DNA-binding protein 43 OS=Homo sapiens GN=TARDBP PE=1 SV=1	tr|A0A087WX29|A0A087WX29_HUMAN;
0.867713	0.00324224	FGGNPGGFGNQGGFGNSR	2	0	TDP43-247	25	34	1725.76	864.381	863.887	0.987	571.922	sp|Q13148|TADBP_HUMAN	TAR DNA-binding protein 43 OS=Homo sapiens GN=TARDBP PE=1 SV=1	tr|A0A087WX29|A0A087WX29_HUMAN;
0.851504	0.00324224	FGGNPGGFGNQGGFGNSR	2	0	TDP43-247	29	34	1725.76	864.38	863.887	0.984	570.184	sp|Q13148|TADBP_HUMAN	TAR DNA-binding protein 43 OS=Homo sapiens GN=TARDBP PE=1 SV=1	tr|A0A087WX29|A0A087WX29_HUMAN;
0.835078	0.00338618	FGGNPGGFGNQGGFGNSR	2	0	TDP43-247	24	34	1725.76	864.381	863.887	0.987	571.922	sp|Q13148|TADBP_HUMAN	TAR DNA-binding protein 43 OS=Homo sapiens GN=TARDBP PE=1 SV=1	tr|A0A087WX29|A0A087WX29_HUMAN;
0.783241	0.00425758	FGGNPGGFGNQGGFGNSR	2	0	TDP43-247	23	34	1725.76	864.38	863.887	0.984	570.184	sp|Q13148|TADBP_HUMAN	TAR DNA-binding protein 43 OS=Homo sapiens GN=TARDBP PE=1 SV=1	tr|A0A087WX29|A0A087WX29_HUMAN;
0.746524	0.00483055	FGGNPGGFGNQGGFGNSR	2	0	TDP43-247	23	34	1725.76	864.381	863.887	0.986	571.342	sp|Q13148|TADBP_HUMAN	TAR DNA-binding protein 43 OS=Homo sapiens GN=TARDBP PE=1 SV=1	tr|A0A087WX29|A0A087WX29_HUMAN;
0.718114	0.00525131	FGGNPGGFGNQGGFGNSR	2	0	TDP43-247	22	34	1725.76	864.381	863.887	0.986	571.342	sp|Q13148|TADBP_HUMAN	TAR DNA-binding protein 43 OS=Homo sapiens GN=TARDBP PE=1 SV=1	tr|A0A087WX29|A0A087WX29_HUMAN;
0.443583	0.00994881	FGGNPGGFGNQGGFGNSR	2	0	TDP43-247	18	34	1725.76	864.38	863.887	0.984	570.184	sp|Q13148|TADBP_HUMAN	TAR DNA-binding protein 43 OS=Homo sapiens GN=TARDBP PE=1 SV=1	tr|A0A087WX29|A0A087WX29_HUMAN;
0.999999	0	GISVHISNAEPK	2	0	TDP43-219	16	22	1250.66	626.338	626.337	-0.000976562	-0.780837	sp|Q13148|TADBP_HUMAN	TAR DNA-binding protein 43 OS=Homo sapiens GN=TARDBP PE=1 SV=1	tr|B1AKP7|B1AKP7_HUMAN;tr|G3V162|G3V162_HUMAN;tr|A0A087WXV3|A0A087WXV3_HUMAN;tr|A0A087WYE7|A0A087WYE7_HUMAN;tr|A0A087X260|A0A087X260_HUMAN;tr|A0A087WW61|A0A087WW61_HUMAN;tr|A0A087WV68|A0A087WV68_HUMAN;tr|A0A1W2PNU8|A0A1W2PNU8_HUMAN;tr|A0A087WX67|A0A087WX67_HUMAN;tr|A0A087WXQ5|A0A087WXQ5_HUMAN;tr|A0A087WZC9|A0A087WZC9_HUMAN;tr|A0A087WYY0|A0A087WYY0_HUMAN;tr|A0A087WX29|A0A087WX29_HUMAN;tr|A0A087WTZ…
0.999458	0	GISVHISNAEPK	3	0	TDP43-219	14	22	1250.66	417.895	417.894	0.000976562	0.780837	sp|Q13148|TADBP_HUMAN	TAR DNA-binding protein 43 OS=Homo sapiens GN=TARDBP PE=1 SV=1	tr|B1AKP7|B1AKP7_HUMAN;tr|G3V162|G3V162_HUMAN;tr|A0A087WXV3|A0A087WXV3_HUMAN;tr|A0A087WYE7|A0A087WYE7_HUMAN;tr|A0A087X260|A0A087X260_HUMAN;tr|A0A087WW61|A0A087WW61_HUMAN;tr|A0A087WV68|A0A087WV68_HUMAN;tr|A0A1W2PNU8|A0A1W2PNU8_HUMAN;tr|A0A087WX67|A0A087WX67_HUMAN;tr|A0A087WXQ5|A0A087WXQ5_HUMAN;tr|A0A087WZC9|A0A087WZC9_HUMAN;tr|A0A087WYY0|A0A087WYY0_HUMAN;tr|A0A087WX29|A0A087WX29_HUMAN;tr|A0A087WTZ…
0.999999	0	GISVHISNAEPK	2	0	TDP43-247	15	22	1250.66	626.339	626.337	0.000976562	0.780837	sp|Q13148|TADBP_HUMAN	TAR DNA-binding protein 43 OS=Homo sapiens GN=TARDBP PE=1 SV=1	tr|B1AKP7|B1AKP7_HUMAN;tr|G3V162|G3V162_HUMAN;tr|A0A087WXV3|A0A087WXV3_HUMAN;tr|A0A087WYE7|A0A087WYE7_HUMAN;tr|A0A087X260|A0A087X260_HUMAN;tr|A0A087WW61|A0A087WW61_HUMAN;tr|A0A087WV68|A0A087WV68_HUMAN;tr|A0A1W2PNU8|A0A1W2PNU8_HUMAN;tr|A0A087WX67|A0A087WX67_HUMAN;tr|A0A087WXQ5|A0A087WXQ5_HUMAN;tr|A0A087WZC9|A0A087WZC9_HUMAN;tr|A0A087WYY0|A0A087WYY0_HUMAN;tr|A0A087WX29|A0A087WX29_HUMAN;tr|A0A087WTZ…
0.999995	0	GISVHISNAEPK	2	0	TDP43-247	20	22	1250.66	626.336	626.337	-0.005	-3.99789	sp|Q13148|TADBP_HUMAN	TAR DNA-binding protein 43 OS=Homo sapiens GN=TARDBP PE=1 SV=1	tr|B1AKP7|B1AKP7_HUMAN;tr|G3V162|G3V162_HUMAN;tr|A0A087WXV3|A0A087WXV3_HUMAN;tr|A0A087WYE7|A0A087WYE7_HUMAN;tr|A0A087X260|A0A087X260_HUMAN;tr|A0A087WW61|A0A087WW61_HUMAN;tr|A0A087WV68|A0A087WV68_HUMAN;tr|A0A1W2PNU8|A0A1W2PNU8_HUMAN;tr|A0A087WX67|A0A087WX67_HUMAN;tr|A0A087WXQ5|A0A087WXQ5_HUMAN;tr|A0A087WZC9|A0A087WZC9_HUMAN;tr|A0A087WYY0|A0A087WYY0_HUMAN;tr|A0A087WX29|A0A087WX29_HUMAN;tr|A0A087WTZ…
0.998433	0.000732265	GISVHISNAEPK	3	0	TDP43-247	17	22	1250.66	417.895	417.894	0.000976562	0.780837	sp|Q13148|TADBP_HUMAN	TAR DNA-binding protein 43 OS=Homo sapiens GN=TARDBP PE=1 SV=1	tr|B1AKP7|B1AKP7_HUMAN;tr|G3V162|G3V162_HUMAN;tr|A0A087WXV3|A0A087WXV3_HUMAN;tr|A0A087WYE7|A0A087WYE7_HUMAN;tr|A0A087X260|A0A087X260_HUMAN;tr|A0A087WW61|A0A087WW61_HUMAN;tr|A0A087WV68|A0A087WV68_HUMAN;tr|A0A1W2PNU8|A0A1W2PNU8_HUMAN;tr|A0A087WX67|A0A087WX67_HUMAN;tr|A0A087WXQ5|A0A087WXQ5_HUMAN;tr|A0A087WZC9|A0A087WZC9_HUMAN;tr|A0A087WYY0|A0A087WYY0_HUMAN;tr|A0A087WX29|A0A087WX29_HUMAN;tr|A0A087WTZ…
0.978954	0.00182633	GISVHISNAEPK	3	0	TDP43-247	15	22	1250.66	417.895	417.894	0.000976562	0.780837	sp|Q13148|TADBP_HUMAN	TAR DNA-binding protein 43 OS=Homo sapiens GN=TARDBP PE=1 SV=1	tr|B1AKP7|B1AKP7_HUMAN;tr|G3V162|G3V162_HUMAN;tr|A0A087WXV3|A0A087WXV3_HUMAN;tr|A0A087WYE7|A0A087WYE7_HUMAN;tr|A0A087X260|A0A087X260_HUMAN;tr|A0A087WW61|A0A087WW61_HUMAN;tr|A0A087WV68|A0A087WV68_HUMAN;tr|A0A1W2PNU8|A0A1W2PNU8_HUMAN;tr|A0A087WX67|A0A087WX67_HUMAN;tr|A0A087WXQ5|A0A087WXQ5_HUMAN;tr|A0A087WZC9|A0A087WZC9_HUMAN;tr|A0A087WYY0|A0A087WYY0_HUMAN;tr|A0A087WX29|A0A087WX29_HUMAN;tr|A0A087WTZ…
0.970283	0.00195982	KMDETDASSAVK	2	0	TDP43-247	16	22	1280.59	641.303	641.302	-0.001	-0.78089	sp|Q13148|TADBP_HUMAN	TAR DNA-binding protein 43 OS=Homo sapiens GN=TARDBP PE=1 SV=1	tr|B1AKP7|B1AKP7_HUMAN;tr|G3V162|G3V162_HUMAN;tr|A0A087X260|A0A087X260_HUMAN;tr|K7EJM5|K7EJM5_HUMAN;tr|A0A087WYY0|A0A087WYY0_HUMAN;tr|A0A087WX29|A0A087WX29_HUMAN;tr|K7EN94|K7EN94_HUMAN;
0.999999	0	LVEGILHAPDAGWGNLVYVVNYPK	3	0	TDP43-219	23	46	2623.38	875.802	875.467	-0.00195312	-0.744505	sp|Q13148|TADBP_HUMAN	TAR DNA-binding protein 43 OS=Homo sapiens GN=TARDBP PE=1 SV=1	tr|B1AKP7|B1AKP7_HUMAN;tr|G3V162|G3V162_HUMAN;tr|A0A087X260|A0A087X260_HUMAN;tr|A0A0A0MSV7|A0A0A0MSV7_HUMAN;tr|A0A1W2PNU8|A0A1W2PNU8_HUMAN;tr|K7EJM5|K7EJM5_HUMAN;tr|A0A087WYY0|A0A087WYY0_HUMAN;tr|A0A087WX29|A0A087WX29_HUMAN;tr|K7EN94|K7EN94_HUMAN;tr|K7EJ99|K7EJ99_HUMAN;
0.999999	0	LVEGILHAPDAGWGNLVYVVNYPK	3	0	TDP43-219	25	46	2623.38	875.469	875.467	0.00805664	3.07109	sp|Q13148|TADBP_HUMAN	TAR DNA-binding protein 43 OS=Homo sapiens GN=TARDBP PE=1 SV=1	tr|B1AKP7|B1AKP7_HUMAN;tr|G3V162|G3V162_HUMAN;tr|A0A087X260|A0A087X260_HUMAN;tr|A0A0A0MSV7|A0A0A0MSV7_HUMAN;tr|A0A1W2PNU8|A0A1W2PNU8_HUMAN;tr|K7EJM5|K7EJM5_HUMAN;tr|A0A087WYY0|A0A087WYY0_HUMAN;tr|A0A087WX29|A0A087WX29_HUMAN;tr|K7EN94|K7EN94_HUMAN;tr|K7EJ99|K7EJ99_HUMAN;
TDP43-219
TDP43-247

## Sheet: unique to DHFR-Ub
proteins isolated from INSOLUBLE fraction that are unique to DHFR-Ub
Protein	Gene	Description	Length (AA)	mw (Da)	Indistinguishable Proteins	PSMs	Peptide Seqs	% Coverage	Modifications Observed
Q15125	EBP	3-beta-hydroxysteroid-Delta(8),Delta(7)-isomerase OS=Homo sapiens GN=EBP PE=1 SV=3	230	26389.8		5	2	12.2	Acetyl (Protein N-term)
P41091	IF2G	Eukaryotic translation initiation factor 2 subunit 3 OS=Homo sapiens GN=EIF2S3 PE=1 SV=3	472	51203.3		4	3	11.7	Acetyl (Protein N-term)
Q6L8Q7	PDE12	2',5'-phosphodiesterase 12 OS=Homo sapiens GN=PDE12 PE=1 SV=2	609	52268.8	tr|F6T1Q0|F6T1Q0_HUMAN;	3	2	7.4
P21333	FLNA	Filamin-A OS=Homo sapiens GN=FLNA PE=1 SV=4	2647	278827	tr|A0A087WWY3|A0A087WWY3_HUMAN;tr|Q5HY54|Q5HY54_HUMAN;tr|Q60FE5|Q60FE5_HUMAN;	3	3	1.9
P16435	NCPR	NADPH--cytochrome P450 reductase OS=Homo sapiens GN=POR PE=1 SV=2	677	81860.8	tr|H0Y4R2|H0Y4R2_HUMAN;	3	3	3
O96005	CLPT1	Cleft lip and palate transmembrane protein 1 OS=Homo sapiens GN=CLPTM1 PE=1 SV=1	669	18767.7	tr|K7EQQ1|K7EQQ1_HUMAN;	2	2	9.4
P12277	KCRB	Creatine kinase B-type OS=Homo sapiens GN=CKB PE=1 SV=1	381	42725.4		2	2	11.8	Carbamidomethyl (C)
P50502	F10A1	Hsc70-interacting protein OS=Homo sapiens GN=ST13 PE=1 SV=2	369	23949.9	sp|Q8IZP2|ST134_HUMAN;tr|F6VDH7|F6VDH7_HUMAN;tr|H7C3I1|H7C3I1_HUMAN;tr|Q3KNR6|Q3KNR6_HUMAN;	2	2	18.5
Q9NTJ3	SMC4	Structural maintenance of chromosomes protein 4 OS=Homo sapiens GN=SMC4 PE=1 SV=2	1288	144743	tr|C9JR83|C9JR83_HUMAN;tr|E9PD53|E9PD53_HUMAN;	2	2	4.5
Q92598	HS105	Heat shock protein 105 kDa OS=Homo sapiens GN=HSPH1 PE=1 SV=1	858	89019.8	tr|A0A0A0MSM0|A0A0A0MSM0_HUMAN;	1	2	3.2
O43837	IDH3B	Isocitrate dehydrogenase [NAD] subunit beta, mitochondrial OS=Homo sapiens GN=IDH3B PE=1 SV=2	385	15764	tr|A0A087WZN1|A0A087WZN1_HUMAN;tr|A0A0D9SG66|A0A0D9SG66_HUMAN;	1	2	12.4
P61006	RAB8A	Ras-related protein Rab-8A OS=Homo sapiens GN=RAB8A PE=1 SV=1	207	23707.2		1	3	17.9

## Sheet: unique to 219
proteins isolated from INSOLUBLE fraction that are unique to TDP43-219
Protein	Gene	Description	Length (AA)	mw (Da)	Indistinguishable Proteins	PSMs	Peptide Seqs	% Coverage	Modifications Observed
Q32P28	P3H1	Prolyl 3-hydroxylase 1 OS=Homo sapiens GN=P3H1 PE=1 SV=2	736	83557.2		3	2	3.4	Carbamidomethyl (C)
P43304	GPDM	Glycerol-3-phosphate dehydrogenase, mitochondrial OS=Homo sapiens GN=GPD2 PE=1 SV=3	727	81017.7		2	2	4.1
P48735	IDHP	Isocitrate dehydrogenase [NADP], mitochondrial OS=Homo sapiens GN=IDH2 PE=1 SV=2	452	35397.8	tr|H0YL11|H0YL11_HUMAN;	2	2	9.3
P35579	MYH9	Myosin-9 OS=Homo sapiens GN=MYH9 PE=1 SV=4	1960	226968		2	2	2.3
Q12874	SF3A3	Splicing factor 3A subunit 3 OS=Homo sapiens GN=SF3A3 PE=1 SV=1	501	58956.3		2	2	5
P09972	ALDOC	Fructose-bisphosphate aldolase C OS=Homo sapiens GN=ALDOC PE=1 SV=2	364	39539.3		2	2	9.1
O60716	CTND1	Catenin delta-1 OS=Homo sapiens GN=CTNND1 PE=1 SV=1	968	108392		2	2	7.1	Oxidation (M)
Q8NCM8	DYHC2	Cytoplasmic dynein 2 heavy chain 1 OS=Homo sapiens GN=DYNC2H1 PE=1 SV=4	4307	493590		2	2	0.5
P52565	GDIR1	Rho GDP-dissociation inhibitor 1 OS=Homo sapiens GN=ARHGDIA PE=1 SV=3	204	25869.4	tr|J3KRE2|J3KRE2_HUMAN;tr|J3KTF8|J3KTF8_HUMAN;tr|J3QQX2|J3QQX2_HUMAN;	2	2	24.8
P45954	ACDSB	Short/branched chain specific acyl-CoA dehydrogenase, mitochondrial OS=Homo sapiens GN=ACADSB PE=1 SV=1	432	47581.4		2	2	8.6
Q99460	PSMD1	26S proteasome non-ATPase regulatory subunit 1 OS=Homo sapiens GN=PSMD1 PE=1 SV=2	953	106054	tr|A0A087WW66|A0A087WW66_HUMAN;	1	2	3.5	Carbamidomethyl (C),Oxidation (M)
P56134	ATPK	ATP synthase subunit f, mitochondrial OS=Homo sapiens GN=ATP5J2 PE=1 SV=3	94	84272.7	tr|C9JJT5|C9JJT5_HUMAN;tr|C9JU26|C9JU26_HUMAN;tr|G3V325|G3V325_HUMAN;	1	2	44.4	Oxidation (M)
P24941	CDK2	Cyclin-dependent kinase 2 OS=Homo sapiens GN=CDK2 PE=1 SV=2	298	24481	sp|Q00526|CDK3_HUMAN;tr|E7ESI2|E7ESI2_HUMAN;tr|G3V5T9|G3V5T9_HUMAN;tr|K7EJ83|K7EJ83_HUMAN;	1	2	10.3
Q96RP9	EFGM	Elongation factor G, mitochondrial OS=Homo sapiens GN=GFM1 PE=1 SV=2	751	51005.4	tr|C9IZ01|C9IZ01_HUMAN;tr|F8WAU4|F8WAU4_HUMAN;	1	2	7.9
P40925	MDHC	Malate dehydrogenase, cytoplasmic OS=Homo sapiens GN=MDH1 PE=1 SV=4	334	23077.8	tr|B8ZZ51|B8ZZ51_HUMAN;tr|B9A041|B9A041_HUMAN;	1	2	13
Q96QK1	VPS35	Vacuolar protein sorting-associated protein 35 OS=Homo sapiens GN=VPS35 PE=1 SV=2	796	91883.1		1	3	5.3
P12814	ACTN1	Alpha-actinin-1 OS=Homo sapiens GN=ACTN1 PE=1 SV=2	892	94999.9	tr|H9KV75|H9KV75_HUMAN;	1	5	6.7	Oxidation (M)
Q92769	HDAC2	Histone deacetylase 2 OS=Homo sapiens GN=HDAC2 PE=1 SV=2	488	18725.1	tr|E5RFI6|E5RFI6_HUMAN;tr|E5RFP9|E5RFP9_HUMAN;tr|E5RG37|E5RG37_HUMAN;tr|E5RGV4|E5RGV4_HUMAN;tr|E5RH52|E5RH52_HUMAN;tr|E5RHE7|E5RHE7_HUMAN;tr|E5RJ04|E5RJ04_HUMAN;tr|H3BM24|H3BM24_HUMAN;	1	4	70	Oxidation (M)
P20340	RAB6A	Ras-related protein Rab-6A OS=Homo sapiens GN=RAB6A PE=1 SV=3	208	23500.9	sp|Q9NRW1|RAB6B_HUMAN;	1	2	5.3

## Sheet: unique to 247
proteins isolated from INSOLUBLE fraction that are unique to TDP43-247
Protein	Gene	Description	Length (AA)	mw (Da)	Indistinguishable Proteins	PSMs	Peptide Seqs	% Coverage	Modifications Observed
P46379	BAG6	Large proline-rich protein BAG6 OS=Homo sapiens GN=BAG6 PE=1 SV=2	1132	113701	tr|A0A024RCR6|A0A024RCR6_HUMAN;tr|A0A0G2JK23|A0A0G2JK23_HUMAN;tr|A0A0G2JL47|A0A0G2JL47_HUMAN;	4	4	5.6	Oxidation (M)
P42166	LAP2A	Lamina-associated polypeptide 2, isoform alpha OS=Homo sapiens GN=TMPO PE=1 SV=2	694	75643.7		3	9	20	Gln->pyro-Glu (N-term Q)
P08754	GNAI3	Guanine nucleotide-binding protein G(k) subunit alpha OS=Homo sapiens GN=GNAI3 PE=1 SV=3	354	40596.3		2	2	7.3
P62750	RL23A	60S ribosomal protein L23a OS=Homo sapiens GN=RPL23A PE=1 SV=1	156	19664.1	tr|A8MUS3|A8MUS3_HUMAN;tr|H7BY10|H7BY10_HUMAN;tr|K7EJV9|K7EJV9_HUMAN;tr|K7EMA7|K7EMA7_HUMAN;tr|K7ERT8|K7ERT8_HUMAN;	2	2	35.7
P51114	FXR1	Fragile X mental retardation syndrome-related protein 1 OS=Homo sapiens GN=FXR1 PE=1 SV=3	621	55215.6	tr|B4DXZ6|B4DXZ6_HUMAN;tr|E7EU85|E7EU85_HUMAN;tr|E9PFF5|E9PFF5_HUMAN;	2	2	5.7
Q9H6R4	NOL6	Nucleolar protein 6 OS=Homo sapiens GN=NOL6 PE=1 SV=2	1146	112375	tr|A0A0A0MRW6|A0A0A0MRW6_HUMAN;	2	2	4.4	Gln->pyro-Glu (N-term Q)
P61353	RL27	60S ribosomal protein L27 OS=Homo sapiens GN=RPL27 PE=1 SV=2	136	16498.1	tr|K7ELC7|K7ELC7_HUMAN;	1	2	22.1
Q9BUF5	TBB6	Tubulin beta-6 chain OS=Homo sapiens GN=TUBB6 PE=1 SV=1	446	49951.1		1	7	16.8	Carbamidomethyl (C),Oxidation (M)
