# Supplementary material
Source: Research Square preprint supplement (doi:10.21203/rs.3.rs-8921356/v1)
Supplement: Supplementary file 1 [file b630ed8e3aa351fbe490f88a.docx]

**Supplemental Table S1.** Plasmids used in this study.

| **Plasmid** | **Description** | **Source or Reference** |
| --- | --- | --- |
| pcDNA3.0-Neo | AmpR; NeoR; Expression vector for cloning your gene of interest | Invitrogen |
| pEGFP-N1 | KanR; NeoR; Cloning vector expressing the enhanced Green Fluorescent Protein under the control of the CMV promoter | GenBank Accession #U55762 |
| pLenti CMV GFP Hygro (656-4) | AmpR; 3rd gen lentiviral eGFP expression vector, CMV promoter, HygroR | Addgene (#17446) |
| pAAV-EF1a-Cre | AmpR; AAV-based expression vector, EF-1α promoter, HygroR | Addgene (#55636) |
| pYK027 | AmpR; NeoR; pcDNA3.0-based plasmid encoding fDHFR-UbK48R under the control of T7 or CMV promoter | Kasu. et al. 2018 |
| pYK052 | AmpR; lentiviral expression vector encoding mCherry-UbK48R under the control of CMV promoter, HygroR | This study |
| pYK053 | AmpR; lentiviral expression vector encoding mCherry-UbK48R-Val219-TDP43f under the control of CMV promoter, HygroR | This study |
| pYK054 | AmpR; lentiviral expression vector encoding mCherry-UbK48R-Val247-TDP43f under the control of CMV promoter, HygroR | This study |
| pYK056 | AmpR; lentiviral expression vector containing WPRE and encoding mCherry-UbK48R under the control of CMV promoter, HygroR | This study |
| pYK057 | AmpR; lentiviral expression vector containing WPRE and encoding mCherry-UbK48R-Val219-TDP43f under the control of CMV promoter, HygroR | This study |
| pYK058 | AmpR; lentiviral expression vector containing WPRE and encoding mCherry-UbK48R-Val247-TDP43f under the control of CMV promoter, HygroR | This study |
| pCB328 | AmpR; NeoR; pcDNA3.0-based plasmid encoding fDHFR-UbK48R-Val219-TDP43f under the control of T7 or CMV promoter | Brower et al., 2013 |
| pCB332 | AmpR; NeoR; pcDNA3.0-based plasmid encoding fDHFR-UbK48R-Val247-TDP43f under the control of T7 or CMV promoter | Brower et al., 2013 |
| pCB401 | AmpR; pGL3-Control-based plasmid encoding mCherry-UbK48R-Val247-TDP43f under the control of SV40 promoter | Kasu. et al. 2018 |
| pCB557 | AmpR; AAV-based plasmid encoding mCherry-UbK48R-Val219-TDP43f under the control of EF1α | Kasu. et al. 2022 |
| pCB559 | AmpR; AAV-based plasmid encoding mCherry-UbK48R-Val247-TDP43f under the control of EF1α | This study |

**Supplemental Table S2.** Primers used in this study

| **Primer** | **Primer’s sequence (5’ to 3’)** |
| --- | --- |
| **CB523F** | GATTGGTACCGGATCCACCATGGTGAGCAAGGGCG |
| **CB524R** | GATTGATATCGAATTCTCACTTGTCATCGTCGTCCT |
| **YK54F** | CGCGGTGGTTAGGTCTTCATCCC |
| **YK55R** | GAGCCTTAGCACAAGATGTAAGGTGGACTC |
| **YK58F** | CGGTGATATCAATCAACCTCTGGATTACAAAATTTGTG |
| **YK59R** | ATACTCGAGCGGGGAGGCGGCCC |
| **WM001F** | CTTTCTCTAGCACGGTCCCAC |
| **WM002R** | ATGCTCACACAGAGAGCCAAATTC |
| **WM003F** | AGCTGTCCATGCTGTCACTG |
| **WM004R** | GGTGGCTTCAAGATCAGCTC |
| **WM005F** | CAAGCGAACTGACAAATCTGCCGTGTCG |
| **WM006R** | GGCATCGTCACCCTTGGCATCTGG |
| **WM007F** | CCTGGAAAGAACTCTTATCC |
| **WM008R** | TCATGGCTTGGTAGATGGAC |

**REFERENCES**

Brower, C. S., Piatkov, K. I., & Varshavsky, A. (2013). Neurodegeneration-associated protein fragments as short-lived substrates of the N-end rule pathway. *Molecular Cell,* **50**(2), 161-171.

Kasu, Y., Alemu, S., Lamari, A., Loew, N., & Brower, C. S. (2018). The N Termini of TAR DNA-Binding Protein 43 (TDP43) C-Terminal Fragments Influence Degradation, Aggregation Propensity, and Morphology. *Molecular and Cellular Biology*, **38**(19), e00243-18.

Kasu Y., Arva A., Johnson J., Sajan C., Manzano J., Hennes A., Haynes J., Brower C.S. (2022) BAG6 prevents the aggregation of neurodegeneration-associated fragments of TDP43. *iScience,* **25**(5):104273.
