# Supplementary material
Source: Research Square preprint supplement (doi:10.21203/rs.3.rs-8921356/v1)
Supplement: Supplementary file 2 [file 65cf7763edeefdd80f06a8a6.xlsx]

## Sheet: ALL-Soluble
CPFP Simple Protein Overview
Results										SPECTRAL COUNTS			SPECTRAL INDEX (MIC SIn)
Protein	Gene	Description	Length (AA)	mw (Da)	Indistinguishable Proteins	PSMs	Peptide Seqs	% Coverage	Modifications Observed	DHFR-Ub	219	247	DHFR-Ub	219	247
Q71U36	TBA1A	Tubulin alpha-1A chain OS=Homo sapiens GN=TUBA1A PE=1 SV=1	451	50229.7		186	18	52.1	Carbamidomethyl (C),Gln->pyro-Glu (N-term Q),Oxidation (M)	43.09	78.39	58.8	0.000134	0.0002661	0.00019
P0CG47	UBB	Polyubiquitin-B OS=Homo sapiens GN=UBB PE=1 SV=1	229	14755	sp|P0CG48|UBC_HUMAN;sp|P62979|RS27A_HUMAN;sp|P62987|RL40_HUMAN;	132	5	61.8	Glu->pyro-Glu (N-term E)	44	39	43	0.0007585	0.0005522	0.0005789
Q16576	RBBP7	Histone-binding protein RBBP7 OS=Homo sapiens GN=RBBP7 PE=1 SV=1	425	47916.2		123	15	62.1	Carbamidomethyl (C),Oxidation (M)	27	36	36	6.645e-05	6.237e-05	7.627e-05
O94776	MTA2	Metastasis-associated protein MTA2 OS=Homo sapiens GN=MTA2 PE=1 SV=1	668	75173.9		97	26	47.9	Gln->pyro-Glu (N-term Q),Oxidation (M)	26.5	28	27.5	3.722e-05	2.827e-05	4.176e-05
P0DMV8	HS71A	Heat shock 70 kDa protein 1A OS=Homo sapiens GN=HSPA1A PE=1 SV=1	641	70189.1	sp|P0DMV9|HS71B_HUMAN;	88	21	42.6	Carbamidomethyl (C),Oxidation (M)	19.95	34.93	32.93	3.126e-05	4.686e-05	3.882e-05
Q9Y6A5	TACC3	Transforming acidic coiled-coil-containing protein 3 OS=Homo sapiens GN=TACC3 PE=1 SV=1	838	90537.9		86	25	50.1	Acetyl (Protein N-term),Carbamidomethyl (C),Oxidation (M)	17	26	33	1.673e-05	1.572e-05	2.621e-05
Q9Y2X7	GIT1	ARF GTPase-activating protein GIT1 OS=Homo sapiens GN=GIT1 PE=1 SV=2	761	84504.9		61	20	37.1	Carbamidomethyl (C),Oxidation (M)	17.5	20.5	19.5	1.331e-05	1.082e-05	1.303e-05
P23284	PPIB	Peptidyl-prolyl cis-trans isomerase B OS=Homo sapiens GN=PPIB PE=1 SV=2	216	23781.6		59	13	54.2	Carbamidomethyl (C),Oxidation (M)	15	16	23	0.0001042	8.449e-05	0.0001204
Q9Y2W1	TR150	Thyroid hormone receptor-associated protein 3 OS=Homo sapiens GN=THRAP3 PE=1 SV=2	955	108871		58	17	19.6	Oxidation (M)	15	14	22	7.793e-06	4.751e-06	1.107e-05
Q14839	CHD4	Chromodomain-helicase-DNA-binding protein 4 OS=Homo sapiens GN=CHD4 PE=1 SV=2	1912	218425		57	23	14.5	Carbamidomethyl (C),Oxidation (M)	12	15	18.5	3.385e-06	3.052e-06	4.452e-06
Q13547	HDAC1	Histone deacetylase 1 OS=Homo sapiens GN=HDAC1 PE=1 SV=1	482	55211.8		55	14	29.9	Carbamidomethyl (C),Oxidation (M)	11.5	14	14	1.395e-05	1.619e-05	2.33e-05
P07437	TBB5	Tubulin beta chain OS=Homo sapiens GN=TUBB PE=1 SV=2	444	49765		54	24	70.9	Carbamidomethyl (C),Oxidation (M)	13	23	17	2.513e-05	3.946e-05	3.703e-05
P00374	DYR	Dihydrofolate reductase OS=Homo sapiens GN=DHFR PE=1 SV=2	187	21493.1		50	7	28.9	Oxidation (M)	12.5	9	11.5	0.0003476	0.0001136	0.0001783
P25786	PSA1	Proteasome subunit alpha type-1 OS=Homo sapiens GN=PSMA1 PE=1 SV=1	263	29608.9		50	15	57.8	Carbamidomethyl (C),Oxidation (M)	16	18	14	7.082e-05	5.744e-05	4.354e-05
Q9NYF8	BCLF1	Bcl-2-associated transcription factor 1 OS=Homo sapiens GN=BCLAF1 PE=1 SV=2	920	106329		47	14	16.1	Oxidation (M)	15	13	13	1.653e-05	1.052e-05	1.242e-05
P63173	RL38	60S ribosomal protein L38 OS=Homo sapiens GN=RPL38 PE=1 SV=2	70	8230.74		45	4	50		14	18	13	0.000482	0.0004402	0.0003573
P13861	KAP2	cAMP-dependent protein kinase type II-alpha regulatory subunit OS=Homo sapiens GN=PRKAR2A PE=1 SV=2	404	45598		45	11	39.9	Acetyl (Protein N-term),Gln->pyro-Glu (N-term Q),Oxidation (M)	13.5	14.5	13.5	2.82e-05	2.2e-05	2.886e-05
P25787	PSA2	Proteasome subunit alpha type-2 OS=Homo sapiens GN=PSMA2 PE=1 SV=2	234	25936.3		45	11	57.3	Oxidation (M)	12	15	13	3.37e-05	3.112e-05	2.651e-05
Q14155	ARHG7	Rho guanine nucleotide exchange factor 7 OS=Homo sapiens GN=ARHGEF7 PE=1 SV=2	803	90189.5		45	13	20.3	Carbamidomethyl (C),Oxidation (M)	12	19	14	8.095e-06	9.074e-06	8.438e-06
P68104	EF1A1	Elongation factor 1-alpha 1 OS=Homo sapiens GN=EEF1A1 PE=1 SV=1	462	50279.2	sp|Q5VTE0|EF1A3_HUMAN;	43	10	30.7	Carbamidomethyl (C),Oxidation (M)	10.99	15	13	2.174e-05	2.384e-05	2.152e-05
P35268	RL22	60S ribosomal protein L22 OS=Homo sapiens GN=RPL22 PE=1 SV=2	128	14813.8		42	2	30.5	Carbamidomethyl (C),Oxidation (M)	10	15	15	5.973e-05	6.946e-05	7.711e-05
Q09028	RBBP4	Histone-binding protein RBBP4 OS=Homo sapiens GN=RBBP4 PE=1 SV=3	425	47752.1		41	13	48.9	Acetyl (Protein N-term),Carbamidomethyl (C),Oxidation (M)	8	14	12	2.434e-05	3.261e-05	3.047e-05
O43809	CPSF5	Cleavage and polyadenylation specificity factor subunit 5 OS=Homo sapiens GN=NUDT21 PE=1 SV=1	227	26264.8		40	7	41.4	Oxidation (M)	9	14	15	5.62e-05	5.516e-05	7.128e-05
P49721	PSB2	Proteasome subunit beta type-2 OS=Homo sapiens GN=PSMB2 PE=1 SV=1	201	22875.7		38	7	50.2	Oxidation (M)	11	12	10	4.336e-05	2.979e-05	2.85e-05
Q8WXI9	P66B	Transcriptional repressor p66-beta OS=Homo sapiens GN=GATAD2B PE=1 SV=1	593	65382.1		37	11	31.4	Carbamidomethyl (C),Oxidation (M)	12.5	10.5	12	1.786e-05	1.087e-05	1.257e-05
P28066	PSA5	Proteasome subunit alpha type-5 OS=Homo sapiens GN=PSMA5 PE=1 SV=3	241	26466.2		36	7	43.6	Carbamidomethyl (C),Oxidation (M)	11.99	11	10	2.273e-05	4.012e-05	3.144e-05
Q86YP4	P66A	Transcriptional repressor p66-alpha OS=Homo sapiens GN=GATAD2A PE=1 SV=1	633	68200.6		36	13	26.1	Oxidation (M)	11.5	11.5	12	1.081e-05	9.363e-06	1.211e-05
O14654	IRS4	Insulin receptor substrate 4 OS=Homo sapiens GN=IRS4 PE=1 SV=1	1257	134045		35	6	9.1	Carbamidomethyl (C)	7	12	11	2.438e-07	7.991e-07	9.327e-07
Q15029	U5S1	116 kDa U5 small nuclear ribonucleoprotein component OS=Homo sapiens GN=EFTUD2 PE=1 SV=1	972	109654		34	15	20.7	Carbamidomethyl (C),Oxidation (M)	8.51	9	15.51	5.332e-06	4.561e-06	1.024e-05
Q5VW36	FOCAD	Focadhesin OS=Homo sapiens GN=FOCAD PE=1 SV=1	1801	200484		32	11	8.6	Carbamidomethyl (C),Oxidation (M)	8	12	12	1.156e-06	1.166e-06	2.376e-06
P11142	HSP7C	Heat shock cognate 71 kDa protein OS=Homo sapiens GN=HSPA8 PE=1 SV=1	646	71034.3		32	13	23.7	Oxidation (M)	6	13	8	4.153e-06	8.428e-06	5.578e-06
O14818	PSA7	Proteasome subunit alpha type-7 OS=Homo sapiens GN=PSMA7 PE=1 SV=1	248	27941.7		31	7	40.3		8	8	12	3.193e-05	1.576e-05	2.235e-05
Q8NI27	THOC2	THO complex subunit 2 OS=Homo sapiens GN=THOC2 PE=1 SV=2	1593	183128		31	13	11.1	Carbamidomethyl (C),Oxidation (M)	7	10	11	1.139e-06	1.484e-06	1.715e-06
P10644	KAP0	cAMP-dependent protein kinase type I-alpha regulatory subunit OS=Homo sapiens GN=PRKAR1A PE=1 SV=1	381	43063		30	7	25.5	Oxidation (M)	8	10	10	8.036e-06	9.788e-06	1.149e-05
Q99436	PSB7	Proteasome subunit beta type-7 OS=Homo sapiens GN=PSMB7 PE=1 SV=1	277	30018.3		30	6	28.9	Carbamidomethyl (C),Oxidation (M)	7	9	13	1.891e-05	1.211e-05	1.366e-05
P28074	PSB5	Proteasome subunit beta type-5 OS=Homo sapiens GN=PSMB5 PE=1 SV=3	263	28534.2		29	8	26.2	Oxidation (M)	8	11	10	2.941e-05	2.069e-05	2.32e-05
P42677	RS27	40S ribosomal protein S27 OS=Homo sapiens GN=RPS27 PE=1 SV=3	84	9472.85		27	5	40.5	Carbamidomethyl (C),Oxidation (M)	3.53	7.55	8.06	7.474e-05	0.0001136	0.0001469
P60709	ACTB	Actin, cytoplasmic 1 OS=Homo sapiens GN=ACTB PE=1 SV=1	375	41873.9	sp|P63261|ACTG_HUMAN;	27	10	36.8	Oxidation (M)	11.87	8.93	2.98	1.802e-05	2.002e-05	8.731e-06
P17612	KAPCA	cAMP-dependent protein kinase catalytic subunit alpha OS=Homo sapiens GN=PRKACA PE=1 SV=2	351	40654.1		27	9	22.2		6	6.5	5	1.046e-05	7.965e-06	1.12e-05
Q8IX12	CCAR1	Cell division cycle and apoptosis regulator protein 1 OS=Homo sapiens GN=CCAR1 PE=1 SV=2	1150	133081		27	8	7.1	Oxidation (M)	8	7	11	2.764e-06	1.485e-06	2.997e-06
P60900	PSA6	Proteasome subunit alpha type-6 OS=Homo sapiens GN=PSMA6 PE=1 SV=1	246	27453.8		27	6	30.1	Carbamidomethyl (C),Oxidation (M)	10	9	7	3.933e-05	3.46e-05	2.635e-05
O75643	U520	U5 small nuclear ribonucleoprotein 200 kDa helicase OS=Homo sapiens GN=SNRNP200 PE=1 SV=2	2136	244983		27	13	8.8	Carbamidomethyl (C),Oxidation (M)	6	7	10	1.43e-06	1.529e-06	2.413e-06
Q13330	MTA1	Metastasis-associated protein MTA1 OS=Homo sapiens GN=MTA1 PE=1 SV=2	715	80933.4		25	14	19.3	Gln->pyro-Glu (N-term Q),Oxidation (M)	6	8	7	3.146e-06	3.857e-06	3.539e-06
P25788	PSA3	Proteasome subunit alpha type-3 OS=Homo sapiens GN=PSMA3 PE=1 SV=2	255	28487.1		25	5	22.4	Oxidation (M)	7	7	8	2.054e-05	1.783e-05	2.173e-05
P62851	RS25	40S ribosomal protein S25 OS=Homo sapiens GN=RPS25 PE=1 SV=1	125	13769.7		23	5	29.6		6	8	8	4.78e-05	4.218e-05	5.561e-05
P62829	RL23	60S ribosomal protein L23 OS=Homo sapiens GN=RPL23 PE=1 SV=1	140	14892.1		23	6	52.9	Carbamidomethyl (C),Oxidation (M)	5	9	8	7.163e-05	7.089e-05	7.619e-05
P31689	DNJA1	DnaJ homolog subfamily A member 1 OS=Homo sapiens GN=DNAJA1 PE=1 SV=2	397	44947.5		23	8	32.2	Carbamidomethyl (C)	2	11	7	3.425e-07	7.743e-06	4.098e-06
Q06830	PRDX1	Peroxiredoxin-1 OS=Homo sapiens GN=PRDX1 PE=1 SV=1	199	22150.3		23	5	24.1		9	8	6	4.216e-05	2.857e-05	2.643e-05
Q6P2Q9	PRP8	Pre-mRNA-processing-splicing factor 8 OS=Homo sapiens GN=PRPF8 PE=1 SV=2	2335	274111		23	9	5.4	Oxidation (M)	6	8	7	1.113e-06	1.269e-06	1.198e-06
P49720	PSB3	Proteasome subunit beta type-3 OS=Homo sapiens GN=PSMB3 PE=1 SV=2	205	22987.5		23	6	31.7	Carbamidomethyl (C),Oxidation (M)	5	10	8	1.854e-05	2.234e-05	2.065e-05
Q13148	TADBP	TAR DNA-binding protein 43 OS=Homo sapiens GN=TARDBP PE=1 SV=1	414	44819.4		23	3	13	Carbamidomethyl (C)		18	5		4.731e-05	2.722e-05
Q92769	HDAC2	Histone deacetylase 2 OS=Homo sapiens GN=HDAC2 PE=1 SV=2	488	55472.9		22	11	27.3	Carbamidomethyl (C),Oxidation (M)	5	6	6	4.706e-06	3.747e-06	5.055e-06
Q96CT7	CC124	Coiled-coil domain-containing protein 124 OS=Homo sapiens GN=CCDC124 PE=1 SV=1	223	25873.6		20	6	34.5		7	4	5	3.21e-05	1.161e-05	1.202e-05
P62191	PRS4	26S protease regulatory subunit 4 OS=Homo sapiens GN=PSMC1 PE=1 SV=1	440	49279.8		19	7	20	Oxidation (M)	5	9	1	3.641e-06	4.055e-06	1.464e-06
Q14161	GIT2	ARF GTPase-activating protein GIT2 OS=Homo sapiens GN=GIT2 PE=1 SV=2	759	84706.4		19	10	16.3	Carbamidomethyl (C),Oxidation (M)	3.5	7.5	6	3.561e-06	3.757e-06	3.82e-06
A0A075B6S2	KVD29	Immunoglobulin kappa variable 2D-29 OS=Homo sapiens GN=IGKV2D-29 PE=3 SV=1	120	13094.6	sp|A0A0A0MRZ7|KVD26_HUMAN;sp|A2NJV5|KV229_HUMAN;	19	2	16.7		3.96	5.94	5.94	6.037e-05	5.043e-05	5.677e-05
P06312	KV401	Immunoglobulin kappa variable 4-1 OS=Homo sapiens GN=IGKV4-1 PE=1 SV=1	121	13407.6		19	2	19.8		4	4	8	7.829e-05	5.599e-05	0.0001251
P43686	PRS6B	26S protease regulatory subunit 6B OS=Homo sapiens GN=PSMC4 PE=1 SV=2	418	47444.6		18	7	31.3	Oxidation (M)	4	7	5	2.996e-06	3.062e-06	4.429e-06
Q13200	PSMD2	26S proteasome non-ATPase regulatory subunit 2 OS=Homo sapiens GN=PSMD2 PE=1 SV=3	908	100406		18	10	14.9	Oxidation (M)	6	5	7	3.34e-06	3.51e-06	8.701e-06
Q9NR30	DDX21	Nucleolar RNA helicase 2 OS=Homo sapiens GN=DDX21 PE=1 SV=5	783	87524.5		18	6	8.8	Oxidation (M)	5	7	6	1.187e-06	1.711e-06	1.551e-06
P25789	PSA4	Proteasome subunit alpha type-4 OS=Homo sapiens GN=PSMA4 PE=1 SV=1	261	29537.2		18	9	49	Carbamidomethyl (C),Oxidation (M)	3	2	9	4.497e-06	1.743e-06	1.257e-05
P28072	PSB6	Proteasome subunit beta type-6 OS=Homo sapiens GN=PSMB6 PE=1 SV=4	239	25395.5		18	4	17.6		5	7	5	1.627e-05	1.729e-05	9.556e-06
Q16630	CPSF6	Cleavage and polyadenylation specificity factor subunit 6 OS=Homo sapiens GN=CPSF6 PE=1 SV=2	551	59335.5		17	7	18.3	Carbamidomethyl (C),Oxidation (M)	5	6	5	3.778e-06	4.078e-06	3.343e-06
P84090	ERH	Enhancer of rudimentary homolog OS=Homo sapiens GN=ERH PE=1 SV=1	104	12269		17	3	28.8	Acetyl (Protein N-term),Oxidation (M)	4	5	5	6.054e-05	3.927e-05	4.435e-05
P08238	HS90B	Heat shock protein HSP 90-beta OS=Homo sapiens GN=HSP90AB1 PE=1 SV=4	724	83428.2		17	11	21.1	Oxidation (M)	1	5.98	9.98	3.294e-07	2.834e-06	5.141e-06
P20618	PSB1	Proteasome subunit beta type-1 OS=Homo sapiens GN=PSMB1 PE=1 SV=2	241	26544.4		17	8	47.7	Oxidation (M)	5	5	7	2.199e-05	1.159e-05	2.916e-05
P28070	PSB4	Proteasome subunit beta type-4 OS=Homo sapiens GN=PSMB4 PE=1 SV=4	264	29257.5		17	5	24.2		7	6	4	2.152e-05	2.257e-05	1.498e-05
Q14331	FRG1	Protein FRG1 OS=Homo sapiens GN=FRG1 PE=1 SV=1	258	29226.2		17	4	20.2		5	6	6	1.41e-05	1.25e-05	1.432e-05
Q99996	AKAP9	A-kinase anchor protein 9 OS=Homo sapiens GN=AKAP9 PE=1 SV=3	3911	454558		16	8	2.5	Carbamidomethyl (C)	2	3	4	6.8e-08	2.369e-07	1.854e-07
P46379	BAG6	Large proline-rich protein BAG6 OS=Homo sapiens GN=BAG6 PE=1 SV=2	1132	119658		16	8	10.1	Oxidation (M)	2	11	3	1.032e-06	4.955e-06	1.533e-06
Q9Y5B6	PAXB1	PAX3- and PAX7-binding protein 1 OS=Homo sapiens GN=PAXBP1 PE=1 SV=2	917	105009		16	4	6.5	Oxidation (M)	4	6	6	1.495e-06	1.549e-06	2.358e-06
P62195	PRS8	26S protease regulatory subunit 8 OS=Homo sapiens GN=PSMC5 PE=1 SV=1	406	45705.1		15	6	15.5	Carbamidomethyl (C),Oxidation (M)	6	4	4	5.985e-06	1.953e-06	3.246e-06
P11940	PABP1	Polyadenylate-binding protein 1 OS=Homo sapiens GN=PABPC1 PE=1 SV=2	636	70806		14	6	13.4	Oxidation (M)	2	5	4.99	1.182e-06	4.706e-06	4.739e-06
O75533	SF3B1	Splicing factor 3B subunit 1 OS=Homo sapiens GN=SF3B1 PE=1 SV=3	1304	146116		14	4	5.6	Oxidation (M)	3	3	6	3.311e-07	2.879e-07	8.6e-07
P13010	XRCC5	X-ray repair cross-complementing protein 5 OS=Homo sapiens GN=XRCC5 PE=1 SV=3	732	82868.4		13	4	7.8	Oxidation (M)	3	6	3	3.13e-07	9.612e-07	1.016e-06
P62081	RS7	40S ribosomal protein S7 OS=Homo sapiens GN=RPS7 PE=1 SV=1	194	22167.3		12	5	30.9		2	4	4	1.141e-05	9.207e-06	1.096e-05
Q5T4S7	UBR4	E3 ubiquitin-protein ligase UBR4 OS=Homo sapiens GN=UBR4 PE=1 SV=1	5183	575025		12	7	2	Carbamidomethyl (C),Gln->pyro-Glu (N-term Q),Oxidation (M)	2	4	4	1.1e-07	1.104e-07	1.704e-07
P67809	YBOX1	Nuclease-sensitive element-binding protein 1 OS=Homo sapiens GN=YBX1 PE=1 SV=3	324	35992.7		12	4	16.4		2	4	3	1.345e-06	3.954e-06	4.74e-06
Q8WUA2	PPIL4	Peptidyl-prolyl cis-trans isomerase-like 4 OS=Homo sapiens GN=PPIL4 PE=1 SV=1	492	57333.6		12	5	16.1	Acetyl (Protein N-term),Carbamidomethyl (C)	3	2	6	2.068e-06	1.373e-06	8.251e-06
Q9Y383	LC7L2	Putative RNA-binding protein Luc7-like 2 OS=Homo sapiens GN=LUC7L2 PE=1 SV=2	392	46593.6		12	4	9.4	Oxidation (M)	3	4	5	2.994e-06	3.2e-06	5.201e-06
P62701	RS4X	40S ribosomal protein S4, X isoform OS=Homo sapiens GN=RPS4X PE=1 SV=2	263	29651.1		11	5	16.3		3.99	2.99	2.99	1.952e-05	1.5e-05	1.991e-05
P52272	HNRPM	Heterogeneous nuclear ribonucleoprotein M OS=Homo sapiens GN=HNRNPM PE=1 SV=3	730	77680.4		11	5	8.9		2	5	4	2.177e-06	3.356e-06	2.512e-06
O60814	H2B1K	Histone H2B type 1-K OS=Homo sapiens GN=HIST1H2BK PE=1 SV=3	126	13979.6	sp|P06899|H2B1J_HUMAN;sp|P23527|H2B1O_HUMAN;sp|P33778|H2B1B_HUMAN;sp|P57053|H2BFS_HUMAN;sp|P58876|H2B1D_HUMAN;sp|P62807|H2B1C_HUMAN;sp|Q16778|H2B2E_HUMAN;sp|Q5QNW6|H2B2F_HUMAN;sp|Q8N257|H2B3B_HUMAN;sp|Q93079|H2B1H_HUMAN;sp|Q99877|H2B1N_HUMAN;sp|Q99879|H2B1M_HUMAN;sp|Q99880|H2B1L_HUMAN;	11	3	27.8	Oxidation (M)	2	2	4	3.742e-06	2.951e-06	6.015e-06
Q32MZ4	LRRF1	Leucine-rich repeat flightless-interacting protein 1 OS=Homo sapiens GN=LRRFIP1 PE=1 SV=2	808	89432.9		11	9	12.1	Carbamidomethyl (C),Oxidation (M)	3	3	3	1.387e-06	7.095e-07	1.023e-06
Q5VU43	MYOME	Myomegalin OS=Homo sapiens GN=PDE4DIP PE=1 SV=1	2346	265620		11	2	0.5		4	3	4	5.972e-08	5.597e-08	4.976e-08
P12270	TPR	Nucleoprotein TPR OS=Homo sapiens GN=TPR PE=1 SV=3	2363	267834		11	8	4.1	Oxidation (M)	1	1	6	5.519e-08	4.468e-08	6.5e-07
Q04726	TLE3	Transducin-like enhancer protein 3 OS=Homo sapiens GN=TLE3 PE=1 SV=2	772	83580.2		11	3	6.9	Carbamidomethyl (C),Oxidation (M)	2	2	4	1.778e-06	1.128e-06	4.759e-06
O00231	PSD11	26S proteasome non-ATPase regulatory subunit 11 OS=Homo sapiens GN=PSMD11 PE=1 SV=3	422	47560.1		10	8	20.6			8	2		9.385e-06	1.613e-06
P51665	PSMD7	26S proteasome non-ATPase regulatory subunit 7 OS=Homo sapiens GN=PSMD7 PE=1 SV=2	324	37092.6		10	4	18.8		3	4	3	2.801e-06	3.57e-06	4.209e-06
P08708	RS17	40S ribosomal protein S17 OS=Homo sapiens GN=RPS17 PE=1 SV=2	135	15576.4		10	3	31.1	Oxidation (M)	3	4	3	3.46e-05	3.543e-05	5.004e-05
Q5SW79	CE170	Centrosomal protein of 170 kDa OS=Homo sapiens GN=CEP170 PE=1 SV=1	1584	175655		10	4	4.3	Oxidation (M)	3	4	2	1.492e-07	1.402e-07	5.493e-08
Q86XF0	DYR2	Dihydrofolate reductase 2, mitochondrial OS=Homo sapiens GN=DHFR2 PE=1 SV=1	187	21660.2		10	5	18.2	Gln->pyro-Glu (N-term Q),Oxidation (M)	3	2		3.883e-05	1.455e-05
P60842	IF4A1	Eukaryotic initiation factor 4A-I OS=Homo sapiens GN=EIF4A1 PE=1 SV=1	406	46232.6		10	7	24.4	Oxidation (M)	1.99	1.99	4	2.859e-06	2.594e-06	5.089e-06
Q9Y520	PRC2C	Protein PRRC2C OS=Homo sapiens GN=PRRC2C PE=1 SV=4	2896	317583		10	6	2.5		1	3	3	1.199e-08	3.072e-08	6.411e-08
P62269	RS18	40S ribosomal protein S18 OS=Homo sapiens GN=RPS18 PE=1 SV=3	152	17743.9		9	6	33.6	Oxidation (M)	3	3	1	1.237e-05	9.796e-06	2.584e-06
Q07020	RL18	60S ribosomal protein L18 OS=Homo sapiens GN=RPL18 PE=1 SV=2	188	21675.1		9	2	12.8		1	3	3	5.529e-06	1.033e-06	7.839e-06
O75592	MYCB2	E3 ubiquitin-protein ligase MYCBP2 OS=Homo sapiens GN=MYCBP2 PE=1 SV=3	4640	511146		9	3	0.7	Carbamidomethyl (C),Oxidation (M)	1	3	2	2.569e-09	4.418e-08	9.074e-09
P19338	NUCL	Nucleolin OS=Homo sapiens GN=NCL PE=1 SV=3	710	76766.5		9	3	6.3		1	4	3	6.281e-07	1.661e-06	6.251e-07
Q99460	PSMD1	26S proteasome non-ATPase regulatory subunit 1 OS=Homo sapiens GN=PSMD1 PE=1 SV=2	953	106039		8	7	10.7	Carbamidomethyl (C),Oxidation (M)	2	4	1	5.824e-07	7.738e-07	2.783e-07
P62263	RS14	40S ribosomal protein S14 OS=Homo sapiens GN=RPS14 PE=1 SV=3	151	16298.5		8	3	17.2		2	3	3	1.703e-05	1.763e-05	3.174e-05
P46782	RS5	40S ribosomal protein S5 OS=Homo sapiens GN=RPS5 PE=1 SV=4	204	22916.1		8	3	15.2	Carbamidomethyl (C)		3	2		3.02e-06	1.861e-06
P62424	RL7A	60S ribosomal protein L7a OS=Homo sapiens GN=RPL7A PE=1 SV=2	266	30049.1		8	5	20.3		3	4	1	5.374e-06	5.361e-06	7.353e-07
O43852	CALU	Calumenin OS=Homo sapiens GN=CALU PE=1 SV=2	315	37173.6		8	2	7.3		3	3	2	1.763e-06	1.491e-06	7.397e-07
P25685	DNJB1	DnaJ homolog subfamily B member 1 OS=Homo sapiens GN=DNAJB1 PE=1 SV=4	340	38110.4		8	2	7.6			4	1		2.222e-06	1.2e-06
O95071	UBR5	E3 ubiquitin-protein ligase UBR5 OS=Homo sapiens GN=UBR5 PE=1 SV=2	2799	309987		8	4	3	Oxidation (M)	1	5	1	1.679e-08	2.155e-07	1.047e-08
Q14974	IMB1	Importin subunit beta-1 OS=Homo sapiens GN=KPNB1 PE=1 SV=2	876	97360.2		8	5	10	Carbamidomethyl (C),Oxidation (M)		4	2		4.882e-07	2.259e-06
P05114	HMGN1	Non-histone chromosomal protein HMG-14 OS=Homo sapiens GN=HMGN1 PE=1 SV=3	100	10670.6		8	2	14		2	2	3	6.962e-07	1.453e-06	2.014e-06
Q15233	NONO	Non-POU domain-containing octamer-binding protein OS=Homo sapiens GN=NONO PE=1 SV=4	471	54323.4		8	4	11.7	Oxidation (M)	2	2	2	7.391e-07	8.159e-07	4.947e-07
Q5W0B1	RN219	RING finger protein 219 OS=Homo sapiens GN=RNF219 PE=1 SV=1	726	81281.8		8	3	5.8		2	3	3	2.3e-07	3.517e-07	4.576e-07
O43242	PSMD3	26S proteasome non-ATPase regulatory subunit 3 OS=Homo sapiens GN=PSMD3 PE=1 SV=2	534	61083.6		7	4	10.3	Oxidation (M)	2	3	1	7.05e-07	9.6e-07	4.822e-07
P55036	PSMD4	26S proteasome non-ATPase regulatory subunit 4 OS=Homo sapiens GN=PSMD4 PE=1 SV=1	377	40819.3		7	3	9.8	Oxidation (M)	2	3	1	1.641e-06	5.718e-06	1.048e-06
P60866	RS20	40S ribosomal protein S20 OS=Homo sapiens GN=RPS20 PE=1 SV=1	119	13382.3		7	2	19.3		3	1	3	2.841e-05	2.379e-06	2.189e-05
Q9Y223	GLCNE	Bifunctional UDP-N-acetylglucosamine 2-epimerase/N-acetylmannosamine kinase OS=Homo sapiens GN=GNE PE=1 SV=1	722	79440.2		7	4	4	Carbamidomethyl (C)	3	2	2	1.164e-06	1.075e-06	1.405e-06
Q07021	C1QBP	Complement component 1 Q subcomponent-binding protein, mitochondrial OS=Homo sapiens GN=C1QBP PE=1 SV=1	282	31414.7		7	2	15.6		2	3	1	1.289e-06	2.493e-06	1.715e-06
P78527	PRKDC	DNA-dependent protein kinase catalytic subunit OS=Homo sapiens GN=PRKDC PE=1 SV=3	4128	470013		7	5	1.9		1	3	1	9.664e-08	2.151e-07	4.711e-08
O60869	EDF1	Endothelial differentiation-related factor 1 OS=Homo sapiens GN=EDF1 PE=1 SV=1	148	16394.9		7	2	14.9		3	2	2	2.966e-06	2.411e-06	2.878e-06
Q8IWS0	PHF6	PHD finger protein 6 OS=Homo sapiens GN=PHF6 PE=1 SV=1	365	41372		7	2	9.3	Oxidation (M)	2	2	3	2.086e-07	3.199e-07	6.961e-07
Q9NYP9	MS18A	Protein Mis18-alpha OS=Homo sapiens GN=MIS18A PE=1 SV=1	233	25900.5		7	4	33.5	Carbamidomethyl (C)		2	5		1.889e-06	6.606e-06
Q96J01	THOC3	THO complex subunit 3 OS=Homo sapiens GN=THOC3 PE=1 SV=1	351	38836.9		7	3	8	Carbamidomethyl (C)		1	3		1.246e-06	5.948e-06
P55072	TERA	Transitional endoplasmic reticulum ATPase OS=Homo sapiens GN=VCP PE=1 SV=4	806	89499.9		7	5	7.6	Oxidation (M)	1	3.99	2	1.127e-07	1.516e-06	9.707e-07
P62266	RS23	40S ribosomal protein S23 OS=Homo sapiens GN=RPS23 PE=1 SV=3	143	15833.7		6	2	16.1		2	2	2	1.118e-05	8.989e-06	8.551e-06
P05388	RLA0	60S acidic ribosomal protein P0 OS=Homo sapiens GN=RPLP0 PE=1 SV=1	317	34341.9		6	2	13.6			4	2		1.931e-06	1.206e-06
P61313	RL15	60S ribosomal protein L15 OS=Homo sapiens GN=RPL15 PE=1 SV=2	204	24185.1		6	3	15.7		3	1	2	3.789e-06	8.534e-07	3.162e-06
P62917	RL8	60S ribosomal protein L8 OS=Homo sapiens GN=RPL8 PE=1 SV=2	257	28079.3		6	3	13.2		1	2		1.791e-06	3.337e-06
Q99615	DNJC7	DnaJ homolog subfamily C member 7 OS=Homo sapiens GN=DNAJC7 PE=1 SV=2	494	56548.8		6	2	3		2	2	1	2.359e-07	1.905e-07	1.53e-07
Q7Z6Z7	HUWE1	E3 ubiquitin-protein ligase HUWE1 OS=Homo sapiens GN=HUWE1 PE=1 SV=3	4374	482885		6	2	0.8		1	2	1	7.51e-08	9.456e-08	4.605e-08
O95684	FR1OP	FGFR1 oncogene partner OS=Homo sapiens GN=FGFR1OP PE=1 SV=1	399	43147		6	2	10.5	Acetyl (Protein N-term)	2	2	2	1.944e-06	1.313e-06	1.546e-06
P52292	IMA1	Importin subunit alpha-1 OS=Homo sapiens GN=KPNA2 PE=1 SV=1	529	57970		6	2	6.6			2	3		8.611e-07	2.103e-06
Q9UNZ5	L10K	Leydig cell tumor 10 kDa protein homolog OS=Homo sapiens GN=C19orf53 PE=1 SV=1	99	10588.1		6	2	10.1	Oxidation (M)	1	1	1	3.766e-07	2.873e-07	3.352e-07
P07197	NFM	Neurofilament medium polypeptide OS=Homo sapiens GN=NEFM PE=1 SV=3	916	102681		6	4	5.1	Oxidation (M)	1	2	2	1.324e-07	4.064e-07	5.062e-07
Q9NW64	RBM22	Pre-mRNA-splicing factor RBM22 OS=Homo sapiens GN=RBM22 PE=1 SV=1	420	46973.4		6	4	10	Oxidation (M)	2	1	2	2.131e-06	1.133e-06	5.31e-07
Q9Y2S6	TMA7	Translation machinery-associated protein 7 OS=Homo sapiens GN=TMA7 PE=1 SV=1	64	7079.94		6	2	15.6		2	2	2	2.528e-05	2.402e-05	5.284e-05
P62333	PRS10	26S protease regulatory subunit 10B OS=Homo sapiens GN=PSMC6 PE=1 SV=1	389	44253.2		5	2	7.5		1	1	3	1.293e-06	9.504e-07	2.411e-06
Q9UNM6	PSD13	26S proteasome non-ATPase regulatory subunit 13 OS=Homo sapiens GN=PSMD13 PE=1 SV=2	376	43026.2		5	2	6.6		2	1	2	6.038e-06	4.701e-07	3.439e-06
P23396	RS3	40S ribosomal protein S3 OS=Homo sapiens GN=RPS3 PE=1 SV=2	243	26743.5		5	2	14.4		2	1	1	6.684e-06	2.349e-06	2.823e-06
P61513	RL37A	60S ribosomal protein L37a OS=Homo sapiens GN=RPL37A PE=1 SV=2	92	10286.5		5	2	18.5	Carbamidomethyl (C)	2	1	2	1.355e-06	3.513e-06	5.122e-06
Q9UKV3	ACINU	Apoptotic chromatin condensation inducer in the nucleus OS=Homo sapiens GN=ACIN1 PE=1 SV=2	1341	152167		5	2	2.1	Oxidation (M)	1	1	1	3.693e-08	3.189e-08	5.013e-08
P35222	CTNB1	Catenin beta-1 OS=Homo sapiens GN=CTNNB1 PE=1 SV=1	781	85676.4		5	3	5.8	Oxidation (M)	1	3	1	5.228e-08	4.754e-07	2.991e-08
Q9NQS1	AVEN	Cell death regulator Aven OS=Homo sapiens GN=AVEN PE=1 SV=1	362	38590.9		5	3	13.5	Carbamidomethyl (C)		2	3		3.023e-06	4.168e-06
P06493	CDK1	Cyclin-dependent kinase 1 OS=Homo sapiens GN=CDK1 PE=1 SV=3	297	34145.9		5	2	6.1			1			1.802e-06
Q15717	ELAV1	ELAV-like protein 1 OS=Homo sapiens GN=ELAVL1 PE=1 SV=2	326	36159.2		5	2	3.7			3	2		5.381e-07	1.675e-07
P47813	IF1AX	Eukaryotic translation initiation factor 1A, X-chromosomal OS=Homo sapiens GN=EIF1AX PE=1 SV=2	144	16486.2		5	3	22.2	Carbamidomethyl (C),Oxidation (M)	2	1	1	2.413e-05	2.883e-06	4.526e-06
P09429	HMGB1	High mobility group protein B1 OS=Homo sapiens GN=HMGB1 PE=1 SV=3	215	24932.2		5	3	18.1	Carbamidomethyl (C)	1	1	2	1.124e-05	6.132e-06	1.221e-05
Q9Y5V3	MAGD1	Melanoma-associated antigen D1 OS=Homo sapiens GN=MAGED1 PE=1 SV=3	778	86323.4		5	2	5.4	Oxidation (M)	2	1	2	3.536e-07	1.635e-07	5.65e-07
P06748	NPM	Nucleophosmin OS=Homo sapiens GN=NPM1 PE=1 SV=2	294	32626.9		5	2	10.2	Oxidation (M)		3	2		2.423e-06	2.581e-06
Q8NC51	PAIRB	Plasminogen activator inhibitor 1 RNA-binding protein OS=Homo sapiens GN=SERBP1 PE=1 SV=2	408	45046.5		5	3	8.8		1	1	2	2.418e-07	4.647e-07	2.097e-06
O43143	DHX15	Pre-mRNA-splicing factor ATP-dependent RNA helicase DHX15 OS=Homo sapiens GN=DHX15 PE=1 SV=2	795	91109.3		5	3	3.8	Oxidation (M)	1	1	1	3.522e-07	2.827e-07	3.398e-07
Q13885	TBB2A	Tubulin beta-2A chain OS=Homo sapiens GN=TUBB2A PE=1 SV=1	445	50047	sp|Q9BVA1|TBB2B_HUMAN;	5	19	50.1	Carbamidomethyl (C),Oxidation (M)		1.5	3		1.502e-06	2.982e-06
P68371	TBB4B	Tubulin beta-4B chain OS=Homo sapiens GN=TUBB4B PE=1 SV=1	445	49925.1		5	22	64.3	Carbamidomethyl (C),Oxidation (M)		2.5	2		9.576e-07	6.099e-07
Q53GS9	SNUT2	U4/U6.U5 tri-snRNP-associated protein 2 OS=Homo sapiens GN=USP39 PE=1 SV=2	565	65501.8		5	2	4.4		1	2	2	1.707e-07	1.34e-07	2.228e-07
P35998	PRS7	26S protease regulatory subunit 7 OS=Homo sapiens GN=PSMC2 PE=1 SV=3	433	48729.2		4	3	7.6		1	2	1	4.594e-07	2.263e-06	3.87e-07
P62241	RS8	40S ribosomal protein S8 OS=Homo sapiens GN=RPS8 PE=1 SV=2	208	24244.2		4	2	11.5		2			5.201e-06
P26373	RL13	60S ribosomal protein L13 OS=Homo sapiens GN=RPL13 PE=1 SV=4	211	24300.6		4	2	11.4	Oxidation (M)	2	2		4.842e-06	6.888e-06
P36578	RL4	60S ribosomal protein L4 OS=Homo sapiens GN=RPL4 PE=1 SV=5	427	47793.5		4	3	11.5			2	1		2.661e-06	8.52e-07
P18124	RL7	60S ribosomal protein L7 OS=Homo sapiens GN=RPL7 PE=1 SV=1	248	29279.2		4	3	17.3		1	3		2.609e-06	3.381e-06
P27708	PYR1	CAD protein OS=Homo sapiens GN=CAD PE=1 SV=3	2225	243496		4	4	1.9	Carbamidomethyl (C)		3			5.605e-07
Q12873	CHD3	Chromodomain-helicase-DNA-binding protein 3 OS=Homo sapiens GN=CHD3 PE=1 SV=3	2000	227044		4	8	4.8	Oxidation (M)	1	1	1	1.23e-07	7.667e-08	1.012e-07
P07910	HNRPC	Heterogeneous nuclear ribonucleoproteins C1/C2 OS=Homo sapiens GN=HNRNPC PE=1 SV=4	306	33739.6		4	3	10.1			1	2		1.936e-06	5.069e-06
O95983	MBD3	Methyl-CpG-binding domain protein 3 OS=Homo sapiens GN=MBD3 PE=1 SV=1	291	32895.4		4	4	18.6	Oxidation (M)	1	1	2	2.126e-06	5.47e-07	2.735e-06
P27816	MAP4	Microtubule-associated protein 4 OS=Homo sapiens GN=MAP4 PE=1 SV=3	1152	121272		4	3	3.6		2		2	6.883e-08		5.36e-08
Q13435	SF3B2	Splicing factor 3B subunit 2 OS=Homo sapiens GN=SF3B2 PE=1 SV=2	895	100417		4	2	2.1		1	1		3.966e-07	5.009e-07
O95359	TACC2	Transforming acidic coiled-coil-containing protein 2 OS=Homo sapiens GN=TACC2 PE=1 SV=3	2948	310120		4	2	1.1		1	1	2	9.401e-08	2.207e-08	8.46e-08
Q9UBB9	TFP11	Tuftelin-interacting protein 11 OS=Homo sapiens GN=TFIP11 PE=1 SV=1	837	96992.6		4	3	5.9			1	1		3.246e-07	3.476e-07
Q05086	UBE3A	Ubiquitin-protein ligase E3A OS=Homo sapiens GN=UBE3A PE=1 SV=4	875	100876		4	2	3.3		2	1	1	1.266e-07	3.234e-08	3.676e-08
P12956	XRCC6	X-ray repair cross-complementing protein 6 OS=Homo sapiens GN=XRCC6 PE=1 SV=2	609	69979.2		4	2	3.9	Oxidation (M)	1	1	1	1.651e-06	9.56e-07	1.551e-06
P17980	PRS6A	26S protease regulatory subunit 6A OS=Homo sapiens GN=PSMC3 PE=1 SV=3	439	49298.5		3	2	5.9	Oxidation (M)		1	1		3.433e-07	4.262e-07
P48556	PSMD8	26S proteasome non-ATPase regulatory subunit 8 OS=Homo sapiens GN=PSMD8 PE=1 SV=2	350	39676.9		3	2	4.6		1	2		4.305e-06	4.467e-06
Q9NWU1	OXSM	3-oxoacyl-[acyl-carrier-protein] synthase, mitochondrial OS=Homo sapiens GN=OXSM PE=1 SV=1	459	48937.8		3	2	9.4	Carbamidomethyl (C)	1		2	6.181e-07		1.318e-06
P46781	RS9	40S ribosomal protein S9 OS=Homo sapiens GN=RPS9 PE=1 SV=3	194	22631.6		3	2	9.3		1			5.291e-07
Q02878	RL6	60S ribosomal protein L6 OS=Homo sapiens GN=RPL6 PE=1 SV=3	288	32779.7		3	2	8.7	Gln->pyro-Glu (N-term Q)		1			1.902e-07
P31323	KAP3	cAMP-dependent protein kinase type II-beta regulatory subunit OS=Homo sapiens GN=PRKAR2B PE=1 SV=3	418	46381		3	2	6.2		1	1	1	1.298e-07	1.052e-07	1.65e-07
P52434	RPAB3	DNA-directed RNA polymerases I, II, and III subunit RPABC3 OS=Homo sapiens GN=POLR2H PE=1 SV=4	150	17168.5		3	2	12.7	Acetyl (Protein N-term)		2	1		1.076e-06	1.261e-06
O60884	DNJA2	DnaJ homolog subfamily A member 2 OS=Homo sapiens GN=DNAJA2 PE=1 SV=1	412	45824.6		3	2	10.9			1	1		4.409e-07	1.286e-07
P13639	EF2	Elongation factor 2 OS=Homo sapiens GN=EEF2 PE=1 SV=4	858	95529.1		3	3	4.3	Oxidation (M)		1			1.124e-06
P07900	HS90A	Heat shock protein HSP 90-alpha OS=Homo sapiens GN=HSP90AA1 PE=1 SV=5	732	84822.8		3	4	6.6			1	1		1.018e-06	1.225e-06
P78406	RAE1L	mRNA export factor OS=Homo sapiens GN=RAE1 PE=1 SV=1	368	41049.9		3	2	4.9			1	1		3.93e-07	3.836e-07
Q9UHX1	PUF60	Poly(U)-binding-splicing factor PUF60 OS=Homo sapiens GN=PUF60 PE=1 SV=1	559	59999.7		3	2	4.8				2			1.131e-06
O95926	SYF2	Pre-mRNA-splicing factor SYF2 OS=Homo sapiens GN=SYF2 PE=1 SV=1	243	28776.8		3	2	16.9	Acetyl (Protein N-term)	2	1		7.274e-07	3.244e-07
P84103	SRSF3	Serine/arginine-rich splicing factor 3 OS=Homo sapiens GN=SRSF3 PE=1 SV=1	164	19353.9		3	2	18.3		1	2		1.962e-06	5.754e-06
P78371	TCPB	T-complex protein 1 subunit beta OS=Homo sapiens GN=CCT2 PE=1 SV=4	535	57596.2		3	2	4.1		1	1	1	1.742e-07	1.119e-07	1.155e-07
P46779	RL28	60S ribosomal protein L28 OS=Homo sapiens GN=RPL28 PE=1 SV=3	137	15773.7		2	2	16.1	Acetyl (Protein N-term),Oxidation (M)		2			1.966e-06
P32969	RL9	60S ribosomal protein L9 OS=Homo sapiens GN=RPL9 PE=1 SV=1	192	21903.8		2	2	13	Carbamidomethyl (C),Oxidation (M)			1			8.768e-08
P22694	KAPCB	cAMP-dependent protein kinase catalytic subunit beta OS=Homo sapiens GN=PRKACB PE=1 SV=2	351	40687.1		2	8	17.4			1	1		8.223e-07	9.712e-07
Q14008	CKAP5	Cytoskeleton-associated protein 5 OS=Homo sapiens GN=CKAP5 PE=1 SV=3	2032	225946		2	3	1.7	Oxidation (M)	1	1		1.301e-08	3.852e-08
P04406	G3P	Glyceraldehyde-3-phosphate dehydrogenase OS=Homo sapiens GN=GAPDH PE=1 SV=3	335	36120.4		2	2	8.7	Carbamidomethyl (C)		2			2.581e-06
Q12905	ILF2	Interleukin enhancer-binding factor 2 OS=Homo sapiens GN=ILF2 PE=1 SV=2	390	43143.2		2	2	7.7				2			1.995e-06
P09874	PARP1	Poly [ADP-ribose] polymerase 1 OS=Homo sapiens GN=PARP1 PE=1 SV=4	1014	113301		2	2	2.9		1			2.183e-07
P38159	RBMX	RNA-binding motif protein, X chromosome OS=Homo sapiens GN=RBMX PE=1 SV=3	391	42414.4		2	2	5.4				1.99			9.805e-07
Q96FV9	THOC1	THO complex subunit 1 OS=Homo sapiens GN=THOC1 PE=1 SV=1	657	75798.6		2	3	5.3	Oxidation (M)			2			1.608e-06
Q13509	TBB3	Tubulin beta-3 chain OS=Homo sapiens GN=TUBB3 PE=1 SV=2	450	50526.3		2	13	30.4	Carbamidomethyl (C),Oxidation (M)	1			1.104e-06
Q9BUF5	TBB6	Tubulin beta-6 chain OS=Homo sapiens GN=TUBB6 PE=1 SV=1	446	49951.1		2	6	13.7	Carbamidomethyl (C),Oxidation (M)			2			1.008e-06
P62249	RS16	40S ribosomal protein S16 OS=Homo sapiens GN=RPS16 PE=1 SV=2	146	16471.1		1	2	13.7				1			3.751e-06
Q71UM5	RS27L	40S ribosomal protein S27-like OS=Homo sapiens GN=RPS27L PE=1 SV=3	84	9488.88		1	3	38.1	Carbamidomethyl (C),Oxidation (M)		1			2.354e-06
P38919	IF4A3	Eukaryotic initiation factor 4A-III OS=Homo sapiens GN=EIF4A3 PE=1 SV=4	411	46949.2		1	3	9.2				1			2.645e-07
Q86YZ3	HORN	Hornerin OS=Homo sapiens GN=HRNR PE=1 SV=2	2850	283074		15	5	6.9		4	4	6	2.68e-07	2.727e-07	2.337e-07
P13645	K1C10	Keratin, type I cytoskeletal 10 OS=Homo sapiens GN=KRT10 PE=1 SV=6	584	58953.8		99	28	56	Carbamidomethyl (C),Oxidation (M)	10	55.98	30	1.699e-05	6.287e-05	3.332e-05
P08779	K1C16	Keratin, type I cytoskeletal 16 OS=Homo sapiens GN=KRT16 PE=1 SV=4	473	51362.3		1	7	12.1	Oxidation (M)	1			6.741e-07
Q04695	K1C17	Keratin, type I cytoskeletal 17 OS=Homo sapiens GN=KRT17 PE=1 SV=2	432	48202.1		6	8	14.8	Oxidation (M)	1.98			1.321e-06
P35527	K1C9	Keratin, type I cytoskeletal 9 OS=Homo sapiens GN=KRT9 PE=1 SV=3	623	62206.9		50	14	35.3	Oxidation (M)	11	24	12	1.45e-05	3.057e-05	9.869e-06
P04264	K2C1	Keratin, type II cytoskeletal 1 OS=Homo sapiens GN=KRT1 PE=1 SV=6	644	66179.1		126	31	44.1	Oxidation (M)	36.16	50.16	27	5.02e-05	7.772e-05	3.5e-05
P35908	K22E	Keratin, type II cytoskeletal 2 epidermal OS=Homo sapiens GN=KRT2 PE=1 SV=2	639	65573.3		41	22	43.8	Oxidation (M)	5	20.49	10.99	4.814e-06	2.13e-05	1.231e-05
P19013	K2C4	Keratin, type II cytoskeletal 4 OS=Homo sapiens GN=KRT4 PE=1 SV=4	534	57393.9		1	5	9.2	Oxidation (M)	0.99			1.389e-06
P04259	K2C6B	Keratin, type II cytoskeletal 6B OS=Homo sapiens GN=KRT6B PE=1 SV=5	564	60192.4		3	10	12.1		1.98	0.99		1.33e-06	6.431e-07

## Sheet: DHFR-Ub subtracted
peptides NOT found in DHFR-Ub sample (ranked by 219 spectral counts)										SPECTRAL COUNTS			SPECTRAL INDEX
Protein	Gene	Description	Length (AA)	mw (Da)	Indistinguishable Proteins	PSMs	Peptide Seqs	% Coverage	Modifications Observed	DHFR-Ub	219	247	DHFR-Ub	219	247
Q13148	TADBP	TAR DNA-binding protein 43 OS=Homo sapiens GN=TARDBP PE=1 SV=1	414	44819.4		23	3	13	Carbamidomethyl (C)		18	5		4.731e-05	2.722e-05
O00231	PSD11	26S proteasome non-ATPase regulatory subunit 11 OS=Homo sapiens GN=PSMD11 PE=1 SV=3	422	47560.1		10	8	20.6			8	2		9.385e-06	1.613e-06
Q14974	IMB1	Importin subunit beta-1 OS=Homo sapiens GN=KPNB1 PE=1 SV=2	876	97360.2		8	5	10	Carbamidomethyl (C),Oxidation (M)		4	2		4.882e-07	2.259e-06
P05388	RLA0	60S acidic ribosomal protein P0 OS=Homo sapiens GN=RPLP0 PE=1 SV=1	317	34341.9		6	2	13.6			4	2		1.931e-06	1.206e-06
P25685	DNJB1	DnaJ homolog subfamily B member 1 OS=Homo sapiens GN=DNAJB1 PE=1 SV=4	340	38110.4		8	2	7.6			4	1		2.222e-06	1.2e-06
P46782	RS5	40S ribosomal protein S5 OS=Homo sapiens GN=RPS5 PE=1 SV=4	204	22916.1		8	3	15.2	Carbamidomethyl (C)		3	2		3.02e-06	1.861e-06
Q15717	ELAV1	ELAV-like protein 1 OS=Homo sapiens GN=ELAVL1 PE=1 SV=2	326	36159.2		5	2	3.7			3	2		5.381e-07	1.675e-07
P06748	NPM	Nucleophosmin OS=Homo sapiens GN=NPM1 PE=1 SV=2	294	32626.9		5	2	10.2	Oxidation (M)		3	2		2.423e-06	2.581e-06
P27708	PYR1	CAD protein OS=Homo sapiens GN=CAD PE=1 SV=3	2225	243496		4	4	1.9	Carbamidomethyl (C)		3			5.605e-07
P68371	TBB4B	Tubulin beta-4B chain OS=Homo sapiens GN=TUBB4B PE=1 SV=1	445	49925.1		5	22	64.3	Carbamidomethyl (C),Oxidation (M)		2.5	2		9.576e-07	6.099e-07
Q9NYP9	MS18A	Protein Mis18-alpha OS=Homo sapiens GN=MIS18A PE=1 SV=1	233	25900.5		7	4	33.5	Carbamidomethyl (C)		2	5		1.889e-06	6.606e-06
P52292	IMA1	Importin subunit alpha-1 OS=Homo sapiens GN=KPNA2 PE=1 SV=1	529	57970		6	2	6.6			2	3		8.611e-07	2.103e-06
Q9NQS1	AVEN	Cell death regulator Aven OS=Homo sapiens GN=AVEN PE=1 SV=1	362	38590.9		5	3	13.5	Carbamidomethyl (C)		2	3		3.023e-06	4.168e-06
P36578	RL4	60S ribosomal protein L4 OS=Homo sapiens GN=RPL4 PE=1 SV=5	427	47793.5		4	3	11.5			2	1		2.661e-06	8.52e-07
P52434	RPAB3	DNA-directed RNA polymerases I, II, and III subunit RPABC3 OS=Homo sapiens GN=POLR2H PE=1 SV=4	150	17168.5		3	2	12.7	Acetyl (Protein N-term)		2	1		1.076e-06	1.261e-06
P46779	RL28	60S ribosomal protein L28 OS=Homo sapiens GN=RPL28 PE=1 SV=3	137	15773.7		2	2	16.1	Acetyl (Protein N-term),Oxidation (M)		2			1.966e-06
P04406	G3P	Glyceraldehyde-3-phosphate dehydrogenase OS=Homo sapiens GN=GAPDH PE=1 SV=3	335	36120.4		2	2	8.7	Carbamidomethyl (C)		2			2.581e-06
Q13885	TBB2A	Tubulin beta-2A chain OS=Homo sapiens GN=TUBB2A PE=1 SV=1	445	50047	sp|Q9BVA1|TBB2B_HUMAN;	5	19	50.1	Carbamidomethyl (C),Oxidation (M)		1.5	3		1.502e-06	2.982e-06
Q96J01	THOC3	THO complex subunit 3 OS=Homo sapiens GN=THOC3 PE=1 SV=1	351	38836.9		7	3	8	Carbamidomethyl (C)		1	3		1.246e-06	5.948e-06
P07910	HNRPC	Heterogeneous nuclear ribonucleoproteins C1/C2 OS=Homo sapiens GN=HNRNPC PE=1 SV=4	306	33739.6		4	3	10.1			1	2		1.936e-06	5.069e-06
Q9UBB9	TFP11	Tuftelin-interacting protein 11 OS=Homo sapiens GN=TFIP11 PE=1 SV=1	837	96992.6		4	3	5.9			1	1		3.246e-07	3.476e-07
P17980	PRS6A	26S protease regulatory subunit 6A OS=Homo sapiens GN=PSMC3 PE=1 SV=3	439	49298.5		3	2	5.9	Oxidation (M)		1	1		3.433e-07	4.262e-07
O60884	DNJA2	DnaJ homolog subfamily A member 2 OS=Homo sapiens GN=DNAJA2 PE=1 SV=1	412	45824.6		3	2	10.9			1	1		4.409e-07	1.286e-07
P07900	HS90A	Heat shock protein HSP 90-alpha OS=Homo sapiens GN=HSP90AA1 PE=1 SV=5	732	84822.8		3	4	6.6			1	1		1.018e-06	1.225e-06
P78406	RAE1L	mRNA export factor OS=Homo sapiens GN=RAE1 PE=1 SV=1	368	41049.9		3	2	4.9			1	1		3.93e-07	3.836e-07
P22694	KAPCB	cAMP-dependent protein kinase catalytic subunit beta OS=Homo sapiens GN=PRKACB PE=1 SV=2	351	40687.1		2	8	17.4			1	1		8.223e-07	9.712e-07
P06493	CDK1	Cyclin-dependent kinase 1 OS=Homo sapiens GN=CDK1 PE=1 SV=3	297	34145.9		5	2	6.1			1			1.802e-06
Q02878	RL6	60S ribosomal protein L6 OS=Homo sapiens GN=RPL6 PE=1 SV=3	288	32779.7		3	2	8.7	Gln->pyro-Glu (N-term Q)		1			1.902e-07
P13639	EF2	Elongation factor 2 OS=Homo sapiens GN=EEF2 PE=1 SV=4	858	95529.1		3	3	4.3	Oxidation (M)		1			1.124e-06
Q71UM5	RS27L	40S ribosomal protein S27-like OS=Homo sapiens GN=RPS27L PE=1 SV=3	84	9488.88		1	3	38.1	Carbamidomethyl (C),Oxidation (M)		1			2.354e-06
Q9UHX1	PUF60	Poly(U)-binding-splicing factor PUF60 OS=Homo sapiens GN=PUF60 PE=1 SV=1	559	59999.7		3	2	4.8				2			1.131e-06
Q12905	ILF2	Interleukin enhancer-binding factor 2 OS=Homo sapiens GN=ILF2 PE=1 SV=2	390	43143.2		2	2	7.7				2			1.995e-06
Q96FV9	THOC1	THO complex subunit 1 OS=Homo sapiens GN=THOC1 PE=1 SV=1	657	75798.6		2	3	5.3	Oxidation (M)			2			1.608e-06
Q9BUF5	TBB6	Tubulin beta-6 chain OS=Homo sapiens GN=TUBB6 PE=1 SV=1	446	49951.1		2	6	13.7	Carbamidomethyl (C),Oxidation (M)			2			1.008e-06
P38159	RBMX	RNA-binding motif protein, X chromosome OS=Homo sapiens GN=RBMX PE=1 SV=3	391	42414.4		2	2	5.4				1.99			9.805e-07
P32969	RL9	60S ribosomal protein L9 OS=Homo sapiens GN=RPL9 PE=1 SV=1	192	21903.8		2	2	13	Carbamidomethyl (C),Oxidation (M)			1			8.768e-08
P62249	RS16	40S ribosomal protein S16 OS=Homo sapiens GN=RPS16 PE=1 SV=2	146	16471.1		1	2	13.7				1			3.751e-06
P38919	IF4A3	Eukaryotic initiation factor 4A-III OS=Homo sapiens GN=EIF4A3 PE=1 SV=4	411	46949.2		1	3	9.2				1			2.645e-07

## Sheet: TDP43 peptides isolated
IP Prob	q-value	Prev AA	Peptide	Next AA	PTMs	Modified Peptide	Charge	MC	Sample	Start Scan	End Scan	Matched Ions	Total ions	mW	Exp m/z	Calc m/z	Error (Da)	Error (ppm)	Protein	Protein Description
0.999999	0.000725426	R	AFAFVTFADDQIAQSLCGEDLIIK	G	1 x Carbamidomethyl (C)	AFAFVTFADDQIAQSLC(+57.02)GEDLIIK	3	0	TDP43-219	23798	23798	23	46	2671.32	891.783	891.447	-0.00195312	-0.731144	sp|Q13148|TADBP_HUMAN	TAR DNA-binding protein 43 OS=Homo sapiens GN=TARDBP PE=1 SV=1
0.999999	0.000725426	R	AFAFVTFADDQIAQSLCGEDLIIK	G	1 x Carbamidomethyl (C)	AFAFVTFADDQIAQSLC(+57.02)GEDLIIK	2	0	TDP43-219	23080	23080	21	46	2671.32	1336.66	1336.67	-0.00708008	-2.65041	sp|Q13148|TADBP_HUMAN	TAR DNA-binding protein 43 OS=Homo sapiens GN=TARDBP PE=1 SV=1
0.999999	0.000725426	R	AFAFVTFADDQIAQSLCGEDLIIK	G	1 x Carbamidomethyl (C)	AFAFVTFADDQIAQSLC(+57.02)GEDLIIK	3	0	TDP43-219	23134	23134	37	46	2671.32	891.447	891.447	-0.000976562	-0.365573	sp|Q13148|TADBP_HUMAN	TAR DNA-binding protein 43 OS=Homo sapiens GN=TARDBP PE=1 SV=1
0.999999	0.000725426	R	AFAFVTFADDQIAQSLCGEDLIIK	G	1 x Carbamidomethyl (C)	AFAFVTFADDQIAQSLC(+57.02)GEDLIIK	3	0	TDP43-219	23261	23261	33	46	2671.32	891.448	891.447	0.00195312	0.731144	sp|Q13148|TADBP_HUMAN	TAR DNA-binding protein 43 OS=Homo sapiens GN=TARDBP PE=1 SV=1
0.999999	0.000725426	R	AFAFVTFADDQIAQSLCGEDLIIK	G	1 x Carbamidomethyl (C)	AFAFVTFADDQIAQSLC(+57.02)GEDLIIK	2	0	TDP43-219	23311	23311	18	46	2671.32	1336.67	1336.67	0.000976562	0.365573	sp|Q13148|TADBP_HUMAN	TAR DNA-binding protein 43 OS=Homo sapiens GN=TARDBP PE=1 SV=1
0.999999	0.000725426	R	AFAFVTFADDQIAQSLCGEDLIIK	G	1 x Carbamidomethyl (C)	AFAFVTFADDQIAQSLC(+57.02)GEDLIIK	3	0	TDP43-219	23374	23374	34	46	2671.32	891.447	891.447	-0.000976562	-0.365573	sp|Q13148|TADBP_HUMAN	TAR DNA-binding protein 43 OS=Homo sapiens GN=TARDBP PE=1 SV=1
0.999999	0.000725426	R	AFAFVTFADDQIAQSLCGEDLIIK	G	1 x Carbamidomethyl (C)	AFAFVTFADDQIAQSLC(+57.02)GEDLIIK	3	0	TDP43-219	23430	23430	35	46	2671.32	891.781	891.447	-0.00805664	-3.01598	sp|Q13148|TADBP_HUMAN	TAR DNA-binding protein 43 OS=Homo sapiens GN=TARDBP PE=1 SV=1
0.999999	0.000725426	R	AFAFVTFADDQIAQSLCGEDLIIK	G	1 x Carbamidomethyl (C)	AFAFVTFADDQIAQSLC(+57.02)GEDLIIK	3	0	TDP43-219	23491	23491	29	46	2671.32	891.449	891.447	0.00488281	1.82786	sp|Q13148|TADBP_HUMAN	TAR DNA-binding protein 43 OS=Homo sapiens GN=TARDBP PE=1 SV=1
0.999999	0.000725426	R	AFAFVTFADDQIAQSLCGEDLIIK	G	1 x Carbamidomethyl (C)	AFAFVTFADDQIAQSLC(+57.02)GEDLIIK	3	0	TDP43-219	23563	23563	24	46	2671.32	891.78	891.447	-0.0109863	-4.11269	sp|Q13148|TADBP_HUMAN	TAR DNA-binding protein 43 OS=Homo sapiens GN=TARDBP PE=1 SV=1
0.993669	0.00119296	R	AFAFVTFADDQIAQSLCGEDLIIK	G	1 x Carbamidomethyl (C)	AFAFVTFADDQIAQSLC(+57.02)GEDLIIK	2	0	TDP43-219	23193	23193	15	46	2671.32	1336.66	1336.67	-0.00512695	-1.91926	sp|Q13148|TADBP_HUMAN	TAR DNA-binding protein 43 OS=Homo sapiens GN=TARDBP PE=1 SV=1
0.855263	0.00528681	R	AFAFVTFADDQIAQSLCGEDLIIK	G	1 x Carbamidomethyl (C)	AFAFVTFADDQIAQSLC(+57.02)GEDLIIK	2	0	TDP43-219	23339	23339	13	46	2671.32	1337.16	1336.67	-0.0161133	-6.03196	sp|Q13148|TADBP_HUMAN	TAR DNA-binding protein 43 OS=Homo sapiens GN=TARDBP PE=1 SV=1
0.999999	0.000725426	R	FGGNPGGFGNQGGFGNSR	G		FGGNPGGFGNQGGFGNSR	2	0	TDP43-247	8652	8652	21	34	1725.76	864.39	863.887	-0.000976562	-0.565874	sp|Q13148|TADBP_HUMAN	TAR DNA-binding protein 43 OS=Homo sapiens GN=TARDBP PE=1 SV=1
0.999999	0.000725426	R	FGGNPGGFGNQGGFGNSR	G		FGGNPGGFGNQGGFGNSR	2	0	TDP43-247	8666	8666	21	34	1725.76	863.888	863.887	0.00402832	2.33423	sp|Q13148|TADBP_HUMAN	TAR DNA-binding protein 43 OS=Homo sapiens GN=TARDBP PE=1 SV=1
0.999999	0.000725426	R	FGGNPGGFGNQGGFGNSR	G		FGGNPGGFGNQGGFGNSR	2	0	TDP43-219	8504	8504	23	34	1725.76	863.888	863.887	0.00402832	2.33423	sp|Q13148|TADBP_HUMAN	TAR DNA-binding protein 43 OS=Homo sapiens GN=TARDBP PE=1 SV=1
0.999999	0.000725426	R	FGGNPGGFGNQGGFGNSR	G		FGGNPGGFGNQGGFGNSR	2	0	TDP43-219	8614	8614	23	34	1725.76	863.888	863.887	0.00402832	2.33423	sp|Q13148|TADBP_HUMAN	TAR DNA-binding protein 43 OS=Homo sapiens GN=TARDBP PE=1 SV=1
0.999999	0.000725426	K	GISVHISNAEPK	H		GISVHISNAEPK	2	0	TDP43-247	4959	4959	13	22	1250.66	626.338	626.337	-0.000976562	-0.780837	sp|Q13148|TADBP_HUMAN	TAR DNA-binding protein 43 OS=Homo sapiens GN=TARDBP PE=1 SV=1
0.999999	0.000725426	K	GISVHISNAEPK	H		GISVHISNAEPK	2	0	TDP43-219	4774	4774	16	22	1250.66	626.338	626.337	-0.000976562	-0.780837	sp|Q13148|TADBP_HUMAN	TAR DNA-binding protein 43 OS=Homo sapiens GN=TARDBP PE=1 SV=1
0.999999	0.000725426	K	GISVHISNAEPK	H		GISVHISNAEPK	2	0	TDP43-219	4885	4885	14	22	1250.66	626.338	626.337	-0.000976562	-0.780837	sp|Q13148|TADBP_HUMAN	TAR DNA-binding protein 43 OS=Homo sapiens GN=TARDBP PE=1 SV=1
0.999999	0.000725426	K	GISVHISNAEPK	H		GISVHISNAEPK	2	0	TDP43-219	4495	4495	16	22	1250.66	626.338	626.337	-0.000976562	-0.780837	sp|Q13148|TADBP_HUMAN	TAR DNA-binding protein 43 OS=Homo sapiens GN=TARDBP PE=1 SV=1
0.999016	0.000725426	K	GISVHISNAEPK	H		GISVHISNAEPK	2	0	TDP43-247	4705	4705	19	22	1250.66	626.338	626.337	-0.001	-0.799578	sp|Q13148|TADBP_HUMAN	TAR DNA-binding protein 43 OS=Homo sapiens GN=TARDBP PE=1 SV=1
0.9977	0.00119296	K	GISVHISNAEPK	H		GISVHISNAEPK	2	0	TDP43-247	5027	5027	20	22	1250.66	626.84	626.337	1.003	801.977	sp|Q13148|TADBP_HUMAN	TAR DNA-binding protein 43 OS=Homo sapiens GN=TARDBP PE=1 SV=1
0.713422	0.00702459	K	GISVHISNAEPK	H		GISVHISNAEPK	2	0	TDP43-219	4998	4998	12	22	1250.66	626.333	626.337	-0.0109863	-8.7844	sp|Q13148|TADBP_HUMAN	TAR DNA-binding protein 43 OS=Homo sapiens GN=TARDBP PE=1 SV=1
0.545366	0.00935039	K	GISVHISNAEPK	H		GISVHISNAEPK	3	0	TDP43-219	4814	4814	15	22	1250.66	417.895	417.894	0.000976562	0.780837	sp|Q13148|TADBP_HUMAN	TAR DNA-binding protein 43 OS=Homo sapiens GN=TARDBP PE=1 SV=1
TDP43-219
TDP43-247

## Sheet: unique to DHFR-Ub
proteins isolated from Soluble fraction that are unique to DHFR-Ub
Protein	Gene	Description	Length (AA)	mw (Da)	PSMs	Peptide Seqs	% Coverage	Modifications Observed
Q13509	TBB3	Tubulin beta-3 chain OS=Homo sapiens GN=TUBB3 PE=1 SV=2	450	50526.3	4	2	11.5
Q9BUF5	TBB6	Tubulin beta-6 chain OS=Homo sapiens GN=TUBB6 PE=1 SV=1	446	49951.1	3	2	9.3
P62249	RS16	40S ribosomal protein S16 OS=Homo sapiens GN=RPS16 PE=1 SV=2	146	16471.1	2	2	2.9
P38919	IF4A3	Eukaryotic initiation factor 4A-III OS=Homo sapiens GN=EIF4A3 PE=1 SV=4	411	46949.2	2	13	30.4	Carbamidomethyl (C),Oxidation (M)

## Sheet: unique to 219
proteins isolated from Soluble fraction that are unique to TDP43-219
Protein	Gene	Description	Length (AA)	mw (Da)	PSMs	Peptide Seqs	% Coverage	Modifications Observed
P27708	PYR1	CAD protein OS=Homo sapiens GN=CAD PE=1 SV=3	2225	243496	4	4	1.9	Carbamidomethyl (C)
P46779	RL28	60S ribosomal protein L28 OS=Homo sapiens GN=RPL28 PE=1 SV=3	137	15773.7	2	2	16.1	Acetyl (Protein N-term),Oxidation (M)
P04406	G3P	Glyceraldehyde-3-phosphate dehydrogenase OS=Homo sapiens GN=GAPDH PE=1 SV=3	335	36120.4	2	2	8.7	Carbamidomethyl (C)
P06493	CDK1	Cyclin-dependent kinase 1 OS=Homo sapiens GN=CDK1 PE=1 SV=3	297	34145.9	5	2	6.1
Q02878	RL6	60S ribosomal protein L6 OS=Homo sapiens GN=RPL6 PE=1 SV=3	288	32779.7	3	2	8.7	Gln->pyro-Glu (N-term Q)
P13639	EF2	Elongation factor 2 OS=Homo sapiens GN=EEF2 PE=1 SV=4	858	95529.1	3	3	4.3	Oxidation (M)
Q71UM5	RS27L	40S ribosomal protein S27-like OS=Homo sapiens GN=RPS27L PE=1 SV=3	84	9488.88	1	3	38.1	Carbamidomethyl (C),Oxidation (M)
found in more than 1 prep with 219 fragment

## Sheet: unique to 247
proteins isolated from Soluble fraction that are unique to TDP43-247
Protein	Gene	Description	Length (AA)	mw (Da)	PSMs	Peptide Seqs	% Coverage	Modifications Observed
Q9UHX1	PUF60	Poly(U)-binding-splicing factor PUF60 OS=Homo sapiens GN=PUF60 PE=1 SV=1	559	59999.7	3	2	4.8
Q12905	ILF2	Interleukin enhancer-binding factor 2 OS=Homo sapiens GN=ILF2 PE=1 SV=2	390	43143.2	2	2	7.7
Q96FV9	THOC1	THO complex subunit 1 OS=Homo sapiens GN=THOC1 PE=1 SV=1	657	75798.6	2	3	5.3	Oxidation (M)
Q9BUF5	TBB6	Tubulin beta-6 chain OS=Homo sapiens GN=TUBB6 PE=1 SV=1	446	49951.1	2	6	13.7	Carbamidomethyl (C),Oxidation (M)
P38159	RBMX	RNA-binding motif protein, X chromosome OS=Homo sapiens GN=RBMX PE=1 SV=3	391	42414.4	2	2	5.4
P32969	RL9	60S ribosomal protein L9 OS=Homo sapiens GN=RPL9 PE=1 SV=1	192	21903.8	2	2	13	Carbamidomethyl (C),Oxidation (M)
P62249	RS16	40S ribosomal protein S16 OS=Homo sapiens GN=RPS16 PE=1 SV=2	146	16471.1	1	2	13.7
P38919	IF4A3	Eukaryotic initiation factor 4A-III OS=Homo sapiens GN=EIF4A3 PE=1 SV=4	411	46949.2	1	3	9.2
