# Supplementary material
Source: Research Square preprint supplement (doi:10.21203/rs.3.rs-8921356/v1)

Fig 2B

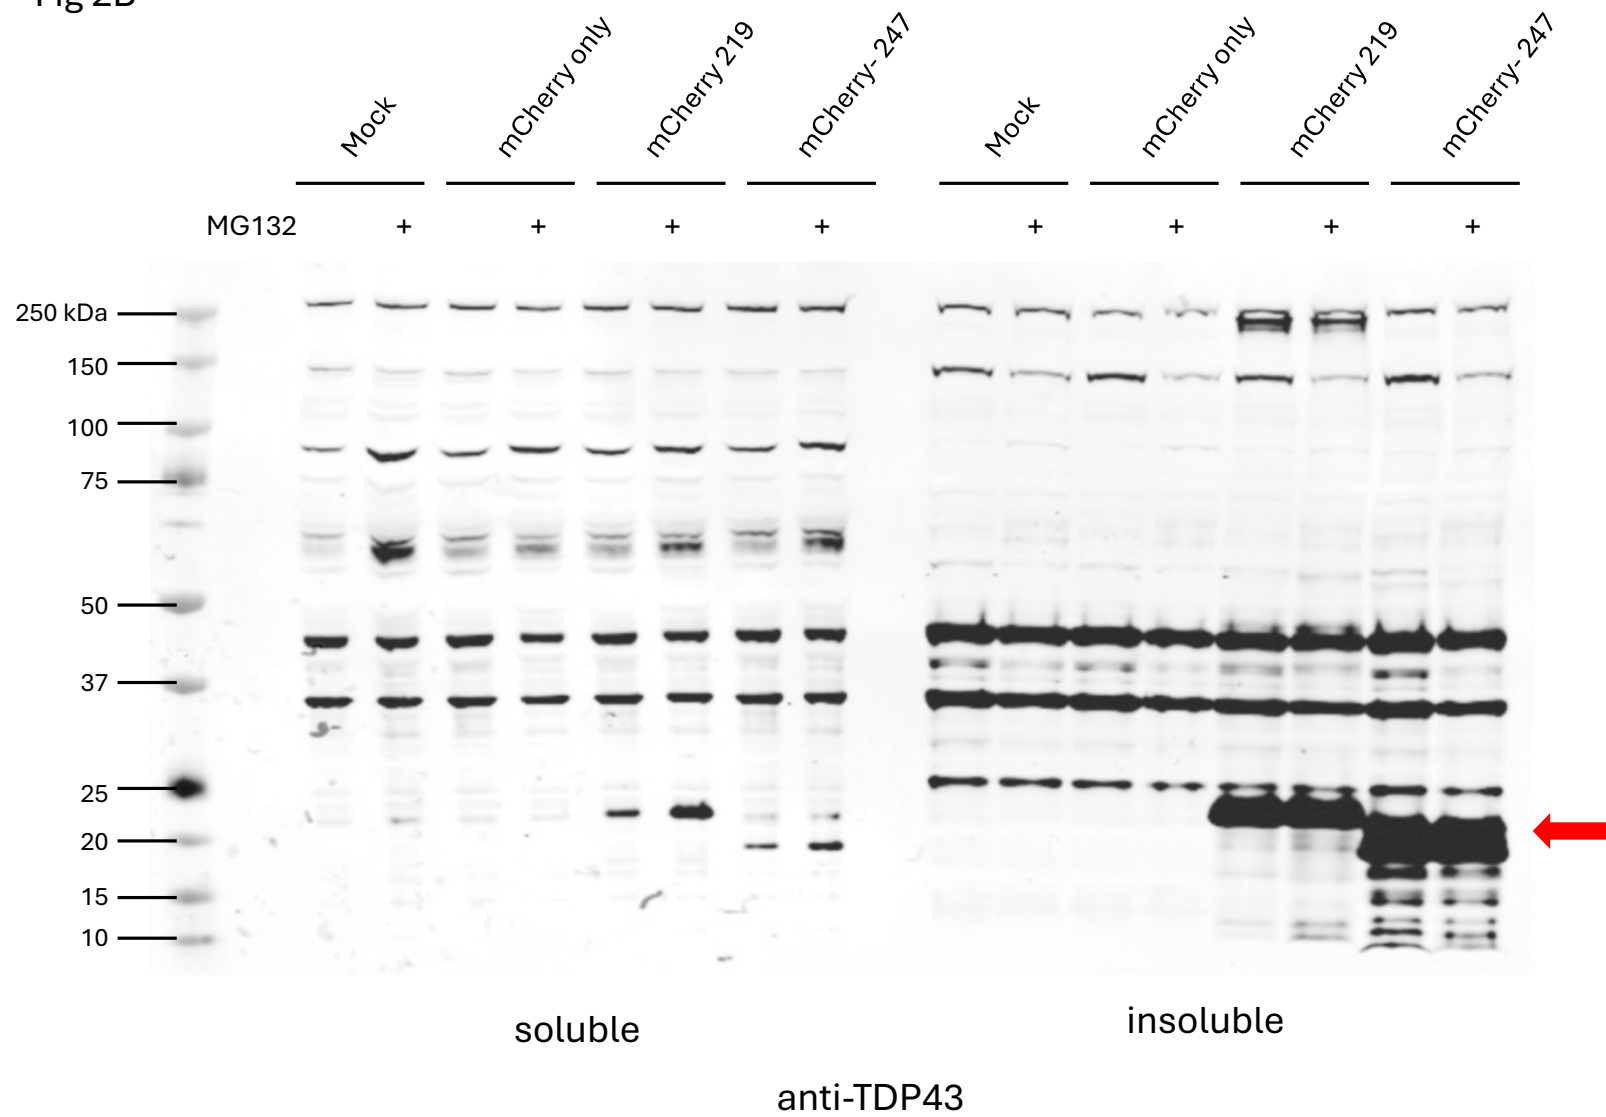

Fig 2B - reprobated for anti-mCherry

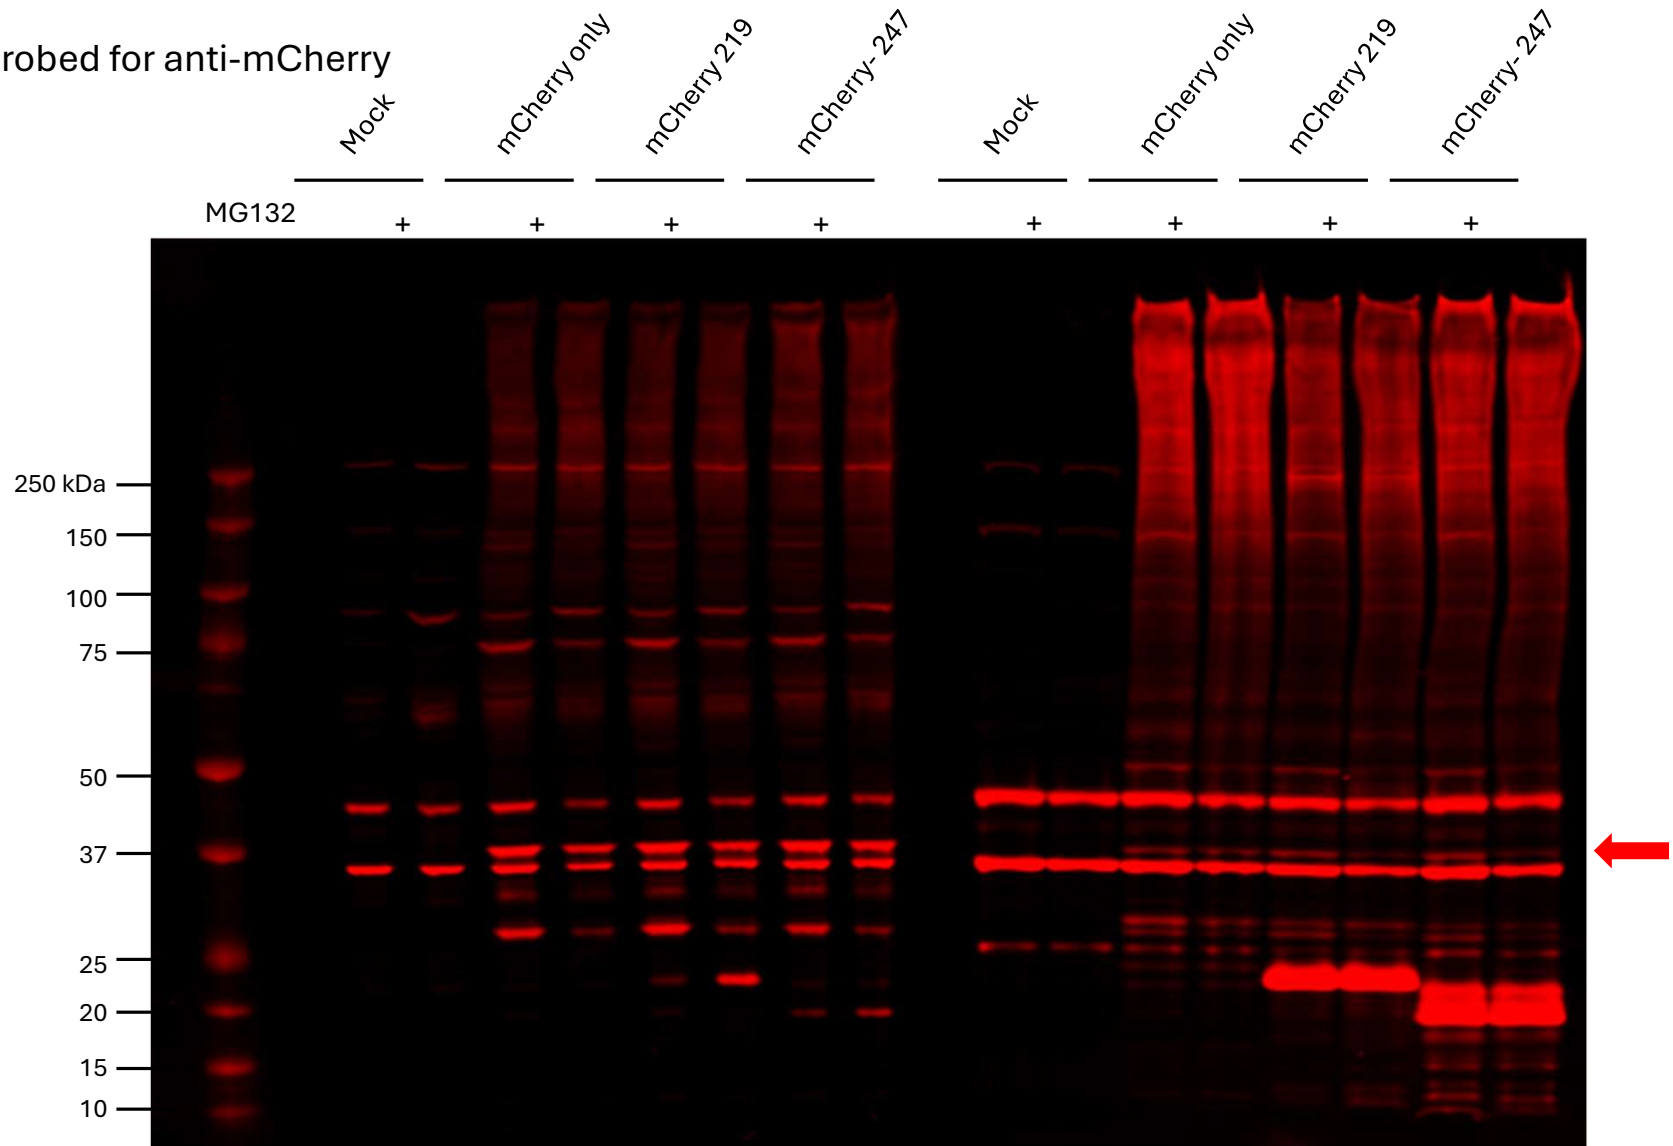

Fig 2F

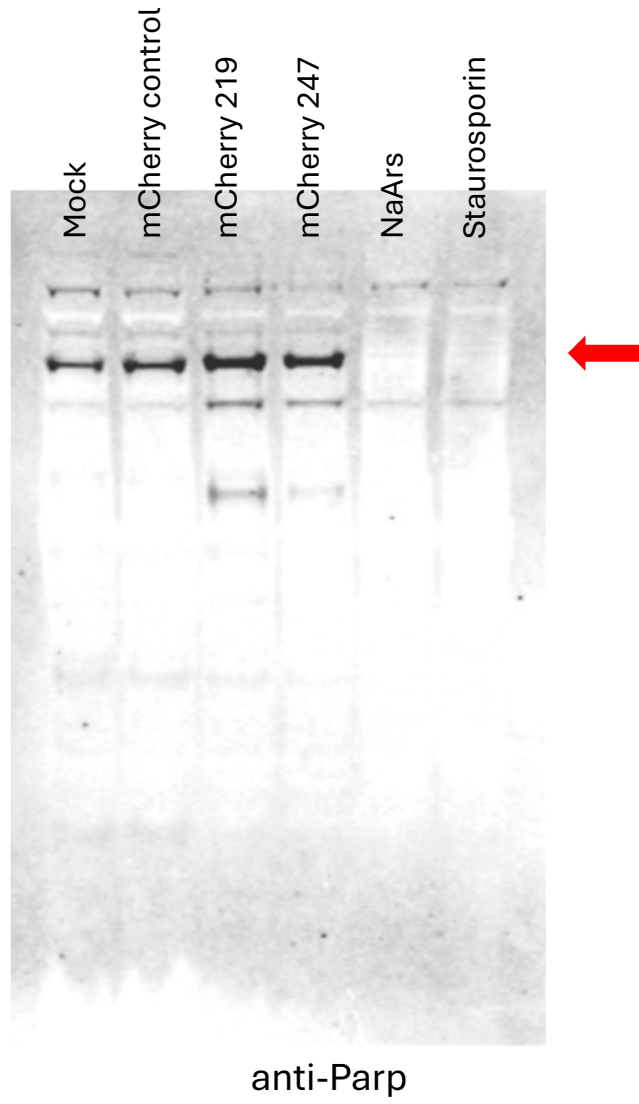

Fig 6A

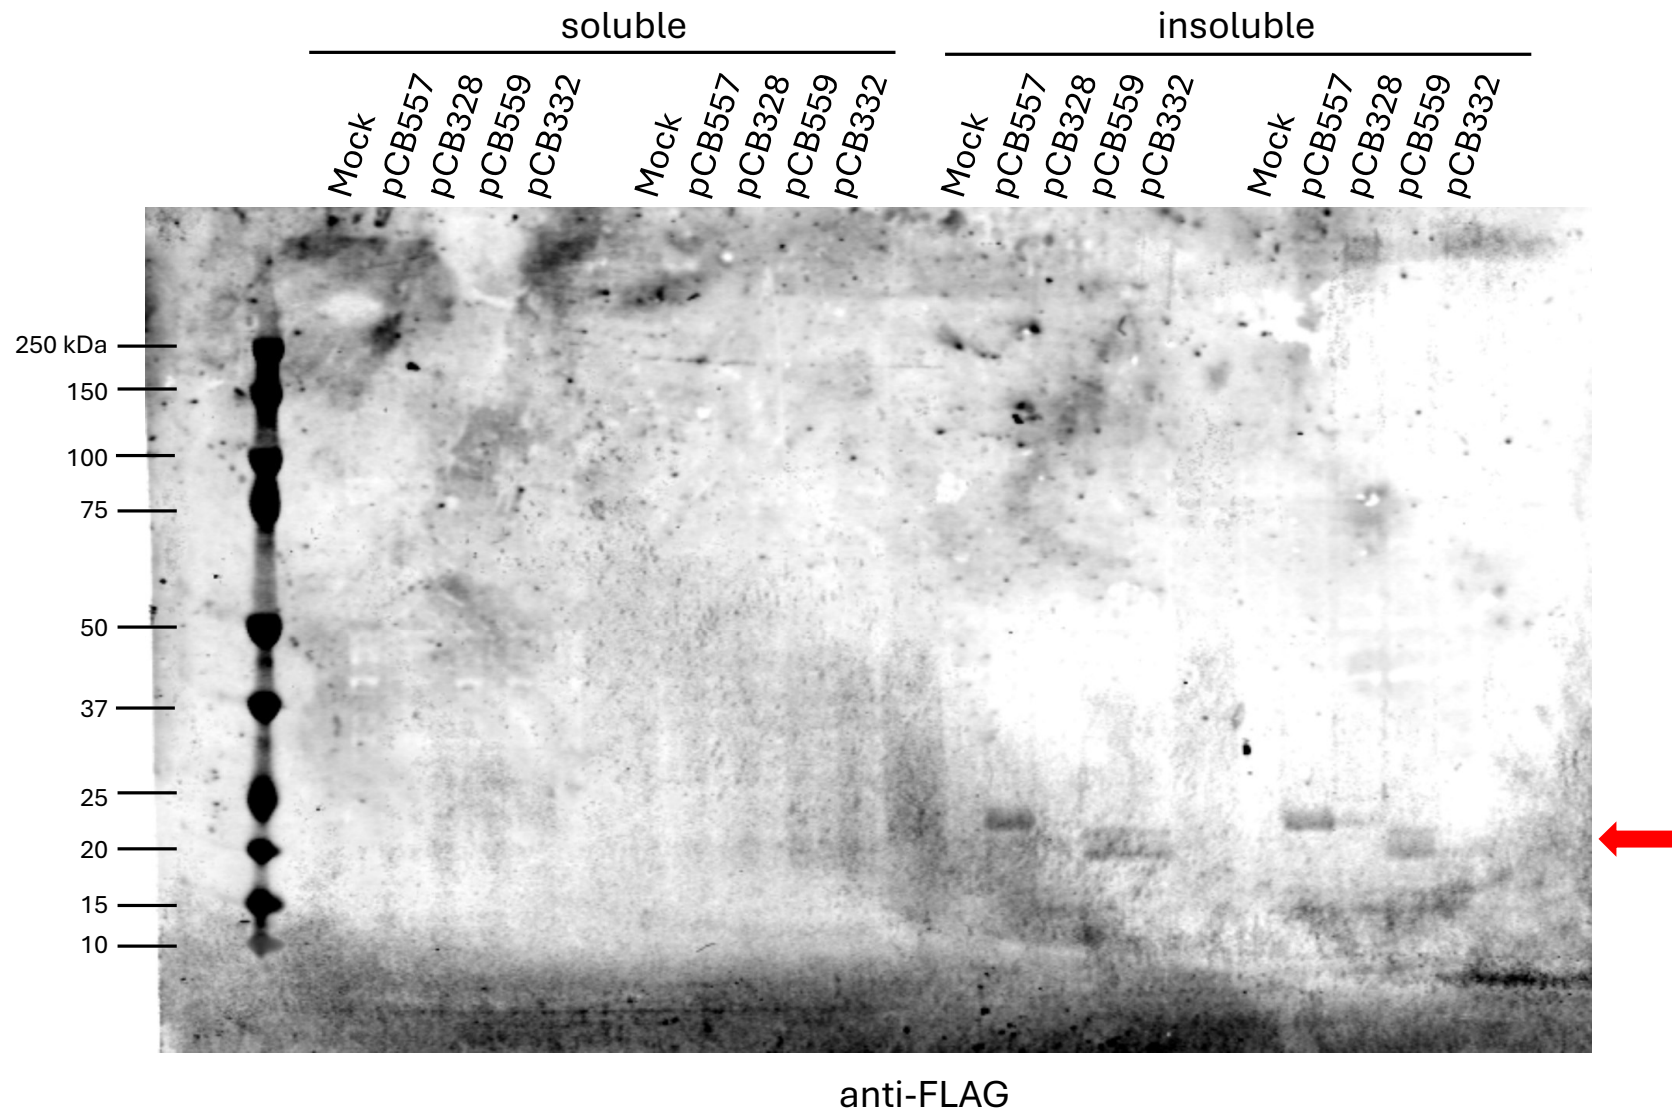

Fig 6C

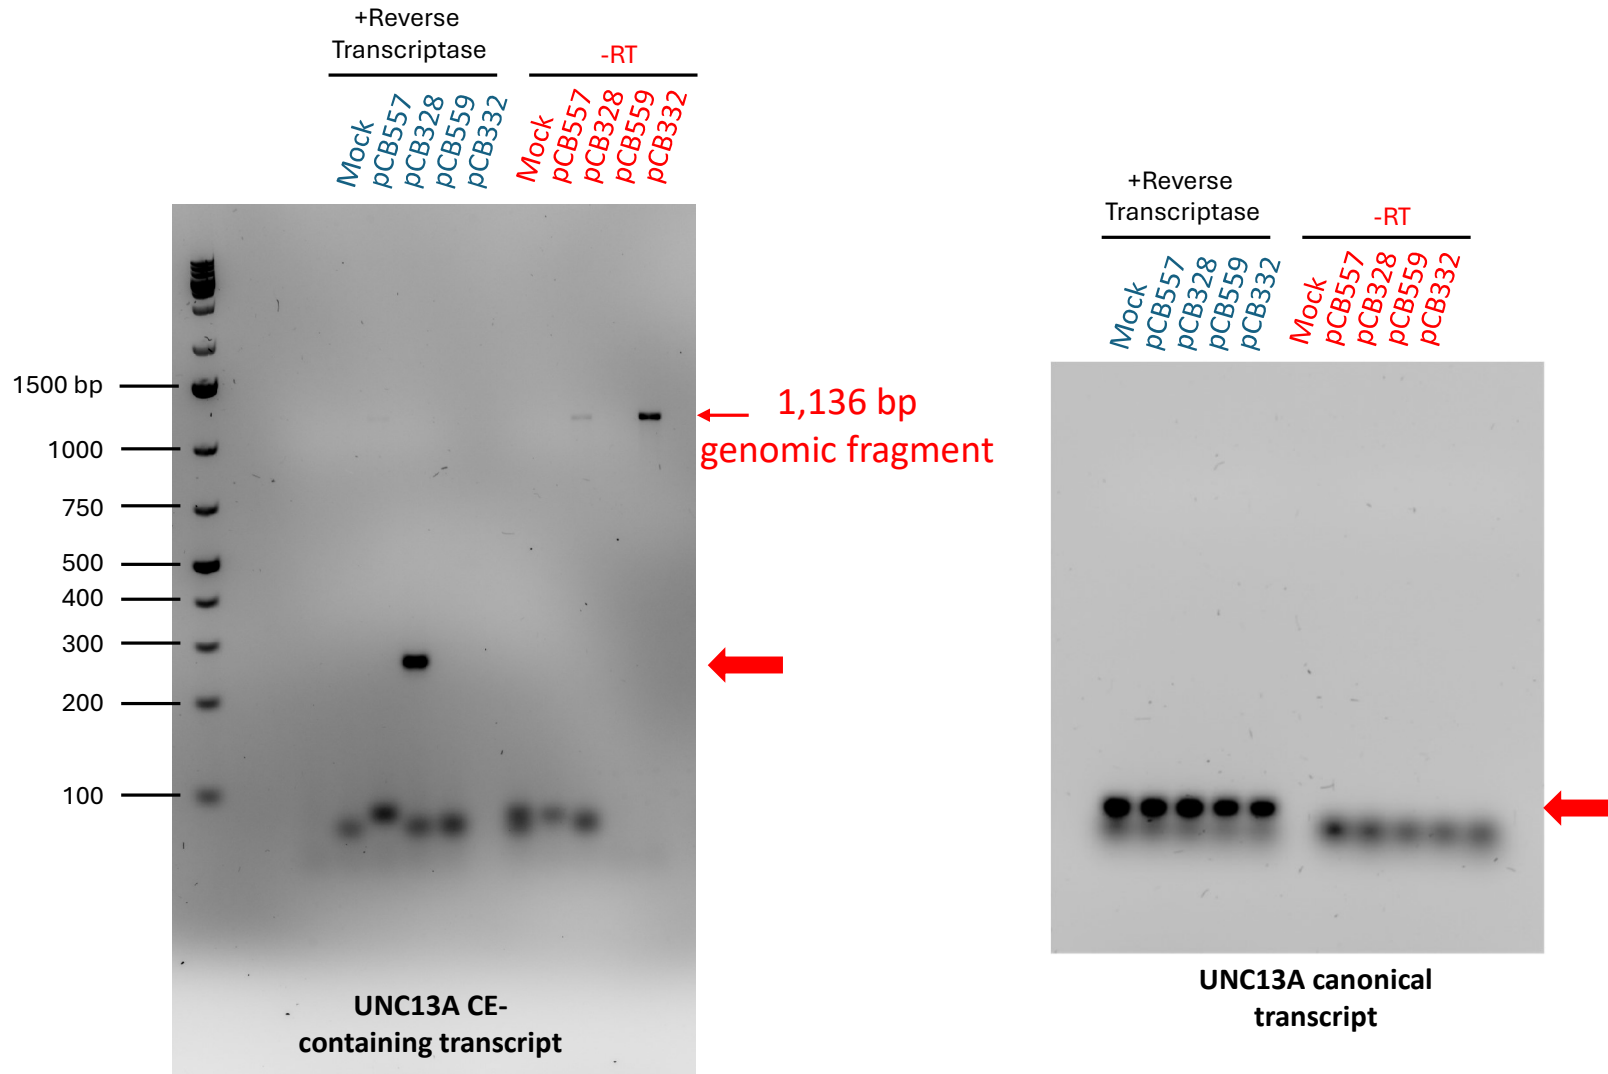

Fig 6F

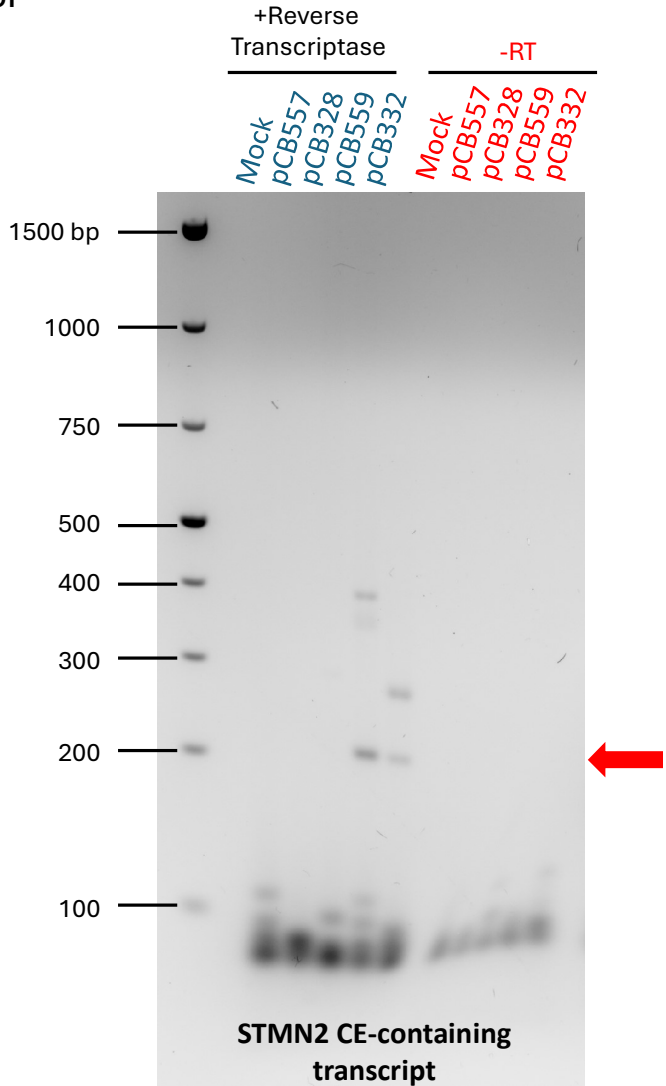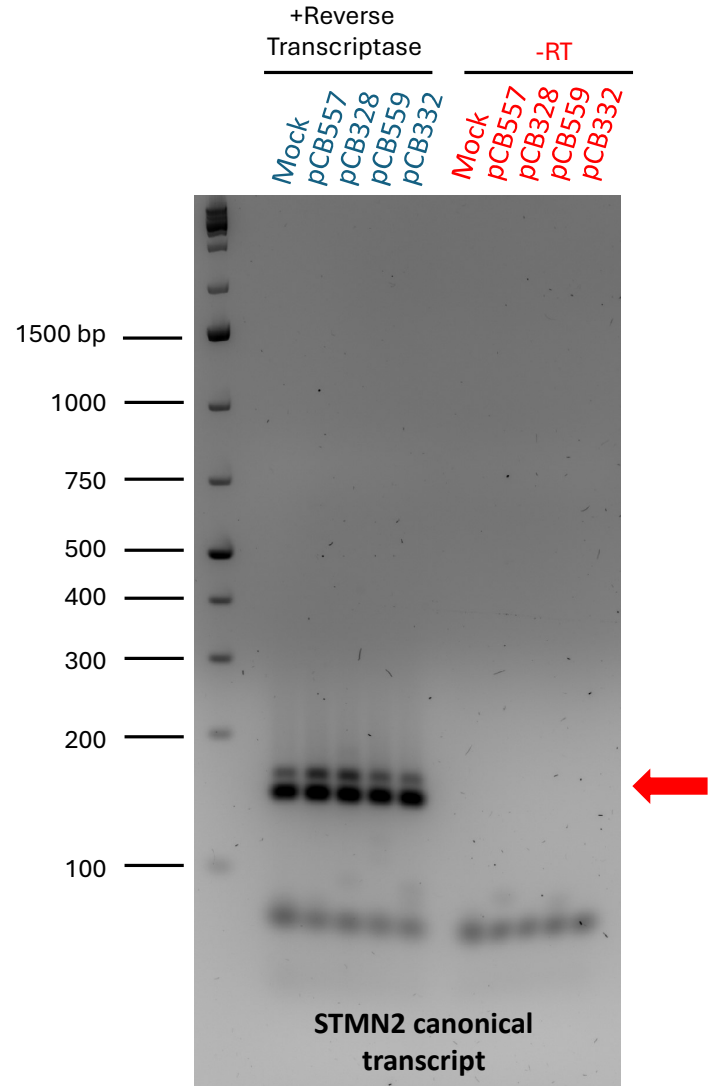

Fig 7C

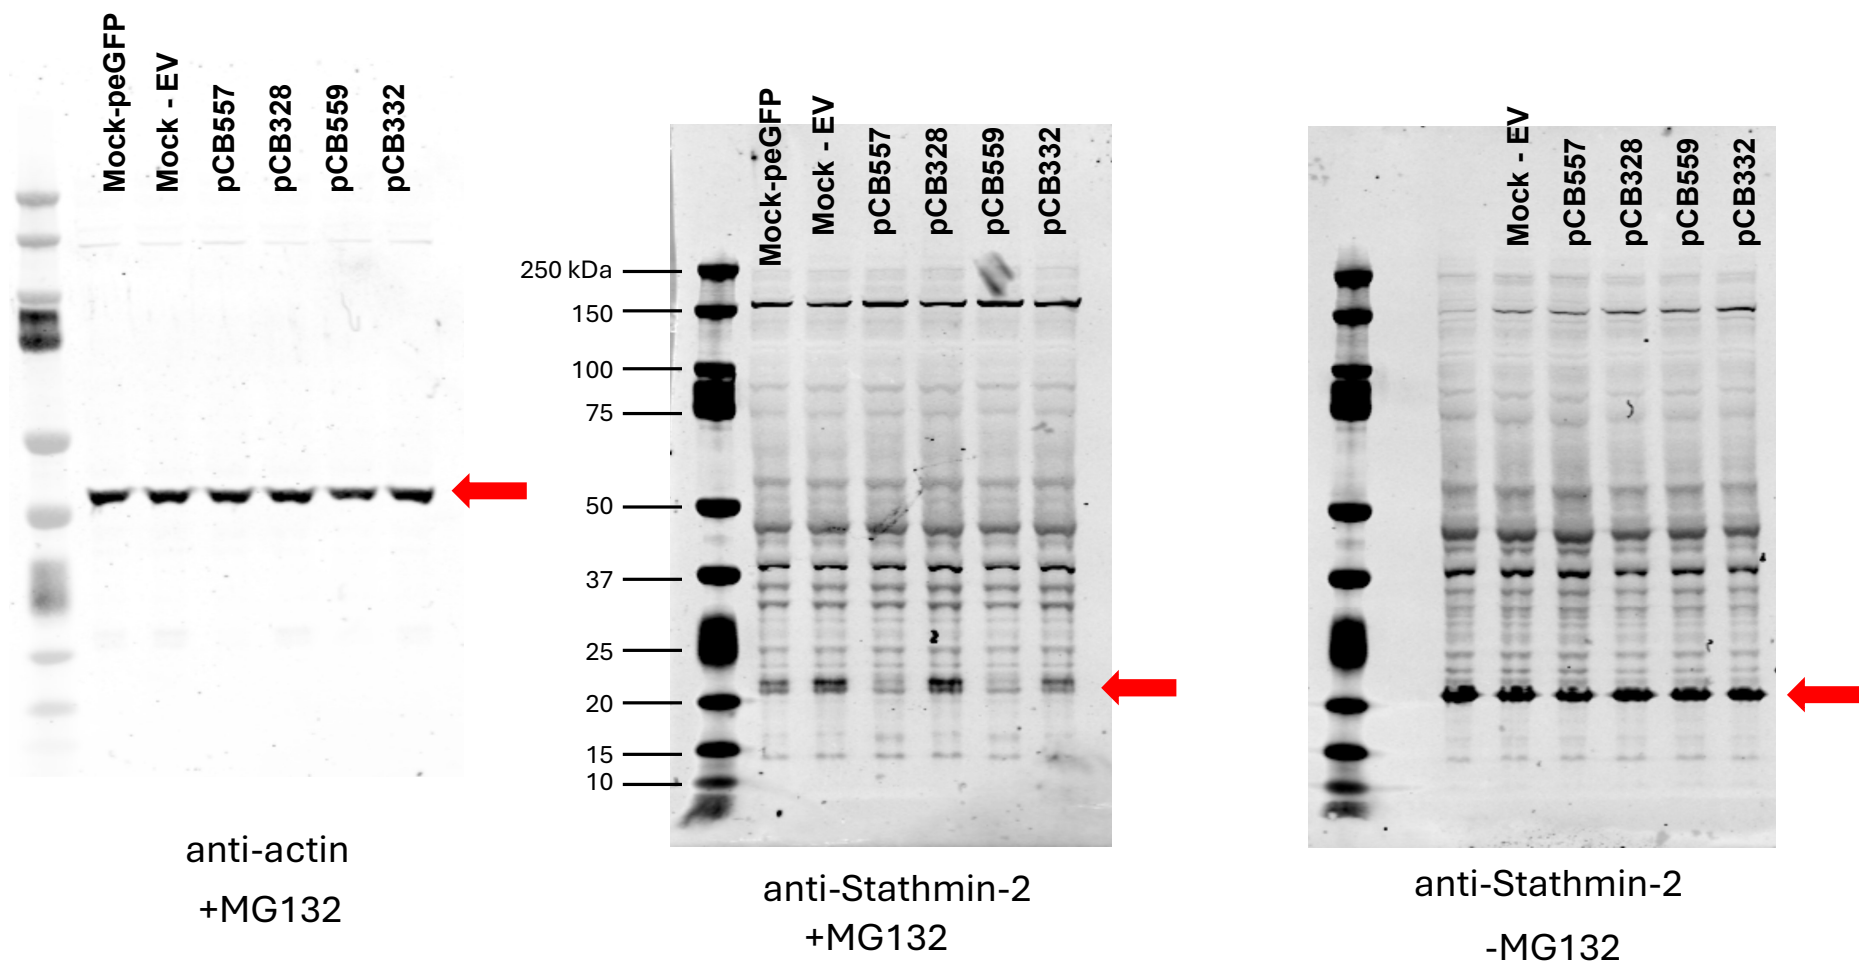

Marker: BioRad 161-0374

Supplement: Supplementary file 2 [file cdac006e41fe73b079ae0ffc.pdf]
